# Supplementary material
Source: PubMed Central journal article supplement (PMC9038694)
Supplement: NIHMS1774352-supplement-1.pdf [file NIHMS1774352-supplement-1.pdf]

## Supplemental Materials and Methods

### Evaluating Eosinophilic Colitis as a Unique Disease using Colonic Molecular Profiles: A Multi-Site Study

Tetsuo Shoda<sup>1</sup>, Margaret H. Collins<sup>2</sup>, Mark Rochman<sup>1</sup>, Ting Wen<sup>1,3</sup>, Julie M. Caldwell<sup>1</sup>, Lydia E. Mack<sup>1</sup>, Garrett A. Osswald<sup>1</sup>, John A. Besse<sup>1</sup>, Yael Haberman<sup>4,5</sup>, Seema S. Aceves<sup>6</sup>, Nicoleta C. Arva<sup>7</sup>, Kelley E. Capocelli<sup>8</sup>, Mirna Chehade<sup>9</sup>, Carla M. Davis<sup>10</sup>, Evan S. Dellon<sup>11</sup>, Gary W. Falk<sup>12</sup>, Nirmala Gonsalves<sup>13</sup>, Sandeep K. Gupta<sup>14</sup>, Ikuo Hirano<sup>13</sup>, Paneez Khoury<sup>15</sup>, Amy Klion<sup>15</sup>, Calies Menard-Katcher<sup>16</sup>, John Leung<sup>17</sup>, Vincent Mukkada<sup>4</sup>, Philip E. Putnam<sup>4</sup>, Jonathan M. Spergel<sup>18</sup>, Joshua B. Wechsler<sup>19</sup>, Guang-Yu Yang<sup>20</sup>, Glenn T. Furuta<sup>16</sup>, Lee A. Denson<sup>4</sup>, and Marc E. Rothenberg<sup>1</sup>, on behalf of Consortium of Eosinophilic Gastrointestinal Diseases Researchers (CEGIR)\*

<sup>1</sup>Division of Allergy and Immunology, University of Cincinnati College of Medicine and Cincinnati Children's Hospital Medical Center, <sup>2</sup>Division of Pathology, University of Cincinnati College of Medicine and Cincinnati Children's Hospital Medical Center, <sup>3</sup>Department of Pathology and ARUP Laboratories, University of Utah School of Medicine, <sup>4</sup>Division of Gastroenterology, Hepatology, and Nutrition, University of Cincinnati College of Medicine and Cincinnati Children's Hospital Medical Center, <sup>5</sup>Department of Pediatrics, Sheba Medical Center, Tel-HaShomer, affiliated with the Tel-Aviv University, Israel, <sup>6</sup>Division of Allergy Immunology, Departments of Pediatrics and Medicine, University of California, San Diego, Rady Children's Hospital, San Diego, <sup>7</sup>Department of Pathology, Ann & Robert H. Lurie Children's Hospital of Chicago, Feinberg School of Medicine, Northwestern University, <sup>8</sup>Department of Pathology, Children's Hospital Colorado, <sup>9</sup>Mount Sinai Center for Eosinophilic Disorders, Icahn School of Medicine at Mount Sinai, <sup>10</sup>Section of Immunology, Allergy and Retrovirology, Baylor College of Medicine & Texas Children's Hospital, <sup>11</sup>Division of Gastroenterology and Hepatology, University of North Carolina School of Medicine, <sup>12</sup>Division of Gastroenterology, University of Pennsylvania Perelman School of Medicine, <sup>13</sup>Division of Gastroenterology & Hepatology, Northwestern University, <sup>14</sup>Division of Pediatric Gastroenterology, Hepatology and Nutrition, Riley Hospital for Children/Indiana University, and Community Health Network, <sup>15</sup>Human Eosinophil Section, National Institute of Allergy and Infectious Diseases, NIH, <sup>16</sup>Section of Pediatric Gastroenterology, Hepatology and Nutrition, Digestive Health Institute, Children's Hospital Colorado, <sup>17</sup>Division of Gastroenterology, Tufts Medical Center, <sup>18</sup>Division of Allergy and Immunology, University of Pennsylvania Perelman School of Medicine/Children's Hospital of Philadelphia, <sup>19</sup>Gastroenterology, Hepatology & Nutrition, Ann & Robert H. Lurie Children's Hospital of Chicago, <sup>20</sup>Department of Pathology and Laboratory Medicine, Northwestern University.

\*The list of participants is provided in this article's Supplementary Material

Corresponding Author: Marc E. Rothenberg, MD, PhD, Division of Allergy and Immunology, Cincinnati Children's Hospital Medical Center, Department of Pediatrics, University of Cincinnati College of Medicine: 3333 Burnet Avenue, ML 7028, Cincinnati, OH, 45229 USA; email: [Rothenberg@cchmc.org](mailto:Rothenberg@cchmc.org); telephone: 513-803-0257

## **Overview of Contents**

### **Supplementary Figures**

Supplementary Figure 1. Molecular comparisons among active EoC by clinical heterogeneity

Supplementary Figure 2. Identification of a conserved pattern of gene expression from colonic tissue of subjects with CD

Supplementary Figure 3. Functional enrichment analysis of the CD transcriptome

Supplementary Figure 4. Comparisons of EoC and CD to several different UC datasets

Supplementary Figure 5. Immunofluorescence staining of colonic biopsy

Supplementary Figure 6. EoC scores by several cut-offs

### **Supplementary Materials and Methods**

### **Supplementary Tables**

Supplementary Table 1. Number of subjects with EoC from each site

Supplementary Table 2. Inclusion/exclusion criteria, thresholds of eosinophilia, and definition of disease activity for EoC

Supplementary Table 3. Definitions of EoC histologic features

Supplementary Table 4. Demographic and clinical characteristics of study subjects

Supplementary Table 5. List of genes of EoC and CD transcriptomes in colon biopsies

Supplementary Table 6. Summary of UC transcriptomic datasets

Supplementary Table 7. List of genes in the EoC transcriptome overlapped with EoE and EoG transcriptomes

Supplementary Table 8. Functional annotation enrichment of the EoC transcriptome

Supplementary Table 9. Biological processes enriched in histo-molecular correlation for EoC

Supplementary Table 10. Gene list for EoC-IBD differential score

### **List of participants in CEGIR**

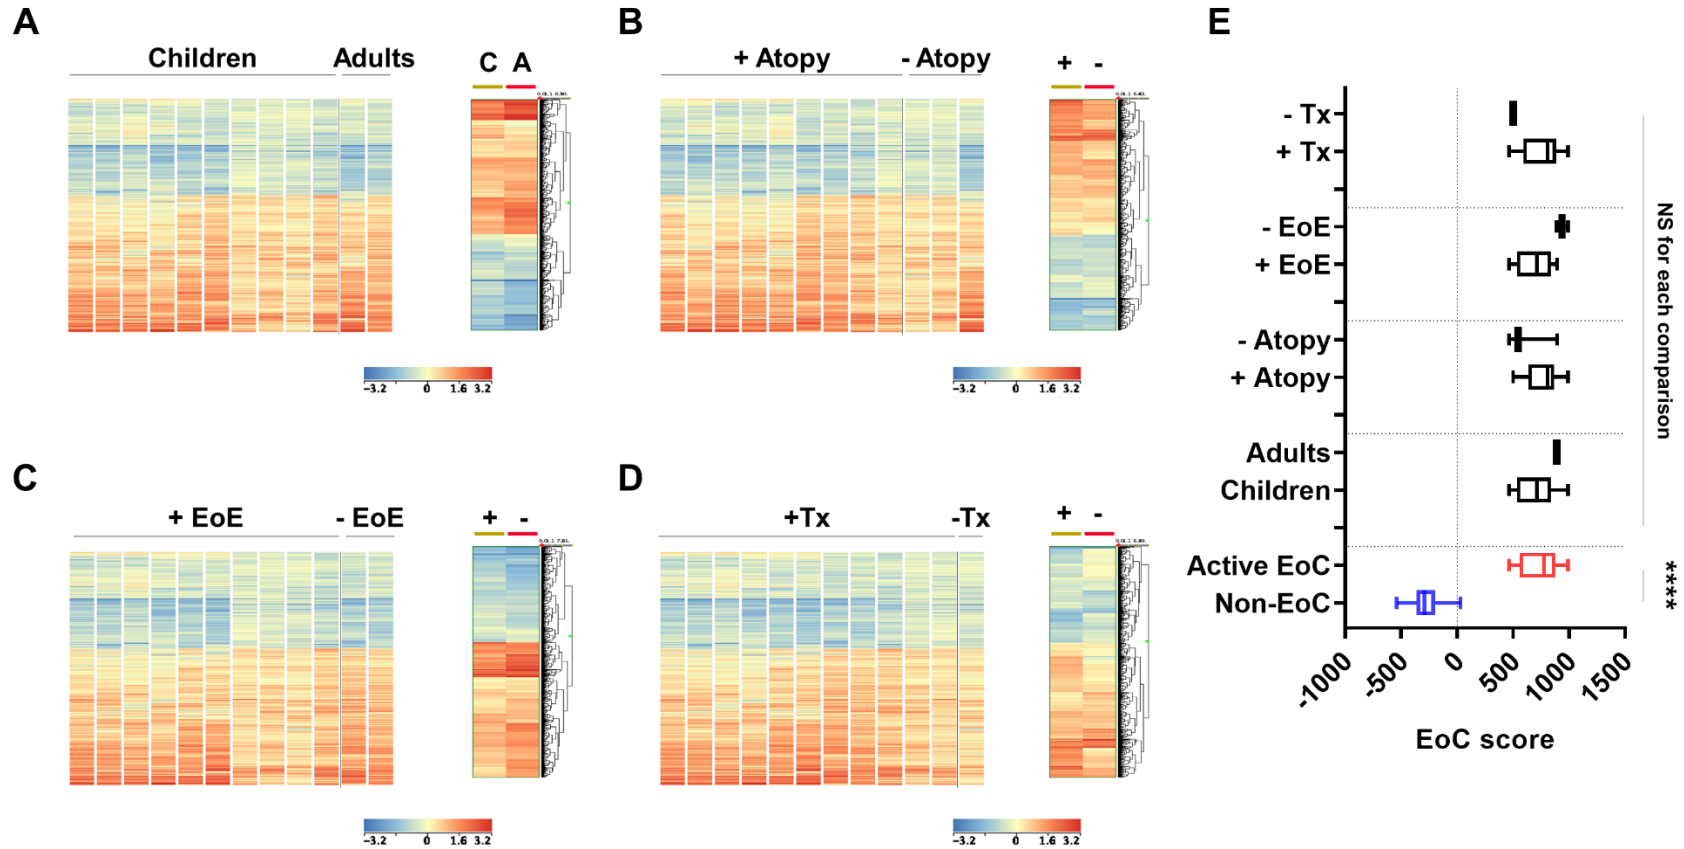

**Supplementary Figure 1. Molecular comparisons among active EoC by clinical heterogeneity.** **A-D**, Heatmap based on the EoC transcriptome by indicated groups. Heatmap was depicted by each individual (left) and averaged (right) for Age [children (C) vs. adults (A)] (A), Atopy [subjects having atopy (+ atopy) vs. subjects not having atopy (- atopy)] (B), EoE [subjects having EoE (+EoE) vs. subjects not having EoE (-EoE)] (C), and treatment [treated subjects (+Tx) vs. untreated subjects (-Tx)] (D). **E**, EoC score by indicated groups. Data are mean  $\pm$  SEM. NS, not significant, using Mann–Whitney U test. EoC, eosinophilic colitis; EoE, eosinophilic esophagitis; Treatment, Tx.

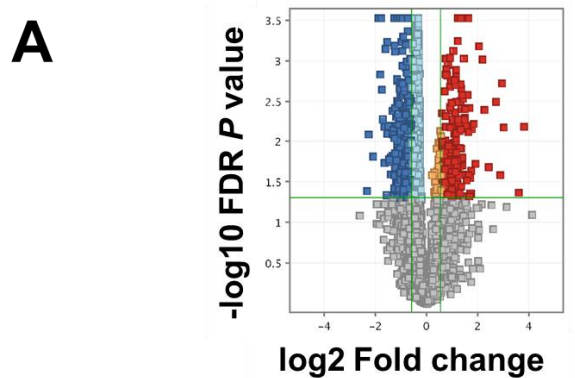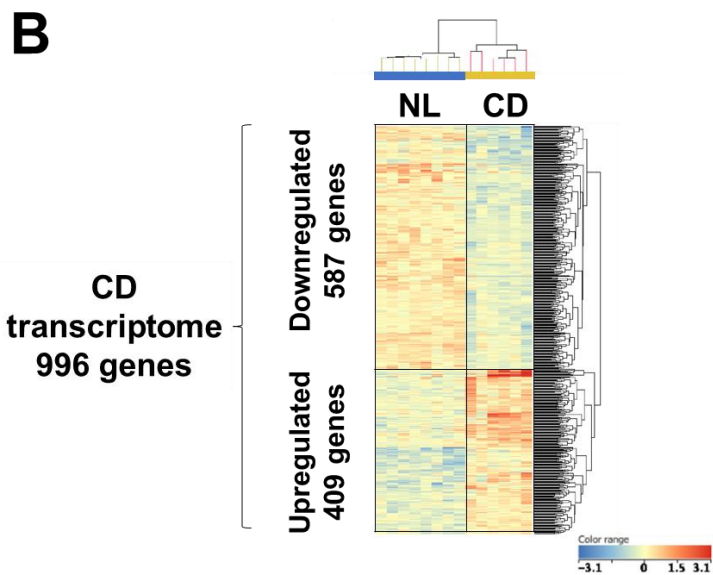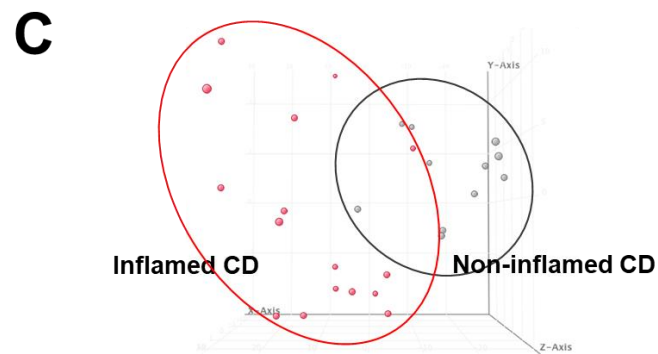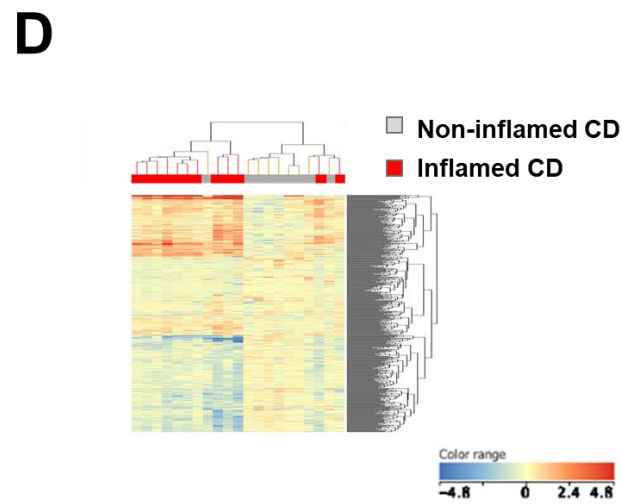

**Supplementary Figure 2. Identification of a conserved pattern of gene expression from colonic tissue of subjects with CD.** **A**, Volcano plot (*red*, upregulated; *blue*, downregulated) of expression profiles of differentially dysregulated genes between normal controls (NL) and subjects with inflamed CD (FDR  $P < .05$ ,  $\geq 1.5$ -fold change). **B**, Clustering analysis was performed on the basis of 996 differentially expressed genes (CD transcriptome); each column represents an individual subject or control. **C-D**, Unsupervised analyses [principal component analysis (C), clustering analysis (D)] of the CD transcriptome showed separation of subjects with noninflamed CD (*gray*) and subjects with inflamed CD (*red*). CD, Crohn disease; EoC, eosinophilic colitis; FDR, false discovery rate.

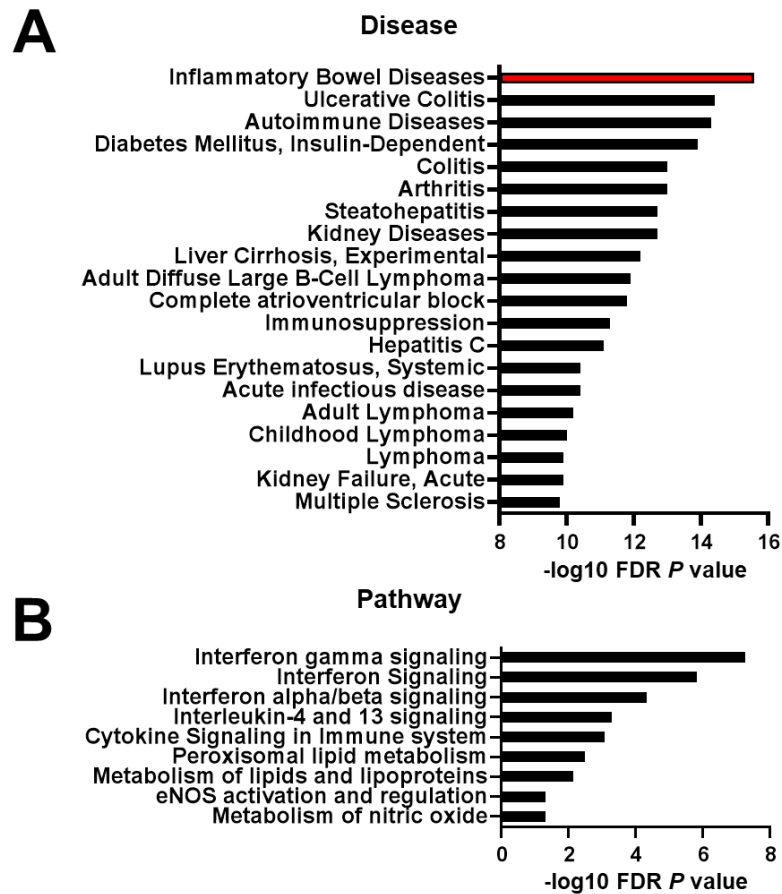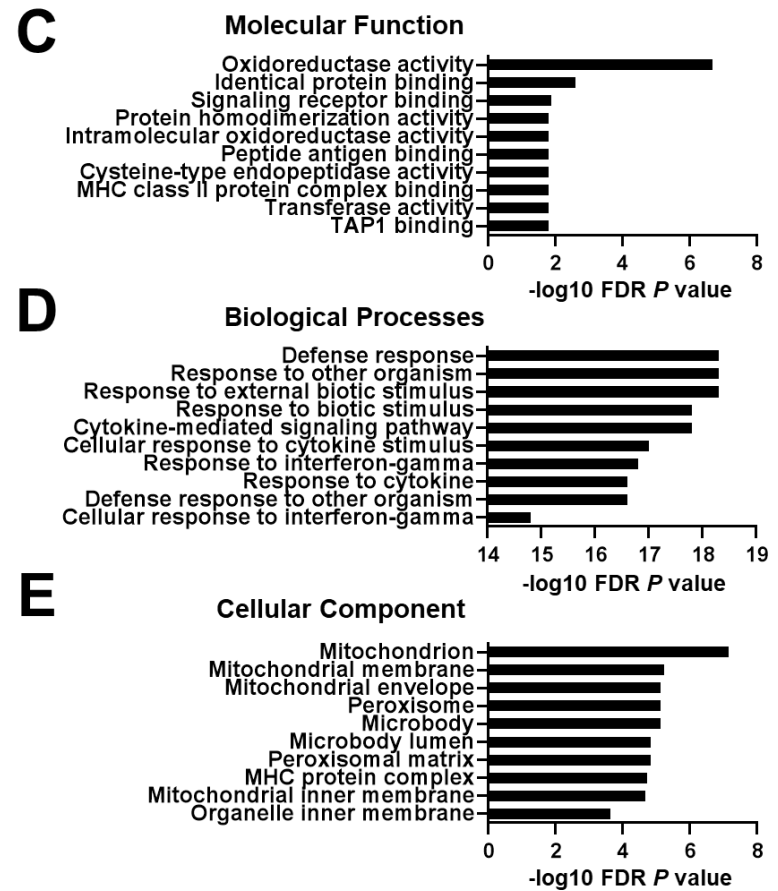

**Supplementary Figure 3. Functional enrichment analysis of the CD transcriptome.** **A**, Functional enrichment analysis in the Disease category using ToppGene (<https://toppgene.cchmc.org/>). CD transcriptome shows enrichment in Inflammatory Bowel Disease (IBD)-relevant disease pathways (*red*). **B–E**, Shown are the 10 most significant terms identified for the CD transcriptome by functional enrichment analysis in the following categories: Pathway (B), Molecular Function (C), Biological Processes (D), and Cellular Component (E). CD, Crohn disease; FDR, false discovery rate.

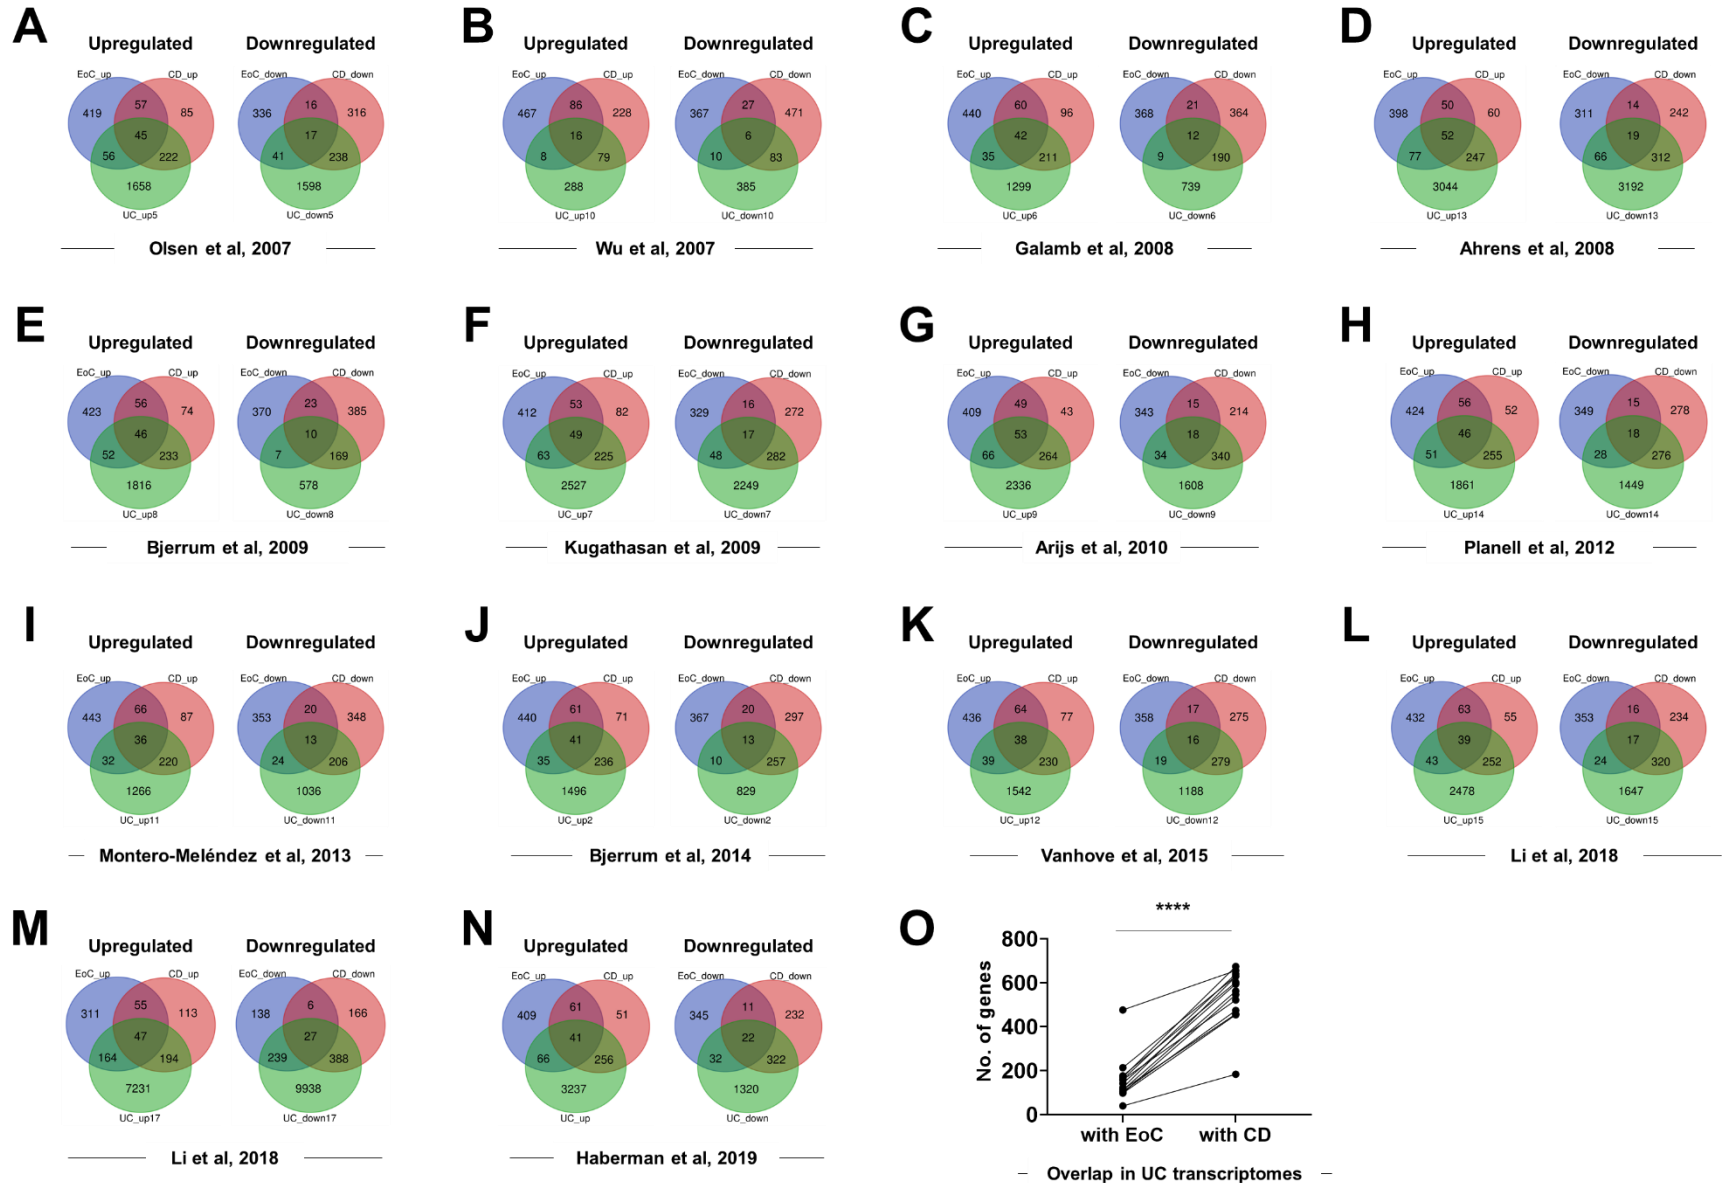

**Supplementary Figure 4. Comparisons of EoC and CD to several different UC datasets. A-N**, Venn diagrams of the number of genes dysregulated in EoC (blue) and CD (red) transcriptomes to several different pediatric UC transcriptome data from the previously published studies (green). A, GSE9452; B, GSE6731; C, GSE10714; D, GSE10191; E, GSE13367; F, GSE10616; G, GSE14580; H, GSE38713; I, GSE36807; J, GSE47908; K, GSE59071; L, GSE87473; M, GSE87473; N, GSE109142. O, Comparison of EoC and CD transcriptomes to publicly available UC transcriptomes. \*\*\*\*P < .0001, using Wilcoxon matched-pairs signed rank test. EoC, eosinophilic colitis; CD, Crohn disease; UC, ulcerative colitis.



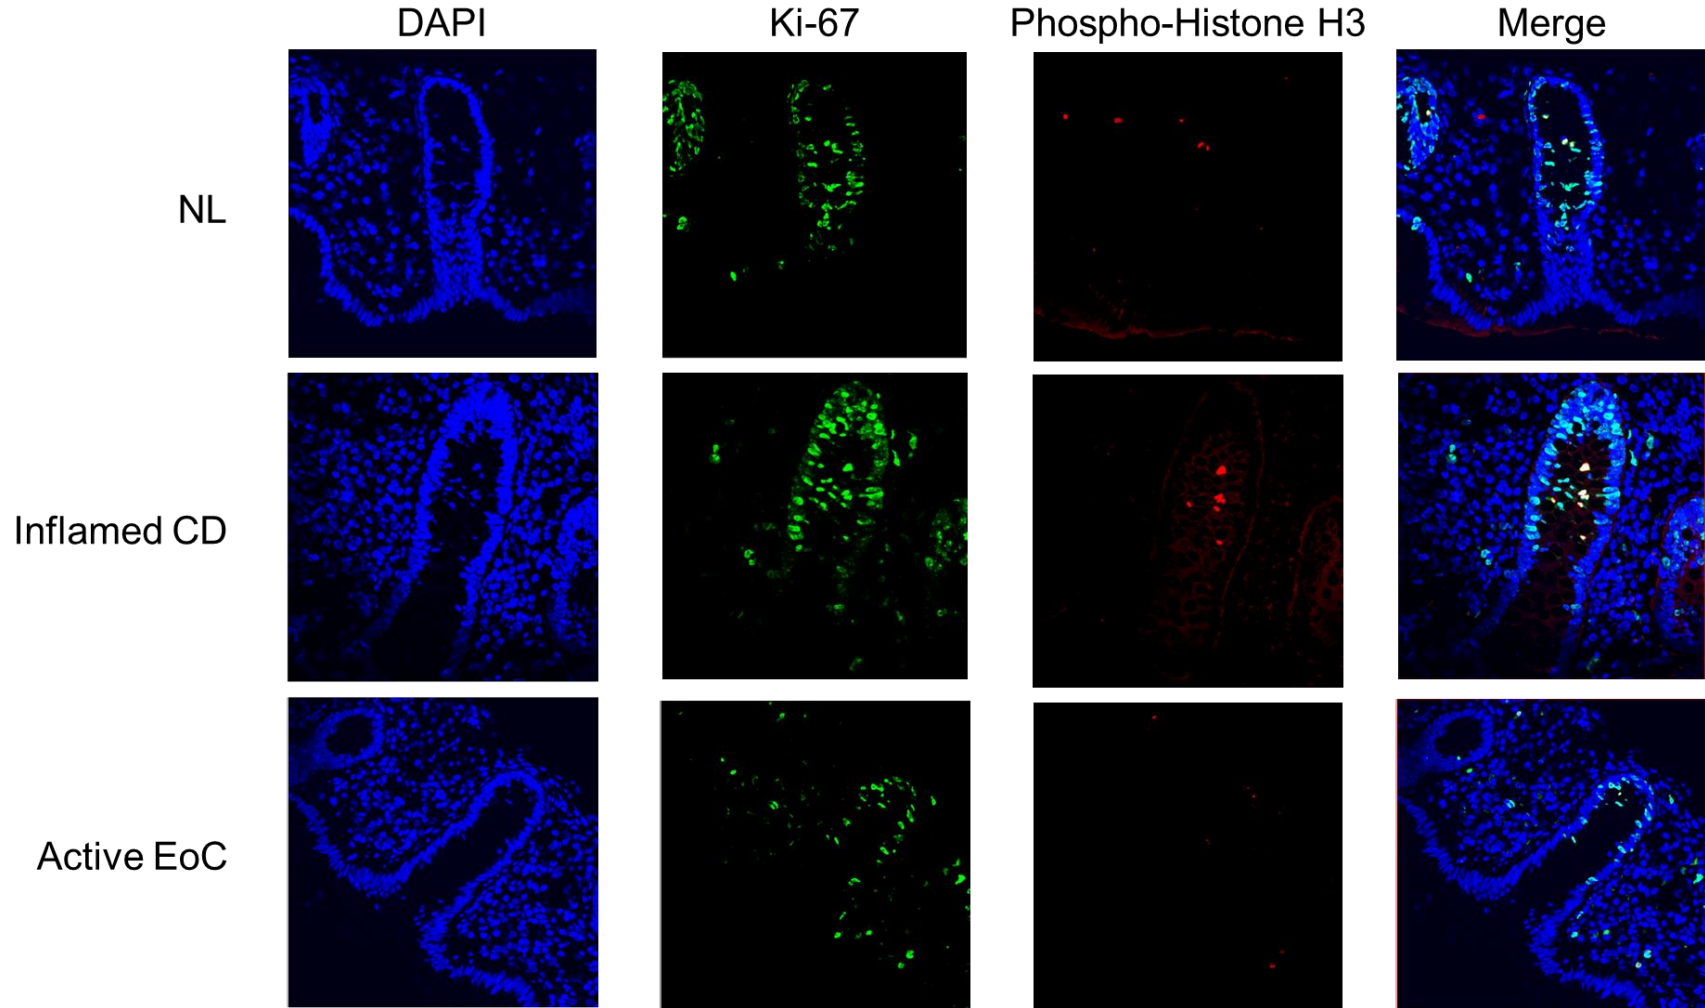

**Supplementary Figure 5. Immunofluorescence staining of colonic biopsy.** Representative images of colonic biopsy sections for Ki-67 (cyan) and Phospho-Histone H3 (red) with DAPI-stained nuclei (blue); sections from normal control individuals (NL) (N = 7), patients with inflamed CD (N = 6), and patients with active EoC (N = 8). CD, Crohn disease; DAPI, 4',6-diamidino-2-phenylindole; EoC, eosinophilic colitis; NL, normal controls.

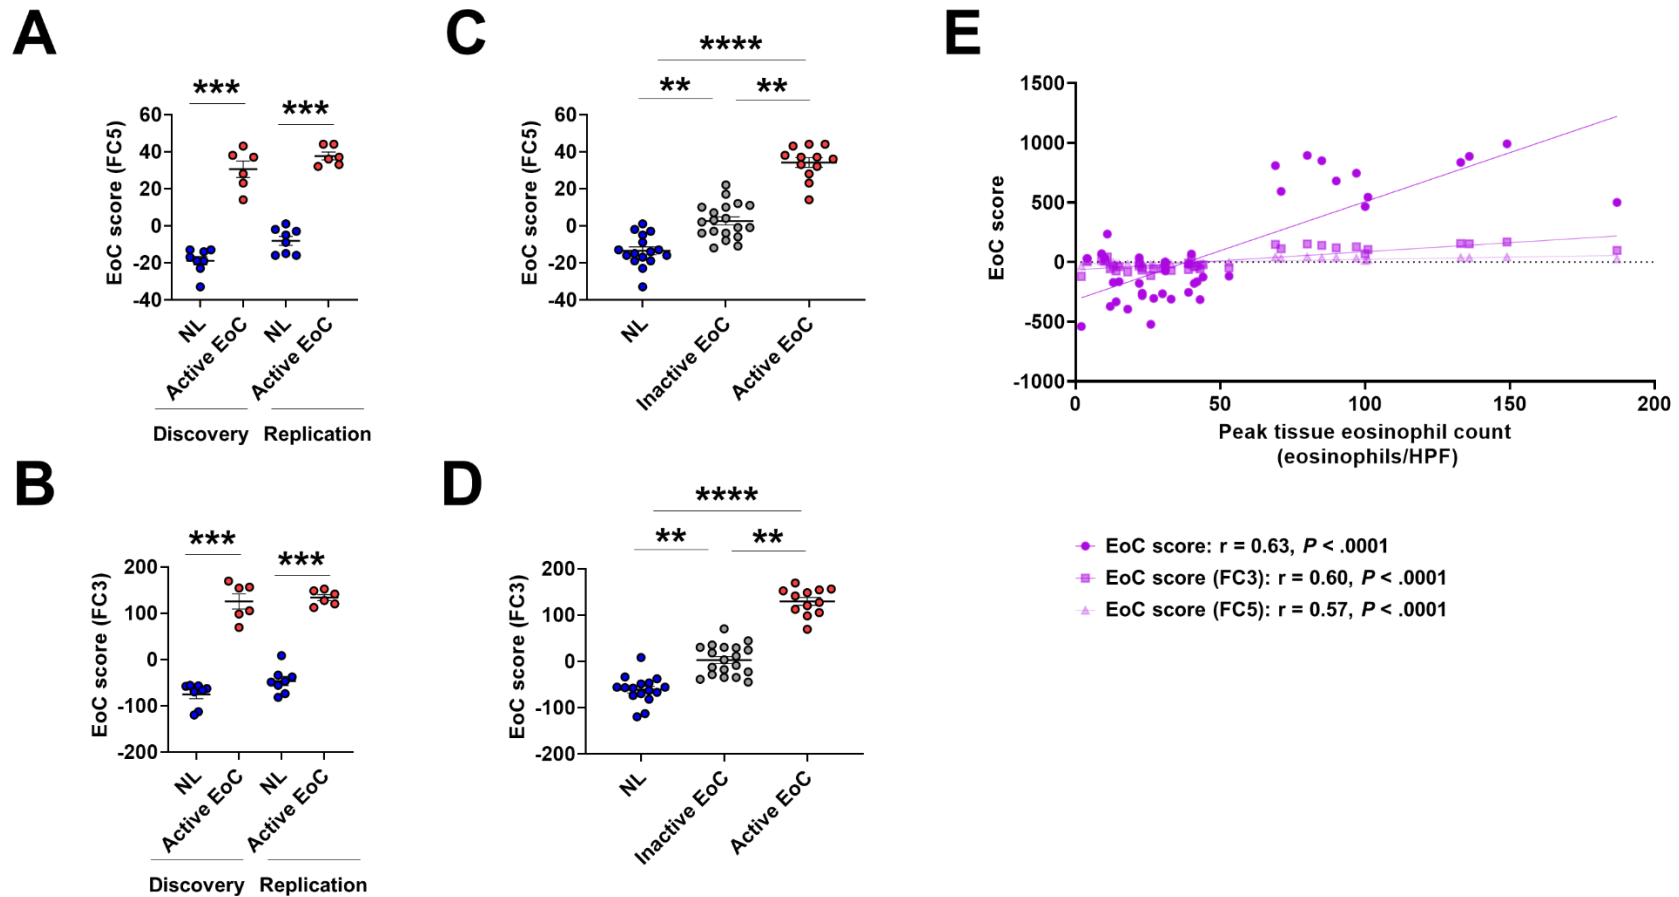

**Supplementary Figure 6. EoC scores by several cut-offs.** A–B, Discovery and replication of the EoC score with independent patients and from different colon sites (discovery: ascending, replication: descending/sigmoid colon). EoC score based on FC >3 (A) and FC >5 (B) are shown. Data are mean  $\pm$  SEM. \*\*\* $P < .001$ , using Mann–Whitney  $U$  test. C–D, EoC score as a function of disease activity in EoC. EoC score based on FC >3 (C) and FC >5 (D) are shown. Data are mean  $\pm$  SEM. \*\* $P < .01$ , \*\*\* $P < .001$ , and \*\*\*\* $P < .0001$ , using Kruskal–Wallis test followed by Dunn multiple-comparison test. E, Spearman correlation plots for peak colonic eosinophil count and EoC scores. EoC, eosinophilic colitis; CD, Crohn disease; NL, normal; HPF, high-power microscopic field; SEM, standard error of mean, FC; fold change.

## Supplementary Materials and Methods

### Study Design and Participants

This study was conducted in the Consortium of Eosinophilic Gastrointestinal Diseases Researchers (CEGIR),<sup>1</sup> a national collaborative network of academic centers caring for and researching adults and children with Eosinophilic gastrointestinal diseases (EGIDs). The CEGIR observational study, Outcome Measures in Eosinophilic Gastrointestinal disorders Across the ages (OMEGA), is a longitudinal cohort study aimed at understanding the natural history of eosinophilic esophagitis (EoE), eosinophilic gastritis (EoG), eosinophilic duodenitis (EoD), eosinophilic gastroenteritis (EGE), and eosinophilic colitis (EoC) during routine clinical care. Demographic, clinical, endoscopic, and histologic data and gastrointestinal (GI) tissue and peripheral blood samples, were prospectively collected starting from 2015; all samples from any CEGIR site that contributed subjects with EoC were used (n = 5 sample-providing institutions). The clinical features of subjects were determined during a standard-of-care evaluation using standardized intake forms. All subjects' clinical data were stored at the Rare Diseases Clinical Research Network (RDCRN) Data Management and Coordinating Center (University of South Florida in Tampa, FL [2015-2019] and Cincinnati Children's Hospital Medical Center [CCHMC; 2020–2024]).

Pediatric subjects were defined as having an age of less than 18 years. Atopy was defined on the basis of self-report of allergic rhinitis, atopic dermatitis, asthma, or food allergy. Subjects were defined as having EoC if they had a history of colonic eosinophilia (ascending colon  $\geq 100$  eosinophils/high-power field [HPF], descending colon  $\geq 85$  eosinophils/HPF, and/or sigmoid colon  $\geq 65$  eosinophils/HPF) without other known causes of GI eosinophilia; negative tests typically included stool culture for pathogenic bacteria or parasites, viral antibody titers and/or PCR, and Celiac and inflammatory bowel disease serology.<sup>2</sup> A 2X the upper limit of normal for each anatomic site in normal biopsies was used as the thresholds for the definitions of colonic eosinophilia.<sup>2-5</sup> Active EoC was defined as colonic biopsies that met the above criteria, and inactive EoC was defined as  $< 100$  eosinophils/HPF for ascending colon,  $< 85$  eosinophils/HPF in descending colon and/or  $< 65$  eosinophils/HPF for sigmoid colon in subjects with a previous history of EoC. Subjects with EoC with GI eosinophilia outside of the colon (esophagus:  $\geq 15$  eosinophils/HPF, stomach:  $\geq 30$  eosinophils/HPF in at least 5 HPF) were included.

Non-EoC control subjects (normal [NL], Crohn disease [CD]) from the Cincinnati Center for Eosinophilic Disorders (CCED) EGID database between 2015–2019 included children and adults who had undergone endoscopy, had no history of EoC nor pathologic evidence of EoC surveyed during the index endoscopy, and had colonic biopsies collected for research purposes during the index endoscopy. NL were not healthy volunteers, but instead were patients who underwent endoscopic examination due to digestive symptoms but did not show colonic eosinophilia. NL subjects having treatments because of concomitant diseases [e.g., gastroesophageal reflux disease (GERD) and IgE-mediated food allergy] were not excluded. A diagnosis of CD for this study was made using previously published guidelines.<sup>6</sup> Features may include a variable combination of the following: (1) Clinical signs and symptoms including abdominal pain, diarrhea, rectal bleeding, growth delay, and pubertal delay; (2) Physical findings including abdominal tenderness, perirectal skin tags, perirectal fistula, and erythema nodosum; (3) Endoscopic findings of aphthous, linear or stellate ulcerations, cobble stoning, skip lesions, and strictures in the ileum or colon; (4) Histologic findings including ulceration, crypt abscesses, non-caseating granuloma, focal changes within biopsy, and patchy inflammation, and (5) Cross-sectional imaging findings including mural thickening, hyperemia, abnormal luminal caliber, altered peristalsis, fibro-fatty proliferation, regional lymphadenopathy, and sinus tracts/fistulae. Diagnosis and disease activity of CD was based on a combination of the clinical, endoscopic, and histologic characteristics by gastroenterologists and pathologists at CCHMC. The inflammation status of subjects (inflamed or non-inflamed) was defined by the assessment of histologic features of chronicity and quantitated acute inflammation. A subset of patients with CD who also had a high peak colonic eosinophils/HPF ( $\geq 65$  eosinophils/HPF) was defined as CD-high colonic eosinophils.

This study was approved by the institutional review boards of the participating institutions via a central institutional review board at CCHMC. An informed consent/assent form was signed by the subjects and/or their legal guardians per institutional guidelines prior to inclusion in the study. Study participants were also made aware that their involvement in the study was voluntary and that their declination to participate did not interfere with their standard of care.

## **Molecular Evaluation**

Fresh biopsy specimens collected from subjects with EoC and controls were stored in RNAlater until they were subjected to RNA isolation using the miRNeasy kit (Qiagen, Valencia, Calif) per the manufacturer's instructions. The RNA concentration was measured by Nanodrop, and the RNA integrity number (RIN) was determined by the Gene Expression Core at CCHMC using the Agilent Bioanalyzer. Samples for RNA sequencing were selected from the total cohort on the basis of RNA quality and quantity. RNA sequencing was performed with high-quality RNA (RIN > 8) using the QuantSeq 3' mRNA Seq Library Prep Kit FWD for Illumina (Lexogen). Libraries were subjected to quality control and concentration measurements at the Gene Expression Core at CCHMC. Libraries were diluted to a final concentration of 5 nM and sequenced on a HiSeq 4000 Illumina sequencing machine at the Genomics & Cell Characterization Core Facility at the University of Oregon with single reads of 100–150 bp. Data were aligned to the GRCh37 build of the human genome using the Ensembl annotations. Data analyses, including principal component analysis (PCA) and hierarchical clustering, were performed using DESeq2 in CLC Genomics Workbench software (CLC bio, Waltham, MA, USA) and GeneSpring software ver. 14.9 (Agilent Technologies). Transcripts per kilobase million (TPM) were assessed for statistical significance using a Welch *t* test with Benjamini–Hochberg false-discovery rate (FDR), threshold of  $P < .05$ , and 1.5-fold-change cut-off filter. Data are available at EGIDExpress (<https://egidexpress.research.cchmc.org/data/>).

Gene ontology enrichment analysis was performed with the ToppGene suite and CluGO.<sup>7, 8</sup> Cell type enrichment analysis was performed with xCell.<sup>9</sup> EoC score was calculated by summing the normalized expression values of the dysregulated genes of the EoC transcriptomes, respectively. Of note, the EoC score calculated from the EoC transcriptome positively correlated with disease severity.

A real-time reverse-transcription quantitative polymerase chain reaction (RT-qPCR) array platform was performed to determine mucosal expression of genes associated with type 2 inflammation in patients with EGIDs. As type 2 inflammation, 7 genes [eosinophils (*CLC*), mast cells (*HPGDS*), chemokines/cytokines (*CCL11*, *CCL26*, *IL13*, *IL4*, *IL5*)] were assessed. Patients' biopsies [esophagus (EoE n=82, NL n=50),<sup>10</sup> stomach (EoG n=21, NL n=20),<sup>11</sup> colon (EoC n=12, NL n=16)] were assessed by the EoE Diagnostic Panel (EDP)<sup>10</sup> or EoG Diagnostic Panel (EGDP)<sup>11</sup>

with normalization to the housekeeping gene glyceraldehyde-3-phosphate dehydrogenase (*GAPDH*).

As another relevant disease control, publicly available colonic transcriptome datasets from patients with ulcerative colitis (UC) having active colitis and patient clinical data were comprehensively searched and obtained by the BaseSpace correlation engine (Illumina Inc., San Diego, CA, USA).<sup>12</sup>

## **Histologic Features**

Colonic biopsies were assessed for the peak eosinophil counts and other histologic features of EoC. Hematoxylin and eosin (H&E)-stained biopsy slides from NL, CD, and EoC were blindly reviewed by CEGIR pathologists (M.H.C., K.E.C., G.Y.). Standardization across centers was performed. CEGIR central review pathologists reviewed images of slides that had been scanned (Aperio scanner) at 40X magnification. Each pathologist used the same annotation to count eosinophils/hpf. The annotation was created for the purpose of counting eosinophils in a view finder that mimicked a round high-power field and measured 0.27 mm<sup>2</sup>, an area that is commonly covered at 40X magnification. Histologic features in images of all submitted colon biopsies were as follows: acute crypt abscess, acute cryptitis, acute inflammation, crypt architectural abnormalities, crypt dropout/loss, crypt epithelial injury, crypts partly destroyed by eosinophilic inflammation, eosinophil crypt abscess, eosinophil cryptitis, eosinophils in muscularis mucosa/submucosa, eosinophils in surface epithelium, granulomas, lamina propria eosinophil sheets, lymphocytes in surface epithelium, overall eosinophilic inflammation, pericryptal circumferential eosinophil collars, subcryptal eosinophil aggregates, subcryptal lymphoplasmacytes, and surface epithelial injury. Each feature was scored using a 3-point scale (0 = absent, 1 = mild/moderate, 2 = marked) (Supplementary Table S3).

## **Immunohistochemical and immunofluorescent staining**

Immunohistochemical stains with the Ki-67 (a proliferation marker, 790-4286, Roche) or cleaved caspase-3 (an apoptotic marker, ab2302, Abcam) in colonic biopsies were performed at the Pathology Research Core at CCHMC using the Ventana BenchMark XT automated immunostainer

(Ventana Medical Systems, Inc., Tuscon, AZ). No signal was observed in biopsies stained with negative control IgG antibodies. Stained biopsy slides from NL, CD, and EoC were blindly reviewed by an expert pathologist (M.H.C.). Immunofluorescent staining was performed as previously described,<sup>13</sup> using the following primary antibodies (1:100 dilution): Ki67 (MA5-14520; Invitrogen) and phospho-histone H3 (#9706; Cell Signaling Technology). The nuclei were stained with DAPI. The slides were blocked with PBS with 10% donkey serum. The secondary antibodies (1:400 dilution) used were donkey anti-mouse Alexa Fluor 570 or donkey anti-rabbit Alexa Fluor 488 (Invitrogen). Imaging was performed with a Nikon A1 inverted confocal microscope.

### **Statistical Analysis**

Statistical analyses were performed using the JMP v13.2.1 (SAS Institute, Cary, NC), CLC Genomics Workbench software (CLC bio, Waltham, MA, USA), GeneSpring GX 14.9 (Agilent Technologies, Santa Clara, CA), and GraphPad Prism 9 (GraphPad Software, Inc., San Diego, CA). Data are presented as n (%) or median (interquartile range [IQR]) unless otherwise stated. Missing data were excluded from all formal statistical analyses. Nonparametric correlation analysis was performed using Spearman's rank correlation coefficient. For continuous data, statistical significance comparing 2 different groups was determined by the Mann-Whitney *U* test (nonparametric test, 2 groups) or the Kruskal-Wallis test followed by a Dunn multiple-comparison test (nonparametric test, 3 groups or more). Benjamini-Hochberg correction was applied for multiple testing to control the FDR. For categorical data, the chi-square test was used to ascertain differences. A significant *P* value was defined as less than 0.05.

## References

1. Gupta SK, Falk GW, Aceves SS, et al. Consortium of Eosinophilic Gastrointestinal Disease Researchers: Advancing the Field of Eosinophilic GI Disorders Through Collaboration. *Gastroenterology* 2019;156:838-842.
2. Collins MH. Histopathologic features of eosinophilic esophagitis and eosinophilic gastrointestinal diseases. *Gastroenterol Clin North Am* 2014;43:257-68.
3. DeBrosse CW, Case JW, Putnam PE, et al. Quantity and distribution of eosinophils in the gastrointestinal tract of children. *Pediatr Dev Pathol* 2006;9:210-8.
4. Pesek RD, Greuter T, Lopez-Nunez O, et al. Clinicopathologic Correlations in Eosinophilic Gastrointestinal Disorders. *J Allergy Clin Immunol Pract* 2021;9:3258-3266.
5. Raffaele A, Vatta F, Votto M, et al. Eosinophilic colitis in children: a new and elusive enemy? *Pediatr Surg Int* 2021;37:485-490.
6. Bousvaros A, Antonioli DA, Colletti RB, et al. Differentiating ulcerative colitis from Crohn disease in children and young adults: report of a working group of the North American Society for Pediatric Gastroenterology, Hepatology, and Nutrition and the Crohn's and Colitis Foundation of America. *J Pediatr Gastroenterol Nutr* 2007;44:653-74.
7. **Bindea G, Mlecnik B**, Hackl H, et al. ClueGO: a Cytoscape plug-in to decipher functionally grouped gene ontology and pathway annotation networks. *Bioinformatics* 2009;25:1091-3.
8. Chen J, Bardes EE, Aronow BJ, et al. ToppGene Suite for gene list enrichment analysis and candidate gene prioritization. *Nucleic Acids Res* 2009;37:W305-11.
9. Aran D, Hu Z, Butte AJ. xCell: digitally portraying the tissue cellular heterogeneity landscape. *Genome Biol* 2017;18:220.
10. Wen T, Stucke EM, Grotjan TM, et al. Molecular diagnosis of eosinophilic esophagitis by gene expression profiling. *Gastroenterology* 2013;145:1289-99.
11. Shoda T, Wen T, Caldwell JM, et al. Molecular, endoscopic, histologic, and circulating biomarker-based diagnosis of eosinophilic gastritis: Multi-site study. *J Allergy Clin Immunol* 2020;145:255-269.
12. Kupersmidt I, Su QJ, Grewal A, et al. Ontology-based meta-analysis of global collections of high-throughput public data. *PLoS One* 2010;5.
13. **Travers J, Rochman M**, Caldwell JM, et al. IL-33 is induced in undifferentiated, non-dividing esophageal epithelial cells in eosinophilic esophagitis. *Sci Rep* 2017;7:17563.

Author names in bold designate shared co-first authorship.



**Supplementary Table 1.** Number of subjects with EoC from each site

| <b>Number of samples</b>                        | <b>Total<br/>N = 31</b> | <b>Inactive EoC<br/>N = 19</b> | <b>Active EoC<br/>N = 12</b> |
|-------------------------------------------------|-------------------------|--------------------------------|------------------------------|
| Children's Hospital Colorado                    | 7                       | 6                              | 1                            |
| Cincinnati Children's Hospital Medical Center   | 20                      | 10                             | 10                           |
| National Institutes of Health                   | 1                       | 1                              | 0                            |
| Northwestern University                         | 2                       | 1                              | 1                            |
| University of North Carolina School of Medicine | 1                       | 1                              | 0                            |

EoC, eosinophilic colitis

**Supplementary Table 2.** Inclusion/exclusion criteria, thresholds of eosinophilia, and definition of disease activity for EoC

| <b>Inclusion/Exclusion criteria</b>                                                                                                                                                                                                                                                                                                                                                                                                                                                                                                                                                                                     |                        |                                                                                                                                                                                                                                                                                                                                                                                                                                                                                                                                                                                                                                                                                                                                                                                                                                                                                                                                                                                                                                                                                                                                                                                                                                                              |                                |
|-------------------------------------------------------------------------------------------------------------------------------------------------------------------------------------------------------------------------------------------------------------------------------------------------------------------------------------------------------------------------------------------------------------------------------------------------------------------------------------------------------------------------------------------------------------------------------------------------------------------------|------------------------|--------------------------------------------------------------------------------------------------------------------------------------------------------------------------------------------------------------------------------------------------------------------------------------------------------------------------------------------------------------------------------------------------------------------------------------------------------------------------------------------------------------------------------------------------------------------------------------------------------------------------------------------------------------------------------------------------------------------------------------------------------------------------------------------------------------------------------------------------------------------------------------------------------------------------------------------------------------------------------------------------------------------------------------------------------------------------------------------------------------------------------------------------------------------------------------------------------------------------------------------------------------|--------------------------------|
| <b>Inclusion</b>                                                                                                                                                                                                                                                                                                                                                                                                                                                                                                                                                                                                        |                        | <b>Exclusion</b>                                                                                                                                                                                                                                                                                                                                                                                                                                                                                                                                                                                                                                                                                                                                                                                                                                                                                                                                                                                                                                                                                                                                                                                                                                             |                                |
| <ul style="list-style-type: none"> <li>• Presence of symptoms; symptoms include (but are not limited to) hematochezia, bloody/non-bloody diarrhea, tenesmus, and abdominal pain</li> <li>• A history of one of the following at the time of biopsy               <ol style="list-style-type: none"> <li>1) anemia</li> <li>2) peripheral eosinophilia</li> <li>3) hemooccult positive stool</li> <li>4) EGID</li> <li>5) allergic diseases (allergic rhinitis, asthma, food allergy, eczema or other allergic features suggestive of atopic disease)</li> </ol> </li> <li>• Mucosal eosinophilia (see below)</li> </ul> |                        | <ul style="list-style-type: none"> <li>• History of intestinal surgery other than G tube placement</li> <li>• Planned or recent enrollment in blinded investigational studies</li> <li>• Other identifiable potential causes for eosinophilia except for IBD (CD and UC). In the case of IBD, investigators will review the clinical history, serology, and accompanying biopsies to determine if the diagnosis captures IBD diagnosis in the context of the histologic finding of mucosal eosinophilia. If the assessment suggests that the subject clearly has IBD, the subject will not be enrolled. If the assessment suggests that the patient may have EoC, then the potential participant could enroll if all other inclusion/exclusion criteria are met.</li> <li>• Any physical, mental, or social condition, history or concurrent illness or laboratory abnormality that, in the investigator's judgement, might interfere with study procedures or the ability of the subject to adhere to and complete the study</li> <li>• Potential participants will be excluded if the investigator determines that the potential participant has diminished capacity and is not cognitively able to participate fully in the consenting process</li> </ul> |                                |
| <b>Thresholds of mucosal eosinophilia in the GI tract</b>                                                                                                                                                                                                                                                                                                                                                                                                                                                                                                                                                               |                        |                                                                                                                                                                                                                                                                                                                                                                                                                                                                                                                                                                                                                                                                                                                                                                                                                                                                                                                                                                                                                                                                                                                                                                                                                                                              |                                |
| <b>Location</b>                                                                                                                                                                                                                                                                                                                                                                                                                                                                                                                                                                                                         | <b>Sites of biopsy</b> | <b>Thresholds</b>                                                                                                                                                                                                                                                                                                                                                                                                                                                                                                                                                                                                                                                                                                                                                                                                                                                                                                                                                                                                                                                                                                                                                                                                                                            | <b>Diagnosis</b>               |
| Esophagus                                                                                                                                                                                                                                                                                                                                                                                                                                                                                                                                                                                                               | Distal, proximal       | ≥15 eosinophils/HPF                                                                                                                                                                                                                                                                                                                                                                                                                                                                                                                                                                                                                                                                                                                                                                                                                                                                                                                                                                                                                                                                                                                                                                                                                                          | Eosinophilic esophagitis (EoE) |
| Stomach                                                                                                                                                                                                                                                                                                                                                                                                                                                                                                                                                                                                                 | Antrum, body, fundus   | ≥30 eosinophils/HPF in 5 HPF                                                                                                                                                                                                                                                                                                                                                                                                                                                                                                                                                                                                                                                                                                                                                                                                                                                                                                                                                                                                                                                                                                                                                                                                                                 | Eosinophilic gastritis (EoG)   |
| Colon                                                                                                                                                                                                                                                                                                                                                                                                                                                                                                                                                                                                                   | Ascending              | ≥100 eosinophils/HPF                                                                                                                                                                                                                                                                                                                                                                                                                                                                                                                                                                                                                                                                                                                                                                                                                                                                                                                                                                                                                                                                                                                                                                                                                                         | Eosinophilic colitis (EoC)     |
|                                                                                                                                                                                                                                                                                                                                                                                                                                                                                                                                                                                                                         | Descending             | ≥85 eosinophils/HPF                                                                                                                                                                                                                                                                                                                                                                                                                                                                                                                                                                                                                                                                                                                                                                                                                                                                                                                                                                                                                                                                                                                                                                                                                                          |                                |
|                                                                                                                                                                                                                                                                                                                                                                                                                                                                                                                                                                                                                         | Sigmoid                | ≥65 eosinophils/HPF                                                                                                                                                                                                                                                                                                                                                                                                                                                                                                                                                                                                                                                                                                                                                                                                                                                                                                                                                                                                                                                                                                                                                                                                                                          |                                |
| <b>Definition of disease activity in EoC</b>                                                                                                                                                                                                                                                                                                                                                                                                                                                                                                                                                                            |                        |                                                                                                                                                                                                                                                                                                                                                                                                                                                                                                                                                                                                                                                                                                                                                                                                                                                                                                                                                                                                                                                                                                                                                                                                                                                              |                                |
| <b>Location</b>                                                                                                                                                                                                                                                                                                                                                                                                                                                                                                                                                                                                         | <b>Sites of biopsy</b> | <b>Active state</b>                                                                                                                                                                                                                                                                                                                                                                                                                                                                                                                                                                                                                                                                                                                                                                                                                                                                                                                                                                                                                                                                                                                                                                                                                                          | <b>Inactive state</b>          |
| Colon                                                                                                                                                                                                                                                                                                                                                                                                                                                                                                                                                                                                                   | Ascending              | ≥100 eosinophils/HPF                                                                                                                                                                                                                                                                                                                                                                                                                                                                                                                                                                                                                                                                                                                                                                                                                                                                                                                                                                                                                                                                                                                                                                                                                                         | <100 eosinophils/HPF           |
|                                                                                                                                                                                                                                                                                                                                                                                                                                                                                                                                                                                                                         | Descending             | ≥85 eosinophils/HPF                                                                                                                                                                                                                                                                                                                                                                                                                                                                                                                                                                                                                                                                                                                                                                                                                                                                                                                                                                                                                                                                                                                                                                                                                                          | <85 eosinophils/HPF            |
|                                                                                                                                                                                                                                                                                                                                                                                                                                                                                                                                                                                                                         | Sigmoid                | ≥65 eosinophils/HPF                                                                                                                                                                                                                                                                                                                                                                                                                                                                                                                                                                                                                                                                                                                                                                                                                                                                                                                                                                                                                                                                                                                                                                                                                                          | <65 eosinophils/HPF            |

CD, Crohn disease; EoC, eosinophilic colitis; EoG, eosinophilic gastritis; EGID, eosinophilic gastrointestinal disorder; EoE, eosinophilic esophagitis; GI, gastrointestinal; HPF, high-power microscopic field; IBD, inflammatory bowel disease; UC, ulcerative colitis.

**Supplementary Table 3.** Definitions of EoC histologic features

| <b>Features</b>                     | <b>Definition</b>                                                                                                                            | <b>Mild/moderate</b>                                                                                            | <b>Marked</b>                                                               |
|-------------------------------------|----------------------------------------------------------------------------------------------------------------------------------------------|-----------------------------------------------------------------------------------------------------------------|-----------------------------------------------------------------------------|
| Overall eosinophilic inflammation   | Estimate overall eosinophilic inflammation                                                                                                   | ≤ 50% of HPF contain 65 or more eosinophils                                                                     | > 50% of HPF contain 65 or more eosinophils                                 |
| Lamina propria eosinophil sheets    | Contiguous eosinophils that form masses in the lamina propria and may increase intercryptal distance                                         | Contiguous eosinophil masses without increased intercryptal distance                                            | Contiguous eosinophil masses with increased intercryptal distance           |
| Pericryptal circumferential collars | At least one layer of eosinophils that surround ≥3/4 of circumference of crypt cut in cross section or entire base of a crypt cut lengthwise | Single layer of eosinophils forms collar                                                                        | More than 1 layer of eosinophils forms collar                               |
| Eosinophils in surface epithelium   | Eosinophils in surface epithelium                                                                                                            | 3-5 eosinophils/100 surface colonocytes                                                                         | > 5 eosinophils/100 surface colonocytes or any size of group of eosinophils |
| Lymphocytes in surface epithelium   | Lymphocytes in surface epithelium                                                                                                            | < 10 IEL/100 surface colonocytes                                                                                | > 10 IEL/100 surface colonocytes                                            |
| Surface epithelial injury           | Surface colonocytes that do not appear homogeneous or intact                                                                                 | Vacuolization, flattening or mucin depletion in epithelial cells that are attached to underlying lamina propria | Detached injured epithelial cells                                           |
| Eosinophil cryptitis                | Eosinophils in crypt epithelium ± eosinophils in lumen                                                                                       | < 20 eosinophils/crypt                                                                                          | ≥ 20 eosinophils/crypt or any size of group of eosinophils                  |
| Eosinophil crypt abscess            | Dilated crypt lined by attenuated epithelium with eosinophils in pericryptal lamina propria, crypt epithelium, and crypt lumen               | ≤ 10% of crypts                                                                                                 | > 10% of crypts                                                             |
| Acute cryptitis                     | Intraepithelial acute inflammatory cells in any quantity of crypts                                                                           | Focal infiltration by acute inflammatory cells                                                                  | Circumferential infiltration by acute inflammatory cells                    |
| Acute crypt abscess                 | Dilated crypt lined by attenuated epithelium with acute inflammatory cells in pericryptal                                                    | ≤ 10% of crypts                                                                                                 | > 10% of crypts                                                             |

|                                                      |                                                                                                                                         |                    |                    |
|------------------------------------------------------|-----------------------------------------------------------------------------------------------------------------------------------------|--------------------|--------------------|
|                                                      | lamina propria, crypt epithelium, and crypt lumen                                                                                       |                    |                    |
| Subcryptal eosinophil aggregates                     | Groups of 5 or more contiguous eosinophils in lamina propria between crypt base and muscularis mucosa                                   | ≤ 10% of crypts    | > 10% of crypts    |
| Subcryptal lymphoplasmacytosis                       | Groups or aggregates of plasma cells or lymphocytes situated between the crypt base and the muscularis mucosa                           | Affects ≤ 5 crypts | Affects > 5 crypts |
| Eosinophils in muscularis mucosa/submucosa           | Eosinophils in muscularis mucosa/submucosa                                                                                              | Found in ≤ 5 HPF   | Found in > 5 HPF   |
| Crypt architectural abnormalities                    | Elongated crypts, branched crypts, tortuous crypts, atrophic/missing crypts, etc.                                                       | ≤ 10% of crypts    | > 10% of crypts    |
| Crypt dropout/loss                                   | Intercryptal distance is at least doubled                                                                                               | ≤ 5 foci           | > 5 foci           |
| Crypts partly destroyed by eosinophilic inflammation | Any loss of crypt integrity associated with eosinophils, usually part of a crypt wall is missing and eosinophils are in/near the breach | ≤ 10% of crypts    | > 10% of crypts    |
| Crypt epithelial injury                              | Vacuolization, flattening or mucin depletion in crypt epithelial cells                                                                  | Found in ≤ 5 HPF   | Found in > 5 HPF   |
| Acute inflammation                                   | Acute inflammatory cells in lamina propria                                                                                              | Found in ≤ 5 HPF   | Found in > 5 HPF   |
| Granulomas                                           | Epithelioid non-necrotizing granulomas in any part of biopsy                                                                            | Found in ≤ 5 HPF   | Found in > 5 HPF   |

EoC, eosinophilic colitis; HPF, high-power microscopic field; IEL, intraepithelial lymphocytes.

**Supplementary Table 4.** Demographic and clinical characteristics of study subjects

|                           |                       | NL               | Inactive EoC     | Active EoC      | Inflamed CD      | CD with high eosinophils |
|---------------------------|-----------------------|------------------|------------------|-----------------|------------------|--------------------------|
| No. of subjects           |                       | 8                | 16               | 11              | 6                | 5                        |
| Demographics              |                       |                  |                  |                 |                  |                          |
| Age at biopsy (years)     |                       | 15.1 (10.4–17.2) | 16.0 (12.4–23.6) | 11.2 (7.6–14.2) | 17.7 (12.8–19.9) | 17.5 (14.1–20.5)         |
| Gender                    | Male                  | 1 (12.5%)        | 8 (50.0%)        | 6 (54.5%)       | 4 (66.7%)        | 2 (40.0%)                |
| Race                      | White                 | 7 (87.5%)        | 15 (93.8%)       | 10 (90.9%)      | 6 (100%)         | 5 (100%)                 |
| Colonic eosinophil counts |                       |                  |                  |                 |                  |                          |
|                           | Peak (eos/HPF)        | 28.5 (23.8–37.5) | 22 (10.5–40)     | 100 (80–136)    | 40.5 (23.3–59.8) | 101 (73–106.5)           |
|                           | Range                 | 2–43             | 9–42             | 69 – 187        | 15–62            | 66–110                   |
| History of EGID           |                       |                  |                  |                 |                  |                          |
|                           | EoE                   | -                | 6 (37.5%)        | 9 (81.8%)       | -                | -                        |
|                           | EoG                   | -                | 3 (18.8%)        | 2 (18.2%)       | -                | -                        |
|                           | EoC                   | -                | 16 (100%)        | 11 (100%)       | -                | -                        |
| Atopic status             |                       |                  |                  |                 |                  |                          |
|                           | Atopy (any)           | 4 (50.0%)        | 7 (43.8%)        | 8 (72.7%)       | 3 (50.0%)        | 4 (80.0%)                |
|                           | Asthma                | 2 (25.0%)        | 0 (0%)           | 6 (54.5%)       | 1 (16.7%)        | 1 (20.0%)                |
|                           | Allergic rhinitis     | 3 (37.5%)        | 4 (25.0%)        | 7 (63.6%)       | 2 (33.3%)        | 4 (80.0%)                |
|                           | Eczema                | 2 (25.0%)        | 3 (18.8%)        | 6 (54.5%)       | 0 (0%)           | 1 (20.0%)                |
|                           | Food allergy          | 0 (0%)           | 4 (25.0%)        | 3 (27.3%)       | 0 (0%)           | 0 (0%)                   |
| Treatment at biopsy       |                       |                  |                  |                 |                  |                          |
|                           | Ongoing diet therapy  | 1 (12.5%)        | 9 (56.3%)        | 3 (27.3%)       | 1 (16.7%)        | 1 (20.0%)                |
|                           | Proton pump inhibitor | 4 (50.0%)        | 2 (12.5%)        | 7 (63.6%)       | 0 (0%)           | 0 (0%)                   |
|                           | Topical steroids      | 0 (0%)           | 4 (25.0%)        | 4 (36.4%)       | 0 (0%)           | 0 (0%)                   |
|                           | Systemic steroids     | 0 (0%)           | 1 (6.3%)         | 1 (9.1%)        | 2 (33.3%)        | 0 (0%)                   |
|                           | Immune modulator      | 0 (0%)           | 0 (0%)           | 0 (0%)          | 3 (50.0%)        | 1 (20.0%)                |
|                           | Biologics             | 0 (0%)           | 0 (0%)           | 0 (0%)          | 4 (66.7%)        | 4 (80.0%)                |

\*Data are n (%) or median (interquartile range [IQR]) unless otherwise stated.

CD, Crohn disease; EoC, eosinophilic colitis; EoG, eosinophilic gastritis; EGID, eosinophilic gastrointestinal disorder; EoE, eosinophilic esophagitis; eos/HPF, eosinophils per high-power microscopic field; NL, normal.

**Supplementary Table 5.** List of genes in EoC and CD transcriptomes in colon biopsies

| EoC transcriptome<br>(Active EoC vs NL) |      |                       | Correlation with peak<br>colonic eosinophil<br>counts |                       | CD transcriptome<br>(Inflamed CD vs NL) |      |                       | Correlation with peak<br>colonic eosinophil counts |                       |
|-----------------------------------------|------|-----------------------|-------------------------------------------------------|-----------------------|-----------------------------------------|------|-----------------------|----------------------------------------------------|-----------------------|
| Gene<br>Symbol                          | FC   | FDR <i>P</i><br>value | Spearman <i>r</i>                                     | FDR <i>P</i><br>value | Gene<br>Symbol                          | FC   | FDR <i>P</i><br>value | Spearman <i>r</i>                                  | FDR <i>P</i><br>value |
| <i>CLC</i>                              | 10.2 | 4.2E-03               | 0.77                                                  | 4.5E-05               | <i>SAA1</i>                             | 19.3 | 1.3E-03               | 0.35                                               | 2.3E-01               |
| <i>GPA33</i>                            | 8.8  | 7.0E-03               | 0.47                                                  | 2.9E-02               | <i>DMBT1</i>                            | 14.8 | 1.5E-02               | -0.06                                              | 8.7E-01               |
| <i>IFITM1</i>                           | 8.3  | 1.3E-02               | 0.61                                                  | 3.0E-03               | <i>DUOX2</i>                            | 14.3 | 1.3E-02               | 0.01                                               | 9.8E-01               |
| <i>MRNIP</i>                            | 7.6  | 3.7E-03               | 0.24                                                  | 2.4E-01               | <i>TNFRSF6B</i>                         | 11.0 | 3.8E-04               | 0.18                                               | 5.7E-01               |
| <i>MT1H</i>                             | 7.3  | 2.8E-02               | 0.18                                                  | 3.7E-01               | <i>NOS2</i>                             | 10.4 | 1.4E-03               | -0.05                                              | 8.9E-01               |
| <i>ESRRA</i>                            | 6.6  | 4.2E-03               | 0.40                                                  | 6.0E-02               | <i>DUOXA2</i>                           | 9.9  | 2.9E-02               | 0.09                                               | 8.0E-01               |
| <i>MT1X</i>                             | 6.2  | 1.1E-02               | 0.06                                                  | 7.9E-01               | <i>REG1B</i>                            | 8.9  | 4.6E-02               | 0.11                                               | 7.5E-01               |
| <i>CDK2AP1</i>                          | 6.1  | 3.9E-02               | -0.06                                                 | 7.7E-01               | <i>CXCL3</i>                            | 8.6  | 4.6E-04               | 0.36                                               | 2.0E-01               |
| <i>CDC26</i>                            | 6.0  | 2.6E-03               | 0.35                                                  | 9.7E-02               | <i>CXCL9</i>                            | 7.7  | 1.4E-02               | 0.02                                               | 9.7E-01               |
| <i>SLC35B2</i>                          | 5.4  | 8.1E-04               | 0.30                                                  | 1.5E-01               | <i>MMP3</i>                             | 7.0  | 3.0E-02               | -0.25                                              | 4.1E-01               |
| <i>TMEM251</i>                          | 5.2  | 9.2E-03               | 0.34                                                  | 1.1E-01               | <i>CHI3L1</i>                           | 6.9  | 1.2E-02               | 0.04                                               | 9.1E-01               |
| <i>PPP1R35</i>                          | 5.1  | 3.8E-02               | 0.16                                                  | 4.4E-01               | <i>CXCL1</i>                            | 6.6  | 2.7E-02               | 0.40                                               | 1.3E-01               |
| <i>PIMI</i>                             | 5.0  | 1.5E-02               | 0.60                                                  | 3.7E-03               | <i>TNIP3</i>                            | 6.6  | 6.5E-03               | -0.25                                              | 4.1E-01               |
| <i>PPP4C</i>                            | 4.9  | 3.8E-03               | 0.47                                                  | 2.5E-02               | <i>SAA2</i>                             | 6.3  | 1.3E-02               | 0.34                                               | 2.4E-01               |
| <i>NDUFB3</i>                           | 4.9  | 3.2E-03               | 0.41                                                  | 5.4E-02               | <i>SOCS3</i>                            | 6.2  | 8.6E-04               | -0.04                                              | 9.2E-01               |
| <i>RAB43</i>                            | 4.8  | 1.8E-02               | 0.41                                                  | 5.5E-02               | <i>SAA4</i>                             | 5.2  | 1.4E-02               | -0.07                                              | 8.6E-01               |
| <i>F13A1</i>                            | 4.7  | 1.1E-02               | 0.43                                                  | 4.2E-02               | <i>BATF</i>                             | 5.2  | 1.2E-04               | -0.02                                              | 9.6E-01               |
| <i>IFNGR1</i>                           | 4.6  | 3.5E-02               | 0.36                                                  | 9.0E-02               | <i>GOS2</i>                             | 5.1  | 2.2E-02               | -0.12                                              | 7.4E-01               |
| <i>AC068547.1</i>                       | 4.5  | 6.7E-03               | 0.26                                                  | 2.0E-01               | <i>CXCL10</i>                           | 5.0  | 4.1E-02               | -0.09                                              | 8.1E-01               |
| <i>GNB2</i>                             | 4.5  | 2.6E-02               | 0.51                                                  | 1.6E-02               | <i>IDO1</i>                             | 4.9  | 1.6E-02               | -0.05                                              | 9.0E-01               |
| <i>CLDN23</i>                           | 4.4  | 1.6E-02               | 0.31                                                  | 1.4E-01               | <i>BCL2A1</i>                           | 4.8  | 1.5E-02               | 0.31                                               | 2.9E-01               |
| <i>ZFAND3</i>                           | 4.4  | 4.3E-03               | 0.42                                                  | 4.8E-02               | <i>UBD</i>                              | 4.6  | 3.1E-03               | 0.00                                               | 9.9E-01               |
| <i>NCSTN</i>                            | 4.4  | 3.8E-03               | 0.19                                                  | 3.5E-01               | <i>C4BPB</i>                            | 4.6  | 4.6E-02               | -0.26                                              | 3.8E-01               |
| <i>PRIMPOL</i>                          | 4.3  | 3.3E-03               | 0.26                                                  | 2.1E-01               | <i>CALHM6</i>                           | 4.3  | 1.2E-03               | 0.34                                               | 2.3E-01               |
| <i>PTS</i>                              | 4.2  | 2.4E-03               | 0.22                                                  | 2.7E-01               | <i>GBP5</i>                             | 4.3  | 1.4E-03               | 0.13                                               | 7.1E-01               |
| <i>BCL2L10</i>                          | 4.2  | 4.9E-03               | 0.39                                                  | 6.8E-02               | <i>MNDA</i>                             | 4.1  | 4.8E-03               | 0.50                                               | 4.5E-02               |
| <i>CTSL</i>                             | 4.2  | 6.1E-03               | 0.38                                                  | 7.4E-02               | <i>TGM2</i>                             | 4.0  | 1.0E-02               | 0.18                                               | 5.7E-01               |
| <i>LINC00116</i>                        | 4.1  | 3.9E-03               | 0.31                                                  | 1.4E-01               | <i>IL1B</i>                             | 4.0  | 3.9E-02               | 0.14                                               | 6.8E-01               |
| <i>RPIA</i>                             | 4.1  | 4.2E-03               | 0.26                                                  | 2.0E-01               | <i>POU2AF1</i>                          | 3.9  | 5.2E-05               | 0.05                                               | 8.9E-01               |
| <i>C5orf15</i>                          | 4.1  | 4.9E-03               | 0.46                                                  | 3.2E-02               | <i>IFITM1</i>                           | 3.8  | 1.1E-02               | 0.61                                               | 9.7E-03               |
| <i>JKAMP</i>                            | 4.1  | 9.1E-03               | 0.23                                                  | 2.6E-01               | <i>CDK2AP1</i>                          | 3.8  | 2.2E-02               | -0.06                                              | 8.7E-01               |
| <i>CLEC10A</i>                          | 4.0  | 4.9E-03               | 0.60                                                  | 3.6E-03               | <i>GBP1</i>                             | 3.7  | 1.1E-02               | 0.42                                               | 1.2E-01               |
| <i>TXN</i>                              | 3.9  | 9.1E-03               | 0.19                                                  | 3.5E-01               | <i>CFI</i>                              | 3.7  | 1.6E-02               | 0.37                                               | 1.9E-01               |
| <i>MAD2L1BP</i>                         | 3.9  | 3.7E-03               | 0.48                                                  | 2.3E-02               | <i>GBP4</i>                             | 3.7  | 1.9E-03               | 0.27                                               | 3.7E-01               |
| <i>GAPT</i>                             | 3.9  | 4.7E-03               | 0.33                                                  | 1.2E-01               | <i>CFB</i>                              | 3.6  | 2.4E-02               | 0.06                                               | 8.8E-01               |
| <i>SEC61G</i>                           | 3.9  | 4.7E-03               | 0.35                                                  | 1.0E-01               | <i>FCGR1A</i>                           | 3.5  | 1.5E-02               | 0.04                                               | 9.1E-01               |
| <i>GAS6</i>                             | 3.9  | 1.9E-02               | 0.45                                                  | 3.4E-02               | <i>CXCL11</i>                           | 3.5  | 2.8E-02               | 0.02                                               | 9.7E-01               |
| <i>UNC50</i>                            | 3.8  | 8.5E-03               | 0.38                                                  | 7.7E-02               | <i>SAMD9L</i>                           | 3.4  | 1.8E-02               | -0.02                                              | 9.7E-01               |
| <i>ARL2BP</i>                           | 3.8  | 3.2E-02               | 0.37                                                  | 8.3E-02               | <i>CCLA</i>                             | 3.4  | 1.3E-02               | 0.32                                               | 2.7E-01               |
| <i>EEF1A1</i>                           | 3.8  | 4.6E-03               | 0.34                                                  | 1.0E-01               | <i>MDK</i>                              | 3.4  | 1.5E-02               | -0.19                                              | 5.4E-01               |

|                   |     |         |      |         |                 |     |         |       |         |
|-------------------|-----|---------|------|---------|-----------------|-----|---------|-------|---------|
| <i>CD9</i>        | 3.8 | 3.3E-03 | 0.38 | 7.0E-02 | <i>APOL1</i>    | 3.3 | 3.9E-02 | 0.09  | 8.0E-01 |
| <i>TRPT1</i>      | 3.8 | 3.3E-03 | 0.52 | 1.4E-02 | <i>NNMT</i>     | 3.3 | 1.2E-03 | 0.17  | 5.9E-01 |
| <i>MAP2K1</i>     | 3.8 | 8.5E-03 | 0.45 | 3.5E-02 | <i>SNX10</i>    | 3.3 | 7.6E-04 | -0.07 | 8.4E-01 |
| <i>IRF8</i>       | 3.7 | 1.9E-02 | 0.18 | 3.8E-01 | <i>C2</i>       | 3.2 | 1.2E-03 | 0.56  | 1.8E-02 |
| <i>CFAP20</i>     | 3.7 | 4.1E-03 | 0.33 | 1.1E-01 | <i>CD40</i>     | 3.2 | 8.0E-04 | 0.15  | 6.4E-01 |
| <i>FCERIA</i>     | 3.7 | 4.9E-03 | 0.27 | 1.8E-01 | <i>TRIB2</i>    | 3.1 | 2.9E-02 | -0.29 | 3.3E-01 |
| <i>CXCL1</i>      | 3.6 | 5.0E-02 | 0.40 | 6.0E-02 | <i>OAS2</i>     | 3.1 | 6.5E-04 | 0.07  | 8.4E-01 |
| <i>TRIM21</i>     | 3.6 | 1.7E-02 | 0.50 | 1.8E-02 | <i>KLF2</i>     | 3.1 | 1.3E-02 | 0.06  | 8.8E-01 |
| <i>RGCC</i>       | 3.6 | 2.7E-02 | 0.34 | 1.0E-01 | <i>LYSMD2</i>   | 3.1 | 6.4E-04 | 0.16  | 6.1E-01 |
| <i>IFNLR1</i>     | 3.6 | 6.5E-03 | 0.54 | 1.1E-02 | <i>FGR</i>      | 3.1 | 5.6E-05 | 0.05  | 9.0E-01 |
| <i>AKT1</i>       | 3.5 | 2.4E-03 | 0.31 | 1.5E-01 | <i>HLA-F</i>    | 3.1 | 1.1E-02 | 0.22  | 4.7E-01 |
| <i>SLC51B</i>     | 3.5 | 3.2E-02 | 0.49 | 2.0E-02 | <i>PLA2G16</i>  | 3.1 | 3.2E-03 | 0.29  | 3.2E-01 |
| <i>AC138894.1</i> | 3.5 | 3.5E-02 | 0.34 | 1.0E-01 | <i>MMP9</i>     | 3.0 | 1.6E-03 | 0.23  | 4.4E-01 |
| <i>PIGF</i>       | 3.5 | 1.9E-06 | 0.37 | 8.3E-02 | <i>PDPN</i>     | 3.0 | 9.4E-03 | 0.20  | 5.2E-01 |
| <i>CEBPB</i>      | 3.4 | 3.7E-03 | 0.47 | 2.5E-02 | <i>KCND3</i>    | 3.0 | 2.6E-02 | 0.45  | 8.2E-02 |
| <i>PDE6D</i>      | 3.4 | 9.2E-03 | 0.14 | 5.0E-01 | <i>RPL22L1</i>  | 3.0 | 5.8E-04 | 0.10  | 7.7E-01 |
| <i>TMEM126A</i>   | 3.4 | 2.7E-02 | 0.19 | 3.6E-01 | <i>TNFAIP2</i>  | 3.0 | 8.5E-05 | 0.22  | 4.7E-01 |
| <i>CD300A</i>     | 3.4 | 4.2E-03 | 0.40 | 5.7E-02 | <i>SOCS1</i>    | 3.0 | 9.3E-03 | 0.29  | 3.1E-01 |
| <i>KCTD14</i>     | 3.4 | 3.3E-02 | 0.27 | 1.9E-01 | <i>TRIM69</i>   | 3.0 | 1.9E-03 | 0.13  | 7.1E-01 |
| <i>MYD88</i>      | 3.4 | 3.3E-03 | 0.27 | 1.9E-01 | <i>GZMB</i>     | 3.0 | 2.5E-02 | 0.19  | 5.4E-01 |
| <i>TMEM171</i>    | 3.4 | 1.1E-02 | 0.55 | 1.1E-02 | <i>DOK3</i>     | 3.0 | 3.7E-04 | 0.31  | 3.0E-01 |
| <i>CLIC6</i>      | 3.4 | 2.6E-02 | 0.44 | 4.0E-02 | <i>IFIT3</i>    | 3.0 | 4.8E-02 | 0.12  | 7.4E-01 |
| <i>LRFN4</i>      | 3.3 | 4.3E-02 | 0.24 | 2.4E-01 | <i>DAPP1</i>    | 3.0 | 8.6E-03 | -0.04 | 9.1E-01 |
| <i>TWF2</i>       | 3.3 | 2.9E-02 | 0.26 | 2.0E-01 | <i>RAMP3</i>    | 2.9 | 2.5E-02 | -0.09 | 8.1E-01 |
| <i>PRR14</i>      | 3.2 | 2.6E-02 | 0.20 | 3.3E-01 | <i>CCL11</i>    | 2.9 | 3.1E-02 | 0.78  | 1.0E-04 |
| <i>CHPT1</i>      | 3.2 | 4.2E-03 | 0.28 | 1.7E-01 | <i>TMEM158</i>  | 2.9 | 1.6E-02 | -0.21 | 4.9E-01 |
| <i>NAXD</i>       | 3.2 | 1.3E-02 | 0.40 | 5.7E-02 | <i>PIM2</i>     | 2.9 | 1.6E-03 | -0.05 | 9.0E-01 |
| <i>MUS81</i>      | 3.2 | 8.1E-03 | 0.19 | 3.6E-01 | <i>C10orf10</i> | 2.9 | 2.4E-03 | -0.01 | 9.7E-01 |
| <i>RAB1B</i>      | 3.2 | 1.4E-02 | 0.18 | 3.7E-01 | <i>RARRES3</i>  | 2.9 | 9.3E-03 | 0.15  | 6.5E-01 |
| <i>ACKR3</i>      | 3.2 | 9.2E-03 | 0.28 | 1.8E-01 | <i>DUSP2</i>    | 2.9 | 1.7E-03 | 0.24  | 4.2E-01 |
| <i>MRPL32</i>     | 3.2 | 1.9E-02 | 0.36 | 9.1E-02 | <i>CD38</i>     | 2.8 | 5.2E-05 | 0.29  | 3.2E-01 |
| <i>PTGER2</i>     | 3.2 | 4.9E-03 | 0.64 | 2.2E-03 | <i>PTP4A3</i>   | 2.8 | 2.8E-02 | 0.28  | 3.5E-01 |
| <i>MARCKSL1</i>   | 3.2 | 1.9E-03 | 0.25 | 2.2E-01 | <i>PLEK</i>     | 2.8 | 9.4E-04 | 0.42  | 1.2E-01 |
| <i>FBXL12</i>     | 3.2 | 3.9E-03 | 0.21 | 3.0E-01 | <i>TIMP1</i>    | 2.8 | 2.2E-02 | -0.39 | 1.5E-01 |
| <i>TTYH3</i>      | 3.2 | 1.0E-02 | 0.44 | 4.0E-02 | <i>REC8</i>     | 2.8 | 3.9E-03 | -0.12 | 7.3E-01 |
| <i>BMF</i>        | 3.2 | 1.2E-04 | 0.65 | 1.5E-03 | <i>STAT1</i>    | 2.8 | 6.2E-03 | 0.06  | 8.8E-01 |
| <i>MMP12</i>      | 3.2 | 2.4E-02 | 0.44 | 3.7E-02 | <i>CD53</i>     | 2.8 | 8.9E-03 | 0.27  | 3.6E-01 |
| <i>CYSTM1</i>     | 3.2 | 9.9E-05 | 0.54 | 1.1E-02 | <i>IFNGR1</i>   | 2.8 | 3.3E-02 | 0.36  | 2.0E-01 |
| <i>NCF2</i>       | 3.1 | 1.2E-02 | 0.44 | 4.1E-02 | <i>NMB</i>      | 2.7 | 4.3E-02 | -0.11 | 7.4E-01 |
| <i>TMSB4X</i>     | 3.1 | 2.7E-02 | 0.33 | 1.1E-01 | <i>IFIT2</i>    | 2.7 | 5.5E-03 | 0.13  | 7.1E-01 |
| <i>LY96</i>       | 3.1 | 9.4E-03 | 0.18 | 3.7E-01 | <i>ARFGAP3</i>  | 2.7 | 1.8E-03 | -0.23 | 4.5E-01 |
| <i>CD53</i>       | 3.1 | 9.5E-03 | 0.27 | 1.8E-01 | <i>CIITA</i>    | 2.7 | 6.0E-04 | 0.15  | 6.6E-01 |
| <i>C16orf91</i>   | 3.1 | 2.9E-02 | 0.31 | 1.4E-01 | <i>PARP9</i>    | 2.7 | 1.1E-03 | 0.36  | 2.1E-01 |
| <i>KTI12</i>      | 3.1 | 9.1E-03 | 0.35 | 9.7E-02 | <i>PIK3AP1</i>  | 2.7 | 2.0E-03 | 0.16  | 6.2E-01 |

|                 |     |         |      |         |                  |     |         |       |         |
|-----------------|-----|---------|------|---------|------------------|-----|---------|-------|---------|
| <i>NOP10</i>    | 3.1 | 3.1E-04 | 0.37 | 8.2E-02 | <i>SMOC2</i>     | 2.7 | 1.8E-02 | 0.22  | 4.7E-01 |
| <i>PNP</i>      | 3.1 | 1.0E-02 | 0.35 | 1.0E-01 | <i>BACE2</i>     | 2.7 | 6.5E-03 | 0.08  | 8.3E-01 |
| <i>MGST1</i>    | 3.1 | 3.8E-03 | 0.48 | 2.4E-02 | <i>SEC14L1</i>   | 2.6 | 3.2E-04 | 0.39  | 1.4E-01 |
| <i>NRAS</i>     | 3.1 | 8.4E-04 | 0.45 | 3.4E-02 | <i>TRIM21</i>    | 2.6 | 7.6E-03 | 0.50  | 4.1E-02 |
| <i>DERA</i>     | 3.0 | 1.2E-02 | 0.44 | 4.0E-02 | <i>PLAUR</i>     | 2.6 | 5.2E-03 | 0.14  | 6.7E-01 |
| <i>SEC14L1</i>  | 3.0 | 4.2E-03 | 0.39 | 6.5E-02 | <i>PNOC</i>      | 2.6 | 2.4E-02 | 0.21  | 4.9E-01 |
| <i>CEBPE</i>    | 3.0 | 2.7E-02 | 0.53 | 1.3E-02 | <i>FCRL5</i>     | 2.6 | 1.4E-02 | 0.05  | 8.9E-01 |
| <i>CREG1</i>    | 3.0 | 1.4E-02 | 0.33 | 1.2E-01 | <i>HLA-DMA</i>   | 2.6 | 6.8E-03 | 0.20  | 5.2E-01 |
| <i>DTD1</i>     | 3.0 | 1.0E-02 | 0.25 | 2.2E-01 | <i>CASP1</i>     | 2.6 | 9.4E-03 | 0.54  | 2.5E-02 |
| <i>MNDA</i>     | 3.0 | 2.5E-02 | 0.50 | 2.0E-02 | <i>ARHGAP25</i>  | 2.5 | 4.6E-03 | -0.27 | 3.7E-01 |
| <i>ZNRF2</i>    | 3.0 | 3.7E-02 | 0.46 | 3.3E-02 | <i>RASGRP1</i>   | 2.5 | 3.4E-02 | 0.30  | 3.0E-01 |
| <i>SDHB</i>     | 3.0 | 4.2E-03 | 0.35 | 9.3E-02 | <i>LST1</i>      | 2.5 | 6.3E-04 | 0.52  | 3.3E-02 |
| <i>ITGAE</i>    | 3.0 | 5.4E-03 | 0.26 | 2.1E-01 | <i>LAX1</i>      | 2.5 | 4.2E-02 | 0.04  | 9.2E-01 |
| <i>C1orf174</i> | 2.9 | 1.2E-02 | 0.34 | 1.0E-01 | <i>LINC00116</i> | 2.5 | 4.1E-03 | 0.31  | 2.9E-01 |
| <i>P2RY14</i>   | 2.9 | 9.4E-03 | 0.63 | 2.3E-03 | <i>BIRC3</i>     | 2.5 | 4.3E-03 | 0.01  | 9.7E-01 |
| <i>MGST3</i>    | 2.9 | 2.5E-03 | 0.41 | 5.5E-02 | <i>CARD6</i>     | 2.5 | 3.2E-02 | -0.01 | 9.7E-01 |
| <i>ELK1</i>     | 2.9 | 1.0E-02 | 0.22 | 2.7E-01 | <i>WARS</i>      | 2.5 | 7.7E-03 | -0.05 | 8.9E-01 |
| <i>CLDND1</i>   | 2.9 | 1.1E-02 | 0.44 | 3.9E-02 | <i>TTYH3</i>     | 2.5 | 4.5E-02 | 0.44  | 9.1E-02 |
| <i>SLC35A5</i>  | 2.9 | 7.4E-03 | 0.13 | 5.3E-01 | <i>ARID5A</i>    | 2.5 | 3.8E-03 | -0.10 | 7.8E-01 |
| <i>TMEM150A</i> | 2.9 | 3.3E-03 | 0.30 | 1.6E-01 | <i>SRGN</i>      | 2.5 | 3.5E-03 | 0.31  | 2.8E-01 |
| <i>CHCHD3</i>   | 2.8 | 4.8E-03 | 0.16 | 4.2E-01 | <i>MAP3K8</i>    | 2.5 | 1.9E-03 | -0.32 | 2.8E-01 |
| <i>HLA-DMA</i>  | 2.8 | 1.6E-02 | 0.20 | 3.3E-01 | <i>ST8SIA4</i>   | 2.4 | 6.9E-05 | 0.33  | 2.6E-01 |
| <i>RNF146</i>   | 2.8 | 1.0E-02 | 0.25 | 2.1E-01 | <i>C5orf15</i>   | 2.4 | 4.1E-03 | 0.46  | 6.9E-02 |
| <i>CSTB</i>     | 2.8 | 1.6E-03 | 0.63 | 2.3E-03 | <i>SERPINB9</i>  | 2.4 | 2.0E-02 | 0.07  | 8.4E-01 |
| <i>HDHD5</i>    | 2.8 | 2.7E-02 | 0.27 | 1.9E-01 | <i>ACSL4</i>     | 2.4 | 5.3E-03 | 0.27  | 3.6E-01 |
| <i>BCL7B</i>    | 2.8 | 1.2E-02 | 0.32 | 1.3E-01 | <i>CLEC2B</i>    | 2.4 | 1.3E-02 | -0.05 | 8.9E-01 |
| <i>TDRD7</i>    | 2.8 | 8.5E-03 | 0.48 | 2.5E-02 | <i>CSF2RB</i>    | 2.4 | 1.8E-04 | 0.28  | 3.4E-01 |
| <i>CXCL3</i>    | 2.8 | 4.6E-02 | 0.36 | 8.7E-02 | <i>RASSF5</i>    | 2.4 | 8.3E-03 | 0.34  | 2.4E-01 |
| <i>HS6ST1</i>   | 2.8 | 2.2E-02 | 0.30 | 1.6E-01 | <i>IRF4</i>      | 2.4 | 1.1E-02 | -0.04 | 9.1E-01 |
| <i>MIPEP</i>    | 2.8 | 2.1E-02 | 0.33 | 1.2E-01 | <i>LYN</i>       | 2.4 | 3.4E-03 | 0.26  | 3.8E-01 |
| <i>LPCAT3</i>   | 2.8 | 4.7E-02 | 0.38 | 6.9E-02 | <i>MGP</i>       | 2.4 | 3.6E-02 | -0.26 | 3.8E-01 |
| <i>PNRC1</i>    | 2.8 | 1.8E-02 | 0.45 | 3.7E-02 | <i>TRIM59</i>    | 2.4 | 6.0E-04 | 0.09  | 8.0E-01 |
| <i>SMOC2</i>    | 2.8 | 4.8E-02 | 0.22 | 2.8E-01 | <i>JAK2</i>      | 2.4 | 3.1E-03 | -0.13 | 7.1E-01 |
| <i>NT5C3B</i>   | 2.7 | 3.4E-02 | 0.51 | 1.6E-02 | <i>TAP2</i>      | 2.4 | 3.7E-03 | 0.12  | 7.4E-01 |
| <i>CD4</i>      | 2.7 | 1.2E-02 | 0.35 | 1.0E-01 | <i>HLA-DOB</i>   | 2.4 | 4.4E-02 | -0.08 | 8.3E-01 |
| <i>COMMD6</i>   | 2.7 | 2.0E-02 | 0.24 | 2.4E-01 | <i>PRDM1</i>     | 2.4 | 2.3E-02 | 0.40  | 1.3E-01 |
| <i>WRNIP1</i>   | 2.7 | 3.2E-02 | 0.31 | 1.4E-01 | <i>PHLDA1</i>    | 2.4 | 3.2E-02 | -0.19 | 5.3E-01 |
| <i>ALKBH5</i>   | 2.7 | 8.5E-03 | 0.34 | 1.1E-01 | <i>HLA-B</i>     | 2.4 | 2.9E-03 | 0.35  | 2.1E-01 |
| <i>SMIM26</i>   | 2.7 | 1.7E-02 | 0.10 | 6.2E-01 | <i>LCPI</i>      | 2.4 | 2.9E-04 | 0.29  | 3.2E-01 |
| <i>CCL4L2</i>   | 2.7 | 2.2E-02 | 0.35 | 9.8E-02 | <i>SCPEP1</i>    | 2.3 | 6.1E-03 | 0.40  | 1.4E-01 |
| <i>TPBG</i>     | 2.7 | 6.4E-04 | 0.45 | 3.5E-02 | <i>KLHL6</i>     | 2.3 | 6.6E-03 | 0.16  | 6.2E-01 |
| <i>SERPINF1</i> | 2.7 | 4.3E-02 | 0.37 | 8.2E-02 | <i>CLEC4E</i>    | 2.3 | 2.3E-03 | 0.14  | 6.9E-01 |
| <i>FOXF2</i>    | 2.7 | 1.5E-02 | 0.22 | 2.8E-01 | <i>LRFN4</i>     | 2.3 | 1.1E-02 | 0.24  | 4.2E-01 |
| <i>TMEM230</i>  | 2.7 | 3.7E-03 | 0.35 | 1.0E-01 | <i>ANXA3</i>     | 2.3 | 1.9E-02 | -0.21 | 5.0E-01 |



|                 |     |         |      |         |                 |     |         |       |         |
|-----------------|-----|---------|------|---------|-----------------|-----|---------|-------|---------|
| <i>PLD3</i>     | 2.7 | 3.3E-03 | 0.37 | 8.3E-02 | <i>RAB8B</i>    | 2.3 | 1.8E-03 | 0.37  | 1.9E-01 |
| <i>FOXA1</i>    | 2.7 | 2.7E-02 | 0.51 | 1.7E-02 | <i>LY6E</i>     | 2.3 | 4.2E-02 | -0.32 | 2.8E-01 |
| <i>SF3B4</i>    | 2.7 | 2.5E-02 | 0.27 | 1.8E-01 | <i>TSPAN5</i>   | 2.3 | 2.2E-02 | -0.10 | 7.7E-01 |
| <i>TIPARP</i>   | 2.7 | 1.6E-02 | 0.67 | 1.1E-03 | <i>CYTIP</i>    | 2.3 | 1.5E-02 | -0.09 | 8.1E-01 |
| <i>HLA-DQB2</i> | 2.7 | 8.5E-03 | 0.30 | 1.5E-01 | <i>NDUFB3</i>   | 2.3 | 2.9E-03 | 0.41  | 1.2E-01 |
| <i>RNF128</i>   | 2.7 | 3.1E-02 | 0.55 | 1.1E-02 | <i>APOBEC3D</i> | 2.3 | 3.7E-02 | -0.31 | 2.9E-01 |
| <i>CTDSP2</i>   | 2.6 | 4.9E-03 | 0.35 | 1.0E-01 | <i>CLEC4A</i>   | 2.3 | 4.1E-02 | -0.25 | 4.1E-01 |
| <i>MED20</i>    | 2.6 | 1.8E-02 | 0.40 | 6.2E-02 | <i>UBE2L6</i>   | 2.3 | 6.9E-03 | 0.61  | 9.7E-03 |
| <i>CEBPD</i>    | 2.6 | 1.3E-02 | 0.56 | 8.6E-03 | <i>SLC35B2</i>  | 2.3 | 1.9E-02 | 0.30  | 3.0E-01 |
| <i>GCH1</i>     | 2.6 | 8.1E-03 | 0.43 | 4.2E-02 | <i>PNO1</i>     | 2.3 | 1.1E-03 | 0.01  | 9.8E-01 |
| <i>ZNF706</i>   | 2.6 | 4.2E-03 | 0.14 | 5.0E-01 | <i>ITGAX</i>    | 2.3 | 1.0E-02 | 0.30  | 3.0E-01 |
| <i>NDUFC1</i>   | 2.6 | 1.2E-02 | 0.09 | 6.7E-01 | <i>NLRC5</i>    | 2.3 | 4.0E-03 | -0.48 | 5.6E-02 |
| <i>YAPI</i>     | 2.6 | 4.0E-03 | 0.56 | 9.5E-03 | <i>KLHL5</i>    | 2.3 | 5.7E-03 | 0.20  | 5.2E-01 |
| <i>ITM2C</i>    | 2.6 | 3.1E-02 | 0.11 | 5.9E-01 | <i>MZB1</i>     | 2.3 | 1.8E-02 | 0.20  | 5.2E-01 |
| <i>BRPF3</i>    | 2.6 | 1.6E-02 | 0.07 | 7.3E-01 | <i>PDP1</i>     | 2.2 | 3.1E-03 | -0.14 | 6.7E-01 |
| <i>ACVR1B</i>   | 2.6 | 1.9E-02 | 0.36 | 8.7E-02 | <i>LILRB3</i>   | 2.2 | 4.9E-02 | 0.19  | 5.4E-01 |
| <i>OST4</i>     | 2.6 | 4.1E-03 | 0.20 | 3.2E-01 | <i>COL1A2</i>   | 2.2 | 3.7E-02 | 0.64  | 6.2E-03 |
| <i>SDHAF3</i>   | 2.6 | 1.1E-02 | 0.05 | 8.3E-01 | <i>FAM129A</i>  | 2.2 | 7.6E-03 | 0.13  | 6.9E-01 |
| <i>ZNF513</i>   | 2.6 | 1.1E-02 | 0.35 | 9.7E-02 | <i>IRF8</i>     | 2.2 | 4.7E-02 | 0.18  | 5.7E-01 |
| <i>RPL30</i>    | 2.6 | 3.9E-03 | 0.29 | 1.6E-01 | <i>GPX2</i>     | 2.2 | 8.3E-03 | -0.43 | 9.7E-02 |
| <i>DNAJB9</i>   | 2.6 | 3.1E-02 | 0.33 | 1.2E-01 | <i>CCLAL2</i>   | 2.2 | 2.0E-02 | 0.35  | 2.2E-01 |
| <i>TCEAL7</i>   | 2.6 | 2.6E-02 | 0.40 | 6.0E-02 | <i>CYSLTR1</i>  | 2.2 | 2.8E-02 | 0.29  | 3.2E-01 |
| <i>FAM214B</i>  | 2.6 | 4.1E-02 | 0.55 | 1.1E-02 | <i>ITGB2</i>    | 2.2 | 1.9E-03 | 0.10  | 7.8E-01 |
| <i>CDK8</i>     | 2.6 | 4.4E-02 | 0.48 | 2.3E-02 | <i>SKAP1</i>    | 2.2 | 3.2E-02 | 0.08  | 8.3E-01 |
| <i>CYP2C9</i>   | 2.6 | 2.0E-02 | 0.66 | 1.4E-03 | <i>PPP1R18</i>  | 2.2 | 3.8E-02 | 0.26  | 3.8E-01 |
| <i>WDR6</i>     | 2.6 | 1.8E-02 | 0.34 | 1.1E-01 | <i>CTSK</i>     | 2.2 | 3.5E-02 | 0.19  | 5.2E-01 |
| <i>LHFPL6</i>   | 2.6 | 3.1E-02 | 0.25 | 2.3E-01 | <i>PFKFB3</i>   | 2.2 | 4.2E-02 | -0.20 | 5.2E-01 |
| <i>CTGF</i>     | 2.5 | 6.8E-03 | 0.34 | 1.1E-01 | <i>PLEKH01</i>  | 2.2 | 1.1E-03 | 0.10  | 7.9E-01 |
| <i>EIF2D</i>    | 2.5 | 1.3E-02 | 0.35 | 9.8E-02 | <i>SLAMF7</i>   | 2.2 | 1.8E-02 | 0.44  | 9.4E-02 |
| <i>EIF1AD</i>   | 2.5 | 1.2E-03 | 0.48 | 2.5E-02 | <i>IFI27L2</i>  | 2.2 | 2.4E-02 | -0.26 | 3.8E-01 |
| <i>DCTN6</i>    | 2.5 | 1.8E-02 | 0.15 | 4.6E-01 | <i>TMEM126A</i> | 2.2 | 4.1E-03 | 0.19  | 5.4E-01 |
| <i>KLF4</i>     | 2.5 | 2.9E-02 | 0.55 | 9.8E-03 | <i>CD300A</i>   | 2.2 | 3.6E-03 | 0.40  | 1.3E-01 |
| <i>MRPL34</i>   | 2.5 | 3.0E-03 | 0.35 | 9.6E-02 | <i>MCUB</i>     | 2.2 | 1.4E-03 | 0.06  | 8.8E-01 |
| <i>MFSD1</i>    | 2.5 | 5.7E-03 | 0.35 | 9.9E-02 | <i>LPGAT1</i>   | 2.2 | 1.9E-02 | 0.49  | 4.6E-02 |
| <i>GLRX</i>     | 2.5 | 2.1E-02 | 0.54 | 1.1E-02 | <i>PTPRC</i>    | 2.2 | 2.8E-02 | 0.03  | 9.4E-01 |
| <i>ACAT1</i>    | 2.5 | 3.1E-02 | 0.44 | 3.8E-02 | <i>LYZ</i>      | 2.2 | 1.4E-02 | -0.11 | 7.4E-01 |
| <i>DDHD2</i>    | 2.5 | 3.3E-03 | 0.29 | 1.6E-01 | <i>SLFN5</i>    | 2.2 | 3.7E-02 | 0.12  | 7.4E-01 |
| <i>ELOC</i>     | 2.5 | 1.4E-02 | 0.28 | 1.8E-01 | <i>SCRNI</i>    | 2.2 | 1.2E-02 | 0.08  | 8.2E-01 |
| <i>B4GALT4</i>  | 2.5 | 1.7E-02 | 0.19 | 3.5E-01 | <i>MSN</i>      | 2.2 | 3.5E-04 | 0.13  | 7.1E-01 |
| <i>TMEM14C</i>  | 2.5 | 1.4E-02 | 0.37 | 7.9E-02 | <i>SERPING1</i> | 2.2 | 2.2E-02 | -0.21 | 5.0E-01 |
| <i>SH3BP4</i>   | 2.5 | 4.9E-03 | 0.08 | 7.2E-01 | <i>SAMSNI</i>   | 2.2 | 1.8E-02 | 0.29  | 3.3E-01 |
| <i>EMC7</i>     | 2.5 | 2.5E-02 | 0.10 | 6.4E-01 | <i>DNAJB9</i>   | 2.2 | 2.0E-02 | 0.33  | 2.6E-01 |
| <i>TAF5L</i>    | 2.5 | 7.6E-03 | 0.14 | 5.0E-01 | <i>CD274</i>    | 2.2 | 1.8E-02 | 0.03  | 9.5E-01 |
| <i>C2orf76</i>  | 2.5 | 5.7E-03 | 0.42 | 5.0E-02 | <i>PLEKHA4</i>  | 2.2 | 4.7E-02 | -0.16 | 6.2E-01 |

|                |     |         |      |         |                |     |         |       |         |
|----------------|-----|---------|------|---------|----------------|-----|---------|-------|---------|
| <i>TMEM35B</i> | 2.5 | 1.5E-02 | 0.43 | 4.2E-02 | <i>HLA-DRA</i> | 2.1 | 3.0E-03 | 0.33  | 2.4E-01 |
| <i>PHLPP2</i>  | 2.5 | 1.8E-02 | 0.68 | 1.0E-03 | <i>PCDH7</i>   | 2.1 | 4.7E-02 | 0.34  | 2.3E-01 |
| <i>RPL22L1</i> | 2.5 | 1.4E-02 | 0.10 | 6.1E-01 | <i>TMEM251</i> | 2.1 | 1.8E-02 | 0.34  | 2.4E-01 |
| <i>ABCB10</i>  | 2.5 | 3.7E-03 | 0.47 | 2.6E-02 | <i>IGFBP7</i>  | 2.1 | 3.4E-02 | 0.42  | 1.2E-01 |
| <i>HOXB2</i>   | 2.5 | 4.4E-02 | 0.41 | 5.2E-02 | <i>DRAM1</i>   | 2.1 | 3.2E-02 | 0.23  | 4.6E-01 |
| <i>GLIPR1</i>  | 2.5 | 4.0E-02 | 0.18 | 3.7E-01 | <i>JKAMP</i>   | 2.1 | 5.5E-03 | 0.23  | 4.5E-01 |
| <i>HLA-F</i>   | 2.5 | 1.7E-02 | 0.22 | 2.7E-01 | <i>TEAD3</i>   | 2.1 | 1.9E-03 | 0.03  | 9.5E-01 |
| <i>IGIP</i>    | 2.5 | 1.3E-02 | 0.25 | 2.1E-01 | <i>EVI2B</i>   | 2.1 | 6.5E-03 | 0.18  | 5.6E-01 |
| <i>GRAMD4</i>  | 2.5 | 1.9E-02 | 0.58 | 5.6E-03 | <i>SLA</i>     | 2.1 | 4.7E-02 | 0.31  | 2.9E-01 |
| <i>RAP2A</i>   | 2.5 | 4.5E-02 | 0.11 | 5.9E-01 | <i>CHST11</i>  | 2.1 | 3.6E-03 | 0.26  | 3.9E-01 |
| <i>RPS25</i>   | 2.5 | 3.7E-03 | 0.24 | 2.3E-01 | <i>GIMAP5</i>  | 2.1 | 3.6E-02 | -0.02 | 9.6E-01 |
| <i>SPHK2</i>   | 2.5 | 4.3E-02 | 0.56 | 8.7E-03 | <i>BCL6</i>    | 2.1 | 2.7E-02 | -0.02 | 9.7E-01 |
| <i>LIPA</i>    | 2.4 | 5.0E-03 | 0.45 | 3.7E-02 | <i>LPIN1</i>   | 2.1 | 2.3E-03 | -0.19 | 5.4E-01 |
| <i>RNF5</i>    | 2.4 | 3.8E-03 | 0.47 | 2.6E-02 | <i>GIMAP1</i>  | 2.1 | 1.1E-02 | 0.12  | 7.3E-01 |
| <i>PHC2</i>    | 2.4 | 1.3E-02 | 0.37 | 8.3E-02 | <i>PDE6D</i>   | 2.1 | 1.9E-02 | 0.14  | 6.7E-01 |
| <i>SDHC</i>    | 2.4 | 3.7E-03 | 0.34 | 1.1E-01 | <i>CLEC7A</i>  | 2.1 | 9.6E-03 | 0.13  | 7.1E-01 |
| <i>PCDH18</i>  | 2.4 | 1.8E-02 | 0.49 | 2.2E-02 | <i>TRIM22</i>  | 2.1 | 2.3E-02 | 0.26  | 3.9E-01 |
| <i>SEC61B</i>  | 2.4 | 3.5E-02 | 0.30 | 1.5E-01 | <i>ASPHD2</i>  | 2.1 | 1.6E-02 | 0.15  | 6.6E-01 |
| <i>LYSMD3</i>  | 2.4 | 1.8E-03 | 0.43 | 4.5E-02 | <i>FBXO5</i>   | 2.1 | 3.9E-02 | -0.14 | 6.6E-01 |
| <i>TMEM242</i> | 2.4 | 3.8E-03 | 0.24 | 2.4E-01 | <i>RIOX2</i>   | 2.1 | 8.3E-04 | 0.20  | 5.2E-01 |
| <i>LGMN</i>    | 2.4 | 1.7E-02 | 0.53 | 1.2E-02 | <i>CD82</i>    | 2.1 | 2.9E-02 | 0.12  | 7.3E-01 |
| <i>CKLF</i>    | 2.4 | 2.4E-02 | 0.40 | 5.7E-02 | <i>PSMB9</i>   | 2.1 | 1.8E-02 | 0.31  | 2.9E-01 |
| <i>LSM6</i>    | 2.4 | 3.0E-02 | 0.41 | 5.4E-02 | <i>TAP1</i>    | 2.1 | 1.4E-02 | 0.15  | 6.6E-01 |
| <i>MAGEF1</i>  | 2.4 | 6.3E-03 | 0.01 | 9.5E-01 | <i>LAP3</i>    | 2.1 | 5.2E-03 | 0.35  | 2.2E-01 |
| <i>PRIM2</i>   | 2.4 | 1.3E-02 | 0.20 | 3.3E-01 | <i>CEBPB</i>   | 2.1 | 2.3E-02 | 0.47  | 5.7E-02 |
| <i>ZNF319</i>  | 2.4 | 4.3E-02 | 0.18 | 3.7E-01 | <i>PLCG2</i>   | 2.1 | 1.7E-02 | 0.13  | 7.1E-01 |
| <i>TMTC2</i>   | 2.4 | 1.1E-02 | 0.28 | 1.7E-01 | <i>ISG20</i>   | 2.1 | 3.7E-02 | 0.17  | 5.8E-01 |
| <i>SF3B6</i>   | 2.4 | 9.1E-03 | 0.45 | 3.7E-02 | <i>RNF24</i>   | 2.1 | 3.4E-04 | 0.63  | 7.2E-03 |
| <i>TCF21</i>   | 2.4 | 2.8E-02 | 0.52 | 1.5E-02 | <i>SIRPA</i>   | 2.1 | 7.6E-03 | 0.43  | 9.7E-02 |
| <i>KLRB1</i>   | 2.4 | 4.0E-02 | 0.20 | 3.4E-01 | <i>ANGPT2</i>  | 2.1 | 8.2E-03 | -0.20 | 5.1E-01 |
| <i>TFB2M</i>   | 2.4 | 1.2E-02 | 0.45 | 3.4E-02 | <i>TCEAL3</i>  | 2.1 | 2.8E-02 | -0.06 | 8.8E-01 |
| <i>WRAP73</i>  | 2.4 | 1.0E-02 | 0.32 | 1.3E-01 | <i>IFI16</i>   | 2.0 | 3.9E-03 | -0.07 | 8.5E-01 |
| <i>GATM</i>    | 2.4 | 2.2E-02 | 0.38 | 7.4E-02 | <i>FAM117A</i> | 2.0 | 1.4E-02 | 0.04  | 9.1E-01 |
| <i>HSPA1A</i>  | 2.4 | 4.9E-02 | 0.62 | 2.5E-03 | <i>XBPI</i>    | 2.0 | 2.9E-02 | -0.01 | 9.7E-01 |
| <i>YRDC</i>    | 2.4 | 2.4E-02 | 0.16 | 4.3E-01 | <i>CCDC71L</i> | 2.0 | 7.6E-03 | 0.31  | 3.0E-01 |
| <i>IGFBP7</i>  | 2.4 | 4.3E-02 | 0.42 | 5.1E-02 | <i>IFITM3</i>  | 2.0 | 7.8E-03 | 0.25  | 4.0E-01 |
| <i>ZC3H7B</i>  | 2.4 | 4.7E-02 | 0.26 | 2.0E-01 | <i>CDC26</i>   | 2.0 | 1.6E-02 | 0.35  | 2.2E-01 |
| <i>CYBRD1</i>  | 2.4 | 9.1E-03 | 0.45 | 3.4E-02 | <i>VAMP5</i>   | 2.0 | 1.9E-02 | 0.23  | 4.4E-01 |
| <i>SGSH</i>    | 2.4 | 3.7E-03 | 0.32 | 1.3E-01 | <i>PMEPA1</i>  | 2.0 | 2.0E-02 | 0.11  | 7.6E-01 |
| <i>MAPK7</i>   | 2.3 | 9.9E-05 | 0.37 | 8.1E-02 | <i>PTAFR</i>   | 2.0 | 1.1E-02 | 0.49  | 4.9E-02 |
| <i>MYC</i>     | 2.3 | 3.0E-02 | 0.34 | 1.1E-01 | <i>SOD2</i>    | 2.0 | 9.6E-04 | 0.35  | 2.2E-01 |
| <i>HIKESHI</i> | 2.3 | 2.8E-02 | 0.25 | 2.2E-01 | <i>STX2</i>    | 2.0 | 1.3E-02 | 0.12  | 7.1E-01 |
| <i>SRP9</i>    | 2.3 | 4.2E-02 | 0.34 | 1.1E-01 | <i>PTS</i>     | 2.0 | 7.6E-03 | 0.22  | 4.6E-01 |
| <i>OXER1</i>   | 2.3 | 2.7E-02 | 0.17 | 4.0E-01 | <i>MRPL32</i>  | 2.0 | 1.3E-02 | 0.36  | 2.1E-01 |

|                 |     |         |      |         |                |     |         |       |         |
|-----------------|-----|---------|------|---------|----------------|-----|---------|-------|---------|
| <i>B3GALT1</i>  | 2.3 | 4.0E-02 | 0.03 | 8.7E-01 | <i>IL3RA</i>   | 2.0 | 3.2E-02 | -0.24 | 4.2E-01 |
| <i>TBC1D22B</i> | 2.3 | 2.3E-02 | 0.15 | 4.6E-01 | <i>BASPI</i>   | 2.0 | 3.1E-02 | 0.32  | 2.7E-01 |
| <i>SLBP</i>     | 2.3 | 1.8E-02 | 0.33 | 1.1E-01 | <i>TBXAS1</i>  | 2.0 | 4.7E-02 | 0.21  | 4.9E-01 |
| <i>LUM</i>      | 2.3 | 1.0E-02 | 0.49 | 2.2E-02 | <i>IRF9</i>    | 2.0 | 3.5E-02 | 0.22  | 4.7E-01 |
| <i>OGT</i>      | 2.3 | 1.9E-02 | 0.36 | 9.1E-02 | <i>VCAMI</i>   | 2.0 | 3.2E-02 | 0.30  | 3.0E-01 |
| <i>POLR2K</i>   | 2.3 | 1.9E-02 | 0.02 | 9.4E-01 | <i>CTSL</i>    | 2.0 | 4.4E-02 | 0.38  | 1.7E-01 |
| <i>B2M</i>      | 2.3 | 1.0E-02 | 0.34 | 1.1E-01 | <i>CASP8</i>   | 2.0 | 2.8E-02 | -0.05 | 9.0E-01 |
| <i>DUSP2</i>    | 2.3 | 8.5E-03 | 0.24 | 2.4E-01 | <i>MAP2K1</i>  | 2.0 | 2.5E-02 | 0.45  | 8.0E-02 |
| <i>CPSF7</i>    | 2.3 | 5.7E-03 | 0.41 | 5.2E-02 | <i>PECAM1</i>  | 2.0 | 2.7E-02 | -0.21 | 5.0E-01 |
| <i>NBPF11</i>   | 2.3 | 1.9E-02 | 0.17 | 3.9E-01 | <i>DCK</i>     | 2.0 | 1.3E-02 | -0.34 | 2.3E-01 |
| <i>RHPN2</i>    | 2.3 | 3.5E-02 | 0.25 | 2.2E-01 | <i>MUS81</i>   | 2.0 | 7.7E-03 | 0.19  | 5.4E-01 |
| <i>SPINT2</i>   | 2.3 | 4.7E-03 | 0.22 | 2.8E-01 | <i>CD74</i>    | 2.0 | 8.3E-03 | 0.11  | 7.4E-01 |
| <i>TM9SF2</i>   | 2.3 | 6.2E-03 | 0.42 | 4.7E-02 | <i>IRF1</i>    | 1.9 | 3.8E-02 | 0.26  | 3.8E-01 |
| <i>HLA-B</i>    | 2.3 | 6.8E-03 | 0.35 | 9.3E-02 | <i>HLA-DMB</i> | 1.9 | 6.2E-03 | 0.25  | 4.0E-01 |
| <i>SNX27</i>    | 2.3 | 7.6E-03 | 0.44 | 3.7E-02 | <i>DPYD</i>    | 1.9 | 3.0E-02 | 0.23  | 4.6E-01 |
| <i>PFN2</i>     | 2.3 | 1.5E-02 | 0.54 | 1.1E-02 | <i>IFITM2</i>  | 1.9 | 7.4E-03 | 0.12  | 7.3E-01 |
| <i>COL4A1</i>   | 2.3 | 3.1E-02 | 0.53 | 1.2E-02 | <i>ASRGL1</i>  | 1.9 | 3.1E-02 | -0.60 | 9.9E-03 |
| <i>PPP1R14B</i> | 2.3 | 8.5E-03 | 0.48 | 2.5E-02 | <i>CHST15</i>  | 1.9 | 1.2E-02 | 0.37  | 1.8E-01 |
| <i>SLC16A5</i>  | 2.3 | 4.3E-02 | 0.59 | 4.7E-03 | <i>ARHGDI3</i> | 1.9 | 4.6E-02 | 0.01  | 9.8E-01 |
| <i>IL15RA</i>   | 2.3 | 1.8E-02 | 0.55 | 9.7E-03 | <i>RAB31</i>   | 1.9 | 1.2E-02 | 0.17  | 5.8E-01 |
| <i>RGP1</i>     | 2.3 | 3.1E-02 | 0.48 | 2.5E-02 | <i>ZYX</i>     | 1.9 | 4.4E-02 | 0.30  | 3.0E-01 |
| <i>DYNLT1</i>   | 2.3 | 2.4E-03 | 0.32 | 1.2E-01 | <i>BLVRA</i>   | 1.9 | 3.4E-02 | 0.05  | 9.0E-01 |
| <i>C19orf38</i> | 2.3 | 1.6E-02 | 0.25 | 2.2E-01 | <i>USP18</i>   | 1.9 | 3.7E-02 | 0.02  | 9.7E-01 |
| <i>SRSF2</i>    | 2.3 | 1.9E-02 | 0.07 | 7.5E-01 | <i>TAF5L</i>   | 1.9 | 8.3E-04 | 0.14  | 6.8E-01 |
| <i>RB1</i>      | 2.3 | 4.9E-03 | 0.25 | 2.2E-01 | <i>TMEM165</i> | 1.9 | 2.6E-03 | 0.20  | 5.2E-01 |
| <i>SIAH2</i>    | 2.3 | 1.4E-02 | 0.27 | 1.9E-01 | <i>ADGRE2</i>  | 1.9 | 2.1E-02 | 0.36  | 1.9E-01 |
| <i>PCNP</i>     | 2.3 | 6.3E-03 | 0.23 | 2.5E-01 | <i>TXN</i>     | 1.9 | 2.8E-02 | 0.19  | 5.4E-01 |
| <i>NUP37</i>    | 2.3 | 2.8E-02 | 0.42 | 4.8E-02 | <i>B2M</i>     | 1.9 | 1.4E-02 | 0.34  | 2.4E-01 |
| <i>PIK3AP1</i>  | 2.3 | 2.7E-02 | 0.16 | 4.3E-01 | <i>PARP14</i>  | 1.9 | 1.6E-02 | 0.07  | 8.4E-01 |
| <i>CSF2RB</i>   | 2.3 | 2.6E-02 | 0.28 | 1.7E-01 | <i>ST6GAL1</i> | 1.9 | 2.0E-02 | -0.05 | 8.9E-01 |
| <i>REPIN1</i>   | 2.2 | 3.7E-03 | 0.28 | 1.8E-01 | <i>IFI30</i>   | 1.9 | 1.6E-02 | -0.07 | 8.4E-01 |
| <i>OCRL</i>     | 2.2 | 3.7E-03 | 0.43 | 4.2E-02 | <i>MTHFD2</i>  | 1.9 | 2.5E-04 | -0.16 | 6.2E-01 |
| <i>RPS15A</i>   | 2.2 | 3.4E-03 | 0.12 | 5.5E-01 | <i>HERPUD1</i> | 1.9 | 1.1E-02 | 0.23  | 4.5E-01 |
| <i>NECTIN1</i>  | 2.2 | 3.9E-03 | 0.21 | 3.0E-01 | <i>SGMS1</i>   | 1.9 | 3.9E-02 | 0.28  | 3.5E-01 |
| <i>BCL2L11</i>  | 2.2 | 2.9E-02 | 0.39 | 6.3E-02 | <i>COL6A3</i>  | 1.9 | 4.4E-02 | 0.49  | 4.9E-02 |
| <i>SDF2</i>     | 2.2 | 1.5E-02 | 0.49 | 2.2E-02 | <i>TDRD7</i>   | 1.9 | 3.2E-02 | 0.48  | 5.4E-02 |
| <i>SDCCAG3</i>  | 2.2 | 1.4E-02 | 0.28 | 1.7E-01 | <i>PDE4B</i>   | 1.9 | 1.6E-02 | 0.07  | 8.6E-01 |
| <i>RDH10</i>    | 2.2 | 3.1E-02 | 0.48 | 2.3E-02 | <i>ANXA5</i>   | 1.9 | 2.1E-02 | 0.40  | 1.4E-01 |
| <i>WLS</i>      | 2.2 | 1.7E-02 | 0.39 | 6.3E-02 | <i>SETD7</i>   | 1.9 | 1.3E-02 | -0.33 | 2.6E-01 |
| <i>MCM2</i>     | 2.2 | 4.4E-02 | 0.03 | 9.0E-01 | <i>HIKESHI</i> | 1.9 | 1.3E-02 | 0.25  | 4.1E-01 |
| <i>OAT</i>      | 2.2 | 2.7E-02 | 0.50 | 1.9E-02 | <i>TNFAIP8</i> | 1.9 | 1.3E-02 | -0.03 | 9.3E-01 |
| <i>GTF2AI</i>   | 2.2 | 3.7E-03 | 0.39 | 6.5E-02 | <i>ADA2</i>    | 1.9 | 6.5E-03 | 0.46  | 6.5E-02 |
| <i>AMY2B</i>    | 2.2 | 2.0E-02 | 0.25 | 2.2E-01 | <i>ORC6</i>    | 1.9 | 2.6E-02 | -0.35 | 2.2E-01 |
| <i>DUS3L</i>    | 2.2 | 1.9E-02 | 0.02 | 9.4E-01 | <i>GLRX</i>    | 1.9 | 3.3E-02 | 0.54  | 2.6E-02 |

|                 |     |         |      |         |                 |     |         |       |         |
|-----------------|-----|---------|------|---------|-----------------|-----|---------|-------|---------|
| <i>TMEM206</i>  | 2.2 | 2.4E-02 | 0.29 | 1.6E-01 | <i>CARD8</i>    | 1.9 | 7.0E-03 | 0.18  | 5.7E-01 |
| <i>ZBTB5</i>    | 2.2 | 2.5E-02 | 0.31 | 1.4E-01 | <i>ORAI2</i>    | 1.9 | 3.4E-02 | 0.12  | 7.4E-01 |
| <i>PAN2</i>     | 2.2 | 2.5E-02 | 0.46 | 3.1E-02 | <i>RAP2A</i>    | 1.9 | 2.5E-02 | 0.11  | 7.6E-01 |
| <i>SIRPA</i>    | 2.2 | 1.8E-02 | 0.43 | 4.2E-02 | <i>GIMAP8</i>   | 1.9 | 4.0E-02 | 0.21  | 5.1E-01 |
| <i>CLDN7</i>    | 2.2 | 9.1E-03 | 0.60 | 3.7E-03 | <i>LRP8</i>     | 1.9 | 2.0E-02 | -0.53 | 2.8E-02 |
| <i>SGCE</i>     | 2.2 | 4.2E-02 | 0.27 | 1.9E-01 | <i>HAPLN3</i>   | 1.9 | 2.4E-02 | 0.03  | 9.3E-01 |
| <i>TMIGD3</i>   | 2.2 | 3.7E-02 | 0.35 | 9.3E-02 | <i>ICAM1</i>    | 1.9 | 2.6E-02 | -0.18 | 5.7E-01 |
| <i>DTX3</i>     | 2.2 | 2.7E-02 | 0.24 | 2.4E-01 | <i>PI4K2B</i>   | 1.9 | 4.3E-02 | 0.12  | 7.3E-01 |
| <i>C15orf48</i> | 2.2 | 1.1E-02 | 0.30 | 1.5E-01 | <i>TIFA</i>     | 1.8 | 4.5E-02 | 0.46  | 6.5E-02 |
| <i>TNS3</i>     | 2.2 | 2.2E-02 | 0.62 | 2.5E-03 | <i>FSTL1</i>    | 1.8 | 2.9E-02 | 0.19  | 5.3E-01 |
| <i>CD276</i>    | 2.2 | 1.0E-02 | 0.29 | 1.7E-01 | <i>ARHGAP15</i> | 1.8 | 4.3E-02 | 0.09  | 8.0E-01 |
| <i>ISCA2</i>    | 2.2 | 6.2E-03 | 0.36 | 9.1E-02 | <i>GCH1</i>     | 1.8 | 3.5E-03 | 0.43  | 9.7E-02 |
| <i>GADD45B</i>  | 2.2 | 4.0E-02 | 0.62 | 2.5E-03 | <i>SYT11</i>    | 1.8 | 2.7E-02 | 0.14  | 6.7E-01 |
| <i>TICAM1</i>   | 2.2 | 3.3E-02 | 0.30 | 1.5E-01 | <i>FKBP5</i>    | 1.8 | 1.3E-02 | -0.02 | 9.6E-01 |
| <i>ZBED6CL</i>  | 2.2 | 4.7E-02 | 0.14 | 5.0E-01 | <i>DBF4</i>     | 1.8 | 3.9E-02 | -0.07 | 8.4E-01 |
| <i>TEAD3</i>    | 2.2 | 2.1E-02 | 0.03 | 9.0E-01 | <i>FAM46C</i>   | 1.8 | 4.3E-02 | -0.02 | 9.7E-01 |
| <i>MS4A4A</i>   | 2.2 | 3.8E-02 | 0.41 | 5.5E-02 | <i>LILRB4</i>   | 1.8 | 3.3E-02 | 0.05  | 8.9E-01 |
| <i>LST1</i>     | 2.2 | 4.5E-02 | 0.52 | 1.5E-02 | <i>CKLF</i>     | 1.8 | 1.9E-02 | 0.40  | 1.3E-01 |
| <i>F2RL1</i>    | 2.1 | 2.2E-02 | 0.51 | 1.6E-02 | <i>TVP23B</i>   | 1.8 | 2.7E-02 | 0.00  | 1.0E+00 |
| <i>ZFAND1</i>   | 2.1 | 1.9E-02 | 0.20 | 3.2E-01 | <i>MALT1</i>    | 1.8 | 2.5E-03 | -0.25 | 4.0E-01 |
| <i>FAM117A</i>  | 2.1 | 8.8E-03 | 0.04 | 8.4E-01 | <i>MANF</i>     | 1.8 | 7.7E-03 | 0.27  | 3.6E-01 |
| <i>VIM</i>      | 2.1 | 2.2E-02 | 0.50 | 1.9E-02 | <i>PELO</i>     | 1.8 | 1.4E-02 | -0.20 | 5.2E-01 |
| <i>PATL1</i>    | 2.1 | 2.2E-02 | 0.28 | 1.7E-01 | <i>MYD88</i>    | 1.8 | 6.3E-03 | 0.27  | 3.6E-01 |
| <i>CCL11</i>    | 2.1 | 5.0E-02 | 0.78 | 4.5E-05 | <i>ELOVL5</i>   | 1.8 | 1.4E-02 | 0.18  | 5.7E-01 |
| <i>CNKSR1</i>   | 2.1 | 3.7E-02 | 0.30 | 1.5E-01 | <i>RBPMS</i>    | 1.8 | 3.2E-02 | 0.19  | 5.4E-01 |
| <i>MXD3</i>     | 2.1 | 4.3E-02 | 0.19 | 3.5E-01 | <i>CCDC102B</i> | 1.8 | 3.2E-02 | -0.02 | 9.7E-01 |
| <i>RNPEP</i>    | 2.1 | 5.7E-03 | 0.34 | 1.1E-01 | <i>SYVN1</i>    | 1.8 | 2.1E-02 | 0.21  | 5.0E-01 |
| <i>DNAJA3</i>   | 2.1 | 3.2E-02 | 0.26 | 2.1E-01 | <i>TRAM1</i>    | 1.8 | 3.8E-02 | 0.47  | 5.9E-02 |
| <i>PODXL</i>    | 2.1 | 1.1E-02 | 0.25 | 2.1E-01 | <i>QKI</i>      | 1.8 | 6.9E-03 | 0.42  | 1.1E-01 |
| <i>ZDHHC5</i>   | 2.1 | 6.7E-03 | 0.55 | 1.1E-02 | <i>MYC</i>      | 1.8 | 1.6E-02 | 0.34  | 2.4E-01 |
| <i>NR1I2</i>    | 2.1 | 1.6E-02 | 0.44 | 4.0E-02 | <i>HPS5</i>     | 1.8 | 3.4E-02 | 0.06  | 8.7E-01 |
| <i>ADAMDEC1</i> | 2.1 | 1.6E-03 | 0.51 | 1.6E-02 | <i>C1R</i>      | 1.8 | 1.2E-02 | 0.24  | 4.2E-01 |
| <i>MDH1</i>     | 2.1 | 4.6E-03 | 0.33 | 1.2E-01 | <i>WRAP73</i>   | 1.8 | 1.3E-03 | 0.32  | 2.7E-01 |
| <i>NUDT21</i>   | 2.1 | 2.0E-02 | 0.29 | 1.6E-01 | <i>PIM3</i>     | 1.8 | 2.1E-03 | -0.41 | 1.2E-01 |
| <i>UBL5</i>     | 2.1 | 3.0E-02 | 0.05 | 8.2E-01 | <i>MCFD2</i>    | 1.8 | 1.9E-02 | -0.27 | 3.7E-01 |
| <i>NECAP2</i>   | 2.1 | 1.8E-03 | 0.45 | 3.4E-02 | <i>IRF7</i>     | 1.8 | 1.4E-03 | 0.25  | 4.0E-01 |
| <i>PLCG2</i>    | 2.1 | 2.1E-02 | 0.13 | 5.3E-01 | <i>GLCC11</i>   | 1.8 | 2.8E-02 | 0.04  | 9.1E-01 |
| <i>COL3A1</i>   | 2.1 | 4.4E-02 | 0.60 | 3.7E-03 | <i>NCOA7</i>    | 1.8 | 1.5E-02 | 0.18  | 5.5E-01 |
| <i>QSOX2</i>    | 2.1 | 2.8E-02 | 0.45 | 3.4E-02 | <i>C1orf174</i> | 1.8 | 1.4E-02 | 0.34  | 2.3E-01 |
| <i>PLAU</i>     | 2.1 | 4.8E-02 | 0.42 | 5.0E-02 | <i>MCM2</i>     | 1.8 | 4.3E-02 | 0.03  | 9.5E-01 |
| <i>CHEK2</i>    | 2.1 | 1.9E-02 | 0.25 | 2.2E-01 | <i>CTSC</i>     | 1.8 | 1.8E-04 | 0.61  | 9.9E-03 |
| <i>ADD1</i>     | 2.1 | 5.7E-03 | 0.53 | 1.1E-02 | <i>RBMS1</i>    | 1.8 | 3.8E-02 | 0.30  | 3.0E-01 |
| <i>JOSD1</i>    | 2.1 | 3.3E-03 | 0.70 | 5.5E-04 | <i>ABCB10</i>   | 1.8 | 1.0E-02 | 0.47  | 5.8E-02 |
| <i>ZFP36L2</i>  | 2.1 | 1.3E-02 | 0.33 | 1.1E-01 | <i>AKAP2</i>    | 1.8 | 1.4E-02 | 0.00  | 1.0E+00 |

|                |     |         |       |         |                 |     |         |       |         |
|----------------|-----|---------|-------|---------|-----------------|-----|---------|-------|---------|
| <i>ETNK1</i>   | 2.1 | 1.4E-02 | 0.70  | 5.5E-04 | <i>MTMR6</i>    | 1.8 | 2.8E-04 | 0.08  | 8.4E-01 |
| <i>LZTS2</i>   | 2.1 | 2.3E-02 | 0.48  | 2.5E-02 | <i>PIP4K2A</i>  | 1.8 | 1.1E-02 | 0.38  | 1.6E-01 |
| <i>C2</i>      | 2.1 | 3.8E-02 | 0.56  | 8.5E-03 | <i>FAM49A</i>   | 1.7 | 3.4E-03 | 0.23  | 4.6E-01 |
| <i>ZNF816</i>  | 2.1 | 4.6E-02 | 0.52  | 1.5E-02 | <i>ZC3H7B</i>   | 1.7 | 2.0E-02 | 0.26  | 3.8E-01 |
| <i>MRPS14</i>  | 2.1 | 2.8E-02 | 0.24  | 2.3E-01 | <i>LMO4</i>     | 1.7 | 2.3E-02 | 0.22  | 4.7E-01 |
| <i>DYRK4</i>   | 2.1 | 4.9E-02 | 0.26  | 2.0E-01 | <i>TRAFD1</i>   | 1.7 | 4.0E-02 | 0.29  | 3.3E-01 |
| <i>ADA2</i>    | 2.1 | 1.3E-02 | 0.46  | 3.0E-02 | <i>SLC25A28</i> | 1.7 | 7.3E-03 | -0.09 | 8.0E-01 |
| <i>HBP1</i>    | 2.1 | 1.9E-02 | 0.41  | 5.5E-02 | <i>H2AFX</i>    | 1.7 | 1.1E-02 | 0.12  | 7.1E-01 |
| <i>RCCI</i>    | 2.1 | 5.1E-03 | 0.40  | 6.0E-02 | <i>AMPD2</i>    | 1.7 | 2.4E-02 | 0.20  | 5.2E-01 |
| <i>MAT2B</i>   | 2.1 | 7.4E-03 | 0.36  | 8.7E-02 | <i>CYTH4</i>    | 1.7 | 5.5E-03 | -0.15 | 6.6E-01 |
| <i>WDR11</i>   | 2.1 | 2.1E-02 | 0.19  | 3.5E-01 | <i>TFEC</i>     | 1.7 | 1.2E-02 | 0.28  | 3.4E-01 |
| <i>CCNG1</i>   | 2.0 | 4.6E-03 | 0.25  | 2.1E-01 | <i>ALKBH5</i>   | 1.7 | 1.2E-02 | 0.34  | 2.4E-01 |
| <i>SLC38A9</i> | 2.0 | 3.4E-02 | 0.32  | 1.3E-01 | <i>CHPT1</i>    | 1.7 | 1.5E-02 | 0.28  | 3.3E-01 |
| <i>GTF3C2</i>  | 2.0 | 3.8E-02 | 0.23  | 2.7E-01 | <i>ST3GAL1</i>  | 1.7 | 3.6E-02 | -0.04 | 9.2E-01 |
| <i>ANXA5</i>   | 2.0 | 4.1E-02 | 0.40  | 6.2E-02 | <i>SP110</i>    | 1.7 | 5.3E-03 | -0.05 | 8.9E-01 |
| <i>KBTD3</i>   | 2.0 | 9.5E-03 | 0.12  | 5.7E-01 | <i>PSMB8</i>    | 1.7 | 3.3E-02 | 0.31  | 2.8E-01 |
| <i>SNRPF</i>   | 2.0 | 3.5E-02 | -0.06 | 7.7E-01 | <i>RNF145</i>   | 1.7 | 2.8E-03 | 0.18  | 5.7E-01 |
| <i>LTA4H</i>   | 2.0 | 3.1E-03 | 0.54  | 1.1E-02 | <i>LINS1</i>    | 1.7 | 2.6E-02 | 0.20  | 5.2E-01 |
| <i>TRAM1</i>   | 2.0 | 4.4E-02 | 0.47  | 2.6E-02 | <i>ARID3A</i>   | 1.7 | 2.8E-02 | 0.48  | 5.1E-02 |
| <i>ZNF598</i>  | 2.0 | 4.1E-02 | 0.22  | 2.7E-01 | <i>TCIRG1</i>   | 1.7 | 2.7E-02 | -0.16 | 6.1E-01 |
| <i>XYLT1</i>   | 2.0 | 1.8E-02 | 0.54  | 1.1E-02 | <i>CREB3L2</i>  | 1.7 | 4.7E-03 | 0.41  | 1.2E-01 |
| <i>AMPD2</i>   | 2.0 | 5.0E-02 | 0.20  | 3.3E-01 | <i>PPT1</i>     | 1.7 | 3.6E-03 | 0.25  | 4.1E-01 |
| <i>ARMC8</i>   | 2.0 | 1.8E-02 | 0.21  | 3.0E-01 | <i>IL15RA</i>   | 1.7 | 4.2E-02 | 0.55  | 2.1E-02 |
| <i>FERMT2</i>  | 2.0 | 2.7E-02 | 0.51  | 1.6E-02 | <i>FAM241B</i>  | 1.7 | 1.6E-02 | 0.13  | 7.1E-01 |
| <i>PHF1</i>    | 2.0 | 4.3E-03 | 0.10  | 6.2E-01 | <i>MAFB</i>     | 1.7 | 2.9E-03 | 0.42  | 1.1E-01 |
| <i>LYPLA1</i>  | 2.0 | 4.2E-02 | 0.45  | 3.6E-02 | <i>HIF1A</i>    | 1.7 | 7.3E-03 | 0.21  | 4.9E-01 |
| <i>TADA2B</i>  | 2.0 | 9.2E-03 | 0.33  | 1.2E-01 | <i>CDK17</i>    | 1.7 | 5.1E-03 | 0.33  | 2.6E-01 |
| <i>WDR48</i>   | 2.0 | 1.3E-02 | 0.52  | 1.4E-02 | <i>FAM3C</i>    | 1.7 | 4.9E-03 | -0.20 | 5.2E-01 |
| <i>TSEN54</i>  | 2.0 | 2.6E-02 | 0.36  | 8.7E-02 | <i>RNF213</i>   | 1.7 | 1.3E-02 | 0.32  | 2.8E-01 |
| <i>C1QBP</i>   | 2.0 | 3.1E-02 | 0.06  | 7.9E-01 | <i>ELOC</i>     | 1.7 | 1.0E-02 | 0.28  | 3.5E-01 |
| <i>CTSC</i>    | 2.0 | 8.5E-03 | 0.61  | 3.5E-03 | <i>COTL1</i>    | 1.7 | 4.2E-02 | 0.12  | 7.1E-01 |
| <i>WASHC5</i>  | 2.0 | 4.3E-02 | 0.19  | 3.4E-01 | <i>KLHL2</i>    | 1.7 | 4.0E-02 | -0.01 | 9.7E-01 |
| <i>SIK3</i>    | 2.0 | 3.1E-02 | 0.41  | 5.5E-02 | <i>ZBTB17</i>   | 1.7 | 3.1E-02 | 0.23  | 4.5E-01 |
| <i>GON7</i>    | 2.0 | 8.1E-03 | 0.32  | 1.3E-01 | <i>WDR11</i>    | 1.7 | 5.7E-03 | 0.19  | 5.3E-01 |
| <i>RBM27</i>   | 2.0 | 2.0E-02 | 0.19  | 3.6E-01 | <i>PIEZO1</i>   | 1.7 | 3.5E-02 | 0.25  | 4.0E-01 |
| <i>LEFTY1</i>  | 2.0 | 4.6E-02 | 0.05  | 8.1E-01 | <i>MAGEF1</i>   | 1.7 | 1.0E-02 | 0.01  | 9.7E-01 |
| <i>PYCARD</i>  | 2.0 | 1.3E-02 | 0.28  | 1.7E-01 | <i>MMP25</i>    | 1.7 | 1.8E-02 | 0.43  | 9.7E-02 |
| <i>LSMI4B</i>  | 2.0 | 1.6E-02 | 0.28  | 1.7E-01 | <i>ODC1</i>     | 1.7 | 3.6E-02 | -0.16 | 6.1E-01 |
| <i>RPS18</i>   | 2.0 | 1.2E-02 | 0.07  | 7.3E-01 | <i>DCTN6</i>    | 1.7 | 4.2E-02 | 0.15  | 6.4E-01 |
| <i>KCTD5</i>   | 2.0 | 3.8E-02 | 0.51  | 1.6E-02 | <i>ASAP1</i>    | 1.7 | 1.2E-02 | -0.03 | 9.5E-01 |
| <i>PYURF</i>   | 2.0 | 3.5E-02 | 0.45  | 3.4E-02 | <i>HRH2</i>     | 1.7 | 1.3E-02 | 0.38  | 1.6E-01 |
| <i>GCHFR</i>   | 2.0 | 3.1E-02 | 0.16  | 4.2E-01 | <i>RHOQ</i>     | 1.7 | 6.7E-03 | 0.10  | 7.8E-01 |
| <i>MANSC1</i>  | 2.0 | 3.2E-02 | 0.41  | 5.5E-02 | <i>RRP15</i>    | 1.7 | 8.1E-04 | -0.43 | 9.7E-02 |
| <i>EFNB1</i>   | 2.0 | 3.8E-02 | 0.40  | 6.2E-02 | <i>DSE</i>      | 1.7 | 2.5E-02 | 0.19  | 5.3E-01 |

|                 |     |         |       |         |                 |     |         |       |         |
|-----------------|-----|---------|-------|---------|-----------------|-----|---------|-------|---------|
| <i>DENND6A</i>  | 2.0 | 5.0E-02 | 0.57  | 6.9E-03 | <i>ELK1</i>     | 1.6 | 4.2E-02 | 0.22  | 4.6E-01 |
| <i>SLC44A3</i>  | 2.0 | 2.5E-02 | 0.37  | 8.0E-02 | <i>BTN3A1</i>   | 1.6 | 1.5E-02 | -0.13 | 7.1E-01 |
| <i>KDM6B</i>    | 2.0 | 2.5E-02 | 0.44  | 4.0E-02 | <i>PAPSS1</i>   | 1.6 | 3.7E-02 | 0.24  | 4.2E-01 |
| <i>PIP4P1</i>   | 2.0 | 4.0E-02 | 0.13  | 5.4E-01 | <i>SH3BP4</i>   | 1.6 | 4.6E-02 | 0.08  | 8.4E-01 |
| <i>KDM4C</i>    | 2.0 | 1.2E-02 | 0.57  | 7.6E-03 | <i>SNRPF</i>    | 1.6 | 7.6E-03 | -0.06 | 8.7E-01 |
| <i>RPS27</i>    | 2.0 | 3.7E-02 | 0.06  | 7.7E-01 | <i>HELZ2</i>    | 1.6 | 4.5E-02 | 0.36  | 2.1E-01 |
| <i>FAM122A</i>  | 1.9 | 3.7E-02 | 0.18  | 3.7E-01 | <i>C1GALT1</i>  | 1.6 | 4.1E-03 | 0.39  | 1.4E-01 |
| <i>GPR82</i>    | 1.9 | 5.0E-02 | 0.55  | 9.7E-03 | <i>IGIP</i>     | 1.6 | 4.5E-02 | 0.25  | 4.0E-01 |
| <i>MINOS1</i>   | 1.9 | 4.0E-02 | 0.30  | 1.5E-01 | <i>MTMR14</i>   | 1.6 | 1.5E-02 | 0.20  | 5.2E-01 |
| <i>AP3MI</i>    | 1.9 | 4.3E-03 | 0.31  | 1.4E-01 | <i>CASP4</i>    | 1.6 | 3.6E-02 | -0.19 | 5.4E-01 |
| <i>RFT1</i>     | 1.9 | 4.4E-02 | 0.21  | 3.0E-01 | <i>HLA-DPA1</i> | 1.6 | 1.2E-02 | 0.17  | 5.9E-01 |
| <i>HSPA8</i>    | 1.9 | 4.7E-02 | 0.08  | 7.2E-01 | <i>RASGEF1B</i> | 1.6 | 4.8E-02 | 0.01  | 9.7E-01 |
| <i>FASTKD3</i>  | 1.9 | 4.4E-02 | 0.55  | 1.1E-02 | <i>FBXW11</i>   | 1.6 | 1.3E-02 | 0.46  | 6.8E-02 |
| <i>LIX1L</i>    | 1.9 | 4.8E-02 | 0.26  | 2.0E-01 | <i>SESTD1</i>   | 1.6 | 1.5E-02 | -0.54 | 2.5E-02 |
| <i>UMAD1</i>    | 1.9 | 3.2E-02 | 0.23  | 2.5E-01 | <i>CARD16</i>   | 1.6 | 3.7E-02 | 0.31  | 3.0E-01 |
| <i>NCAPG2</i>   | 1.9 | 1.1E-02 | -0.01 | 9.6E-01 | <i>TRAF1</i>    | 1.6 | 2.6E-02 | -0.09 | 8.1E-01 |
| <i>ATP6V0D2</i> | 1.9 | 4.4E-02 | 0.32  | 1.3E-01 | <i>NUCB2</i>    | 1.6 | 2.3E-02 | -0.57 | 1.4E-02 |
| <i>DENND3</i>   | 1.9 | 2.1E-02 | 0.38  | 7.4E-02 | <i>TGFBR2</i>   | 1.6 | 1.7E-02 | 0.27  | 3.7E-01 |
| <i>SPATA33</i>  | 1.9 | 4.7E-02 | -0.06 | 7.7E-01 | <i>STAT5A</i>   | 1.6 | 3.5E-02 | 0.22  | 4.6E-01 |
| <i>HIGD2A</i>   | 1.9 | 1.7E-02 | -0.01 | 9.6E-01 | <i>MARCKSL1</i> | 1.6 | 4.7E-02 | 0.25  | 4.1E-01 |
| <i>PCMTD2</i>   | 1.9 | 3.5E-02 | 0.48  | 2.5E-02 | <i>TC2N</i>     | 1.6 | 9.2E-03 | -0.24 | 4.2E-01 |
| <i>PNMA1</i>    | 1.9 | 1.3E-02 | 0.27  | 1.9E-01 | <i>PPA1</i>     | 1.6 | 9.4E-03 | 0.22  | 4.8E-01 |
| <i>QPCT</i>     | 1.9 | 4.3E-02 | 0.63  | 2.3E-03 | <i>CCDC69</i>   | 1.6 | 2.0E-02 | 0.11  | 7.6E-01 |
| <i>PPP1R14C</i> | 1.9 | 9.1E-03 | 0.49  | 2.2E-02 | <i>RBI</i>      | 1.6 | 4.9E-03 | 0.25  | 4.0E-01 |
| <i>USP32</i>    | 1.9 | 2.8E-02 | 0.48  | 2.4E-02 | <i>PEA15</i>    | 1.6 | 1.9E-02 | -0.29 | 3.3E-01 |
| <i>ANXA4</i>    | 1.9 | 4.2E-03 | 0.41  | 5.5E-02 | <i>PRKAR2B</i>  | 1.6 | 3.8E-02 | -0.33 | 2.4E-01 |
| <i>SMIM20</i>   | 1.9 | 4.2E-02 | 0.34  | 1.0E-01 | <i>PHC2</i>     | 1.6 | 3.9E-02 | 0.37  | 1.9E-01 |
| <i>NUS1</i>     | 1.9 | 8.5E-03 | 0.45  | 3.7E-02 | <i>PPP1R2</i>   | 1.6 | 3.9E-03 | 0.16  | 6.2E-01 |
| <i>ARPC1A</i>   | 1.9 | 1.5E-02 | 0.08  | 7.0E-01 | <i>RGL1</i>     | 1.6 | 1.4E-02 | 0.49  | 4.9E-02 |
| <i>RASSF5</i>   | 1.9 | 1.2E-02 | 0.34  | 1.1E-01 | <i>M6PR</i>     | 1.6 | 4.9E-03 | 0.30  | 3.0E-01 |
| <i>PEX5</i>     | 1.9 | 2.1E-02 | 0.22  | 2.8E-01 | <i>C19orf66</i> | 1.6 | 4.0E-02 | 0.38  | 1.6E-01 |
| <i>COG3</i>     | 1.9 | 4.3E-02 | 0.22  | 2.8E-01 | <i>AIF1</i>     | 1.6 | 1.4E-02 | -0.01 | 9.7E-01 |
| <i>DERL1</i>    | 1.9 | 1.6E-02 | 0.49  | 2.2E-02 | <i>CD44</i>     | 1.6 | 1.2E-02 | 0.21  | 4.9E-01 |
| <i>PLK2</i>     | 1.9 | 5.0E-02 | 0.02  | 9.4E-01 | <i>CREM</i>     | 1.6 | 2.7E-02 | 0.09  | 8.0E-01 |
| <i>NDUFC2</i>   | 1.9 | 4.7E-02 | 0.06  | 7.8E-01 | <i>SEMA4A</i>   | 1.6 | 1.4E-02 | 0.08  | 8.4E-01 |
| <i>DACH1</i>    | 1.9 | 2.5E-02 | 0.40  | 5.9E-02 | <i>ZNF618</i>   | 1.6 | 4.6E-02 | -0.14 | 6.8E-01 |
| <i>WDR26</i>    | 1.9 | 1.9E-03 | 0.41  | 5.2E-02 | <i>MARS</i>     | 1.6 | 2.3E-02 | -0.49 | 4.8E-02 |
| <i>THAP11</i>   | 1.9 | 8.5E-03 | 0.36  | 9.0E-02 | <i>LMAN1</i>    | 1.6 | 4.3E-03 | -0.23 | 4.5E-01 |
| <i>CDAN1</i>    | 1.9 | 3.0E-02 | 0.21  | 3.0E-01 | <i>TNFRSF1B</i> | 1.6 | 1.9E-02 | 0.09  | 8.1E-01 |
| <i>ABHD17B</i>  | 1.9 | 2.3E-02 | 0.00  | 9.9E-01 | <i>BICDL1</i>   | 1.6 | 1.6E-02 | 0.04  | 9.2E-01 |
| <i>KLF7</i>     | 1.9 | 1.9E-02 | 0.33  | 1.2E-01 | <i>SLC1A4</i>   | 1.6 | 2.6E-03 | -0.14 | 6.7E-01 |
| <i>ERLIN1</i>   | 1.9 | 1.8E-02 | 0.15  | 4.6E-01 | <i>STAT2</i>    | 1.6 | 1.9E-02 | 0.24  | 4.2E-01 |
| <i>INTS4</i>    | 1.9 | 2.7E-02 | 0.33  | 1.2E-01 | <i>JADE1</i>    | 1.6 | 2.5E-02 | -0.10 | 8.0E-01 |
| <i>PRDX3</i>    | 1.9 | 1.3E-02 | 0.02  | 9.4E-01 | <i>MLKL</i>     | 1.6 | 1.3E-02 | -0.20 | 5.2E-01 |

|                 |     |         |      |         |                 |      |         |       |         |
|-----------------|-----|---------|------|---------|-----------------|------|---------|-------|---------|
| <i>AIDA</i>     | 1.9 | 4.1E-02 | 0.37 | 7.7E-02 | <i>GART</i>     | 1.6  | 1.9E-03 | 0.39  | 1.4E-01 |
| <i>MYL12B</i>   | 1.9 | 1.8E-02 | 0.48 | 2.3E-02 | <i>GTF2A1</i>   | 1.6  | 4.7E-03 | 0.39  | 1.4E-01 |
| <i>SLC35B3</i>  | 1.9 | 2.2E-02 | 0.42 | 4.7E-02 | <i>MX1</i>      | 1.5  | 1.2E-02 | -0.04 | 9.2E-01 |
| <i>FPR1</i>     | 1.9 | 4.9E-02 | 0.48 | 2.5E-02 | <i>IL6ST</i>    | 1.5  | 1.5E-02 | 0.40  | 1.3E-01 |
| <i>MT-CO2</i>   | 1.9 | 5.7E-03 | 0.36 | 8.9E-02 | <i>MYO1F</i>    | 1.5  | 2.1E-02 | 0.33  | 2.4E-01 |
| <i>ERBB2</i>    | 1.9 | 2.5E-02 | 0.62 | 2.9E-03 | <i>IL1R1</i>    | 1.5  | 4.7E-02 | 0.40  | 1.3E-01 |
| <i>CAMTA1</i>   | 1.9 | 4.2E-02 | 0.44 | 3.9E-02 | <i>CXXC5</i>    | 1.5  | 3.3E-02 | -0.09 | 8.1E-01 |
| <i>GATA2</i>    | 1.9 | 2.1E-02 | 0.27 | 1.9E-01 | <i>FCER1G</i>   | 1.5  | 3.3E-02 | 0.08  | 8.4E-01 |
| <i>MAFG</i>     | 1.9 | 1.9E-02 | 0.35 | 1.0E-01 | <i>NUS1</i>     | 1.5  | 4.3E-03 | 0.45  | 8.2E-02 |
| <i>CASP9</i>    | 1.9 | 5.0E-02 | 0.12 | 5.6E-01 | <i>LIPA</i>     | 1.5  | 4.4E-02 | 0.45  | 8.2E-02 |
| <i>SERTAD3</i>  | 1.9 | 3.4E-02 | 0.25 | 2.2E-01 | <i>GLS</i>      | 1.5  | 9.3E-03 | 0.38  | 1.7E-01 |
| <i>HTT</i>      | 1.9 | 7.6E-03 | 0.53 | 1.2E-02 | <i>OST4</i>     | 1.5  | 3.9E-02 | 0.20  | 5.2E-01 |
| <i>PSMB8</i>    | 1.9 | 3.5E-02 | 0.31 | 1.3E-01 | <i>MYCBP2</i>   | 1.5  | 2.7E-02 | 0.30  | 3.0E-01 |
| <i>FUCA2</i>    | 1.9 | 1.9E-02 | 0.24 | 2.4E-01 | <i>UBE2J1</i>   | 1.5  | 1.2E-02 | 0.19  | 5.4E-01 |
| <i>TAF4</i>     | 1.9 | 4.0E-03 | 0.47 | 2.7E-02 | <i>ZNF267</i>   | 1.5  | 4.0E-02 | -0.09 | 8.1E-01 |
| <i>RPL17</i>    | 1.9 | 9.3E-03 | 0.20 | 3.3E-01 | <i>PATL1</i>    | 1.5  | 3.8E-02 | 0.28  | 3.4E-01 |
| <i>SI00A6</i>   | 1.9 | 8.4E-03 | 0.28 | 1.7E-01 | <i>IRAK4</i>    | 1.5  | 2.6E-02 | 0.24  | 4.2E-01 |
| <i>TMEM70</i>   | 1.9 | 9.2E-03 | 0.13 | 5.4E-01 | <i>PHACTR4</i>  | -1.5 | 1.1E-02 | -0.25 | 4.1E-01 |
| <i>CCT4</i>     | 1.9 | 8.2E-03 | 0.16 | 4.2E-01 | <i>SLC25A39</i> | -1.5 | 2.2E-02 | 0.13  | 7.1E-01 |
| <i>HLA-DPA1</i> | 1.9 | 1.1E-02 | 0.17 | 4.1E-01 | <i>COX10</i>    | -1.5 | 1.1E-02 | -0.17 | 5.9E-01 |
| <i>HERC5</i>    | 1.9 | 4.8E-02 | 0.25 | 2.2E-01 | <i>PFKL</i>     | -1.5 | 1.5E-02 | -0.06 | 8.7E-01 |
| <i>COMT</i>     | 1.9 | 1.2E-02 | 0.22 | 2.8E-01 | <i>ZNF20</i>    | -1.5 | 2.8E-02 | -0.07 | 8.4E-01 |
| <i>EIF3H</i>    | 1.9 | 1.1E-02 | 0.11 | 5.9E-01 | <i>GATB</i>     | -1.5 | 4.6E-02 | -0.02 | 9.7E-01 |
| <i>SOX13</i>    | 1.8 | 2.4E-02 | 0.29 | 1.6E-01 | <i>SPRY1</i>    | -1.5 | 1.2E-02 | 0.32  | 2.7E-01 |
| <i>ATP6V1H</i>  | 1.8 | 3.3E-03 | 0.41 | 5.4E-02 | <i>HCRT</i>     | -1.5 | 4.8E-02 | -0.04 | 9.2E-01 |
| <i>SLC25A5</i>  | 1.8 | 1.8E-02 | 0.53 | 1.2E-02 | <i>ISCA1</i>    | -1.5 | 6.1E-03 | 0.29  | 3.2E-01 |
| <i>WIPI1</i>    | 1.8 | 3.3E-02 | 0.32 | 1.2E-01 | <i>HADHA</i>    | -1.5 | 1.4E-02 | 0.21  | 5.0E-01 |
| <i>POLR1D</i>   | 1.8 | 3.8E-03 | 0.30 | 1.5E-01 | <i>ITPR3</i>    | -1.5 | 4.1E-02 | 0.35  | 2.2E-01 |
| <i>LPGAT1</i>   | 1.8 | 4.8E-02 | 0.49 | 2.0E-02 | <i>PWWP2B</i>   | -1.5 | 2.4E-02 | -0.01 | 9.8E-01 |
| <i>KIAA1147</i> | 1.8 | 1.6E-02 | 0.26 | 2.0E-01 | <i>ADCK2</i>    | -1.5 | 1.6E-02 | -0.20 | 5.2E-01 |
| <i>PLXND1</i>   | 1.8 | 1.6E-02 | 0.42 | 4.6E-02 | <i>LEXM</i>     | -1.5 | 2.7E-02 | -0.11 | 7.6E-01 |
| <i>PEF1</i>     | 1.8 | 1.6E-02 | 0.26 | 2.0E-01 | <i>NBPF1</i>    | -1.5 | 3.9E-02 | -0.08 | 8.2E-01 |
| <i>COX7A2L</i>  | 1.8 | 4.2E-03 | 0.37 | 7.7E-02 | <i>EXOC3</i>    | -1.5 | 3.1E-02 | 0.67  | 3.4E-03 |
| <i>PGLS</i>     | 1.8 | 2.6E-02 | 0.41 | 5.3E-02 | <i>URGCP</i>    | -1.5 | 2.8E-02 | -0.29 | 3.3E-01 |
| <i>DYNLT3</i>   | 1.8 | 1.9E-03 | 0.28 | 1.8E-01 | <i>MRPS18B</i>  | -1.5 | 2.0E-02 | -0.32 | 2.7E-01 |
| <i>RPL27</i>    | 1.8 | 1.1E-02 | 0.27 | 1.9E-01 | <i>PEBP1</i>    | -1.5 | 2.7E-02 | 0.30  | 3.0E-01 |
| <i>LAMP2</i>    | 1.8 | 5.7E-03 | 0.61 | 3.5E-03 | <i>TSTD1</i>    | -1.5 | 3.3E-03 | -0.30 | 3.0E-01 |
| <i>SOD2</i>     | 1.8 | 6.5E-03 | 0.35 | 9.6E-02 | <i>IL10RB</i>   | -1.5 | 1.0E-02 | -0.19 | 5.4E-01 |
| <i>ARF4</i>     | 1.8 | 4.3E-02 | 0.06 | 7.7E-01 | <i>DDO</i>      | -1.5 | 4.0E-03 | -0.26 | 3.8E-01 |
| <i>HERPUD1</i>  | 1.8 | 4.1E-02 | 0.23 | 2.6E-01 | <i>SPR</i>      | -1.5 | 4.5E-02 | -0.16 | 6.0E-01 |
| <i>ARHGAP27</i> | 1.8 | 2.9E-02 | 0.14 | 4.8E-01 | <i>C11orf71</i> | -1.5 | 3.2E-02 | -0.15 | 6.4E-01 |
| <i>LAMTOR3</i>  | 1.8 | 5.4E-03 | 0.36 | 8.5E-02 | <i>MBOAT7</i>   | -1.5 | 4.7E-03 | -0.03 | 9.4E-01 |
| <i>TOR1A</i>    | 1.8 | 2.5E-02 | 0.09 | 6.6E-01 | <i>SLC25A2</i>  | -1.5 | 3.6E-02 | 0.01  | 9.8E-01 |
| <i>COTL1</i>    | 1.8 | 1.1E-02 | 0.12 | 5.4E-01 | <i>ZDHHC19</i>  | -1.5 | 3.1E-02 | 0.12  | 7.1E-01 |

|                  |     |         |      |         |                   |      |         |       |         |
|------------------|-----|---------|------|---------|-------------------|------|---------|-------|---------|
| <i>LLGL2</i>     | 1.8 | 1.5E-02 | 0.51 | 1.6E-02 | <i>PCDH1</i>      | -1.5 | 4.2E-02 | -0.31 | 3.0E-01 |
| <i>PIGP</i>      | 1.8 | 4.4E-02 | 0.12 | 5.6E-01 | <i>MAL2</i>       | -1.5 | 4.3E-02 | -0.16 | 6.2E-01 |
| <i>SARAF</i>     | 1.8 | 1.4E-02 | 0.31 | 1.4E-01 | <i>SCG3</i>       | -1.5 | 2.7E-02 | -0.26 | 3.8E-01 |
| <i>MPZL1</i>     | 1.8 | 1.0E-02 | 0.36 | 9.0E-02 | <i>APLP2</i>      | -1.5 | 2.8E-03 | 0.10  | 7.8E-01 |
| <i>PRKAA1</i>    | 1.8 | 4.6E-02 | 0.33 | 1.2E-01 | <i>PGRMC2</i>     | -1.5 | 2.6E-04 | -0.28 | 3.4E-01 |
| <i>DSCR3</i>     | 1.8 | 2.5E-02 | 0.30 | 1.5E-01 | <i>ABHD14B</i>    | -1.5 | 2.0E-02 | -0.07 | 8.4E-01 |
| <i>CCNY</i>      | 1.8 | 7.2E-03 | 0.37 | 8.2E-02 | <i>MRPL41</i>     | -1.5 | 3.5E-02 | -0.49 | 4.6E-02 |
| <i>ZSWIM8</i>    | 1.8 | 1.9E-02 | 0.16 | 4.3E-01 | <i>OTUD7B</i>     | -1.5 | 2.3E-02 | 0.02  | 9.7E-01 |
| <i>CAPN12</i>    | 1.8 | 1.5E-02 | 0.33 | 1.2E-01 | <i>KDM4A</i>      | -1.5 | 4.1E-03 | 0.14  | 6.8E-01 |
| <i>GTF2H1</i>    | 1.8 | 1.0E-02 | 0.32 | 1.3E-01 | <i>IL17C</i>      | -1.5 | 3.9E-02 | 0.17  | 5.9E-01 |
| <i>SELENOM</i>   | 1.8 | 4.0E-02 | 0.02 | 9.3E-01 | <i>NDUFS1</i>     | -1.5 | 1.9E-02 | 0.07  | 8.4E-01 |
| <i>CGGBP1</i>    | 1.8 | 2.2E-02 | 0.31 | 1.5E-01 | <i>ANKDD1B</i>    | -1.5 | 4.2E-02 | 0.20  | 5.2E-01 |
| <i>SLC35A2</i>   | 1.8 | 9.9E-03 | 0.15 | 4.6E-01 | <i>PUF60</i>      | -1.5 | 2.5E-02 | -0.17 | 5.9E-01 |
| <i>CLPTM1L</i>   | 1.8 | 9.7E-03 | 0.24 | 2.4E-01 | <i>DLST</i>       | -1.5 | 1.0E-02 | 0.02  | 9.7E-01 |
| <i>BDH2</i>      | 1.8 | 3.2E-02 | 0.43 | 4.6E-02 | <i>TCEAL5</i>     | -1.5 | 3.5E-02 | 0.01  | 9.7E-01 |
| <i>DPY30</i>     | 1.8 | 2.6E-02 | 0.27 | 1.8E-01 | <i>GPRASP2</i>    | -1.5 | 2.5E-02 | -0.19 | 5.3E-01 |
| <i>SRPRA</i>     | 1.8 | 3.0E-02 | 0.32 | 1.3E-01 | <i>FBXW5</i>      | -1.5 | 9.2E-03 | -0.29 | 3.3E-01 |
| <i>CHKA</i>      | 1.8 | 1.9E-02 | 0.62 | 2.9E-03 | <i>STAB1</i>      | -1.5 | 3.1E-02 | -0.15 | 6.6E-01 |
| <i>ABCG1</i>     | 1.8 | 3.1E-02 | 0.32 | 1.3E-01 | <i>SCAF1</i>      | -1.5 | 1.8E-03 | 0.08  | 8.2E-01 |
| <i>LASP1</i>     | 1.8 | 1.0E-02 | 0.61 | 3.0E-03 | <i>AFG3L2</i>     | -1.5 | 5.9E-03 | 0.14  | 6.8E-01 |
| <i>EIF4E3</i>    | 1.8 | 3.0E-02 | 0.67 | 1.1E-03 | <i>IQCC</i>       | -1.5 | 2.5E-02 | -0.18 | 5.7E-01 |
| <i>SEC16B</i>    | 1.8 | 2.7E-02 | 0.22 | 2.7E-01 | <i>HSDL2</i>      | -1.5 | 1.0E-02 | 0.06  | 8.8E-01 |
| <i>RBPM5</i>     | 1.8 | 3.1E-02 | 0.19 | 3.6E-01 | <i>MFSD4B</i>     | -1.5 | 3.5E-02 | -0.07 | 8.4E-01 |
| <i>NAIP</i>      | 1.8 | 1.8E-02 | 0.31 | 1.3E-01 | <i>SNX7</i>       | -1.5 | 1.2E-02 | -0.31 | 2.8E-01 |
| <i>RIN3</i>      | 1.8 | 5.1E-03 | 0.39 | 6.8E-02 | <i>GAREM1</i>     | -1.5 | 3.6E-02 | 0.49  | 4.9E-02 |
| <i>HNRNPH3</i>   | 1.8 | 4.7E-02 | 0.28 | 1.8E-01 | <i>CLDN8</i>      | -1.5 | 3.0E-02 | -0.64 | 6.6E-03 |
| <i>NOTCH1</i>    | 1.8 | 2.3E-02 | 0.38 | 7.4E-02 | <i>LIAS</i>       | -1.5 | 1.6E-02 | 0.01  | 9.7E-01 |
| <i>RNPS1</i>     | 1.8 | 3.2E-02 | 0.28 | 1.7E-01 | <i>GSTO2</i>      | -1.5 | 1.6E-02 | -0.30 | 3.0E-01 |
| <i>C9orf152</i>  | 1.8 | 2.3E-02 | 0.04 | 8.7E-01 | <i>NFKBIL1</i>    | -1.5 | 5.0E-04 | 0.20  | 5.2E-01 |
| <i>EIF4A3</i>    | 1.8 | 8.3E-03 | 0.29 | 1.6E-01 | <i>AC002310.4</i> | -1.5 | 3.8E-02 | 0.06  | 8.8E-01 |
| <i>SLC35D2</i>   | 1.8 | 1.7E-02 | 0.42 | 4.9E-02 | <i>IMMT</i>       | -1.5 | 1.1E-03 | 0.14  | 6.6E-01 |
| <i>CD164</i>     | 1.8 | 2.2E-02 | 0.27 | 1.9E-01 | <i>TIMM22</i>     | -1.5 | 3.2E-02 | -0.01 | 9.8E-01 |
| <i>MS4A6A</i>    | 1.8 | 3.7E-03 | 0.39 | 6.8E-02 | <i>CDS1</i>       | -1.5 | 3.4E-02 | 0.15  | 6.4E-01 |
| <i>PSMA2</i>     | 1.8 | 1.9E-02 | 0.19 | 3.6E-01 | <i>PGPEP1</i>     | -1.5 | 1.5E-02 | -0.09 | 8.1E-01 |
| <i>ABAT</i>      | 1.8 | 4.6E-02 | 0.72 | 4.3E-04 | <i>BRF1</i>       | -1.5 | 1.7E-03 | -0.11 | 7.5E-01 |
| <i>TWSG1</i>     | 1.8 | 4.3E-02 | 0.07 | 7.4E-01 | <i>COX4I1</i>     | -1.5 | 3.7E-03 | -0.54 | 2.5E-02 |
| <i>MGST2</i>     | 1.7 | 2.3E-02 | 0.03 | 9.0E-01 | <i>RXRA</i>       | -1.5 | 1.5E-03 | 0.24  | 4.2E-01 |
| <i>CEACAM1</i>   | 1.7 | 9.8E-03 | 0.65 | 1.5E-03 | <i>DNASE1L2</i>   | -1.5 | 1.2E-02 | 0.17  | 5.9E-01 |
| <i>MTX3</i>      | 1.7 | 1.2E-02 | 0.28 | 1.8E-01 | <i>AL591806.3</i> | -1.5 | 4.7E-02 | 0.17  | 5.9E-01 |
| <i>SOCS1</i>     | 1.7 | 3.4E-02 | 0.29 | 1.6E-01 | <i>HSD11B1L</i>   | -1.5 | 1.6E-02 | 0.09  | 8.1E-01 |
| <i>COMMD2</i>    | 1.7 | 5.0E-02 | 0.30 | 1.5E-01 | <i>NPIP12</i>     | -1.5 | 2.9E-02 | 0.09  | 8.0E-01 |
| <i>B3GALNT2</i>  | 1.7 | 4.1E-02 | 0.18 | 3.6E-01 | <i>GPR37L1</i>    | -1.5 | 3.7E-02 | 0.25  | 4.1E-01 |
| <i>GABARAPL2</i> | 1.7 | 2.8E-02 | 0.29 | 1.6E-01 | <i>CNPPD1</i>     | -1.5 | 1.1E-02 | 0.01  | 9.8E-01 |
| <i>PSMD9</i>     | 1.7 | 3.8E-02 | 0.28 | 1.8E-01 | <i>AMELX</i>      | -1.5 | 4.8E-02 | -0.04 | 9.1E-01 |



|                 |     |         |       |         |                  |      |         |       |         |
|-----------------|-----|---------|-------|---------|------------------|------|---------|-------|---------|
| <i>PDZRN3</i>   | 1.7 | 3.3E-02 | 0.06  | 7.7E-01 | <i>PYGO2</i>     | -1.5 | 2.7E-02 | -0.15 | 6.5E-01 |
| <i>CNOT8</i>    | 1.7 | 3.5E-02 | 0.33  | 1.2E-01 | <i>UQCRC2</i>    | -1.5 | 7.0E-03 | -0.36 | 2.0E-01 |
| <i>M6PR</i>     | 1.7 | 2.4E-02 | 0.30  | 1.5E-01 | <i>PDE5A</i>     | -1.5 | 3.9E-02 | 0.46  | 6.9E-02 |
| <i>USMG5</i>    | 1.7 | 4.2E-02 | 0.14  | 5.0E-01 | <i>TJP3</i>      | -1.5 | 3.8E-02 | 0.08  | 8.4E-01 |
| <i>GOLM1</i>    | 1.7 | 1.3E-02 | 0.49  | 2.2E-02 | <i>MINPP1</i>    | -1.5 | 2.0E-02 | 0.32  | 2.8E-01 |
| <i>HLA-DPB1</i> | 1.7 | 1.7E-02 | 0.20  | 3.2E-01 | <i>TMEM8B</i>    | -1.5 | 2.5E-03 | -0.04 | 9.3E-01 |
| <i>ALOX5AP</i>  | 1.7 | 3.4E-02 | 0.49  | 2.0E-02 | <i>UEVLD</i>     | -1.5 | 4.4E-02 | 0.17  | 5.8E-01 |
| <i>PHF10</i>    | 1.7 | 1.5E-02 | 0.39  | 6.4E-02 | <i>PHLDB1</i>    | -1.5 | 7.9E-03 | 0.30  | 3.0E-01 |
| <i>ATP5C1</i>   | 1.7 | 4.4E-02 | 0.22  | 2.7E-01 | <i>DLL4</i>      | -1.5 | 1.6E-02 | 0.00  | 9.9E-01 |
| <i>RPS29</i>    | 1.7 | 1.9E-02 | 0.03  | 8.7E-01 | <i>MEGF8</i>     | -1.5 | 1.6E-03 | 0.46  | 6.6E-02 |
| <i>MCL1</i>     | 1.7 | 3.8E-03 | 0.42  | 4.8E-02 | <i>PLEKHA6</i>   | -1.5 | 4.0E-02 | 0.06  | 8.7E-01 |
| <i>EXOC3L2</i>  | 1.7 | 2.8E-02 | 0.54  | 1.1E-02 | <i>RILP</i>      | -1.5 | 4.0E-02 | -0.07 | 8.4E-01 |
| <i>SMAD4</i>    | 1.7 | 4.1E-02 | 0.27  | 1.8E-01 | <i>OR6F1</i>     | -1.6 | 1.3E-02 | -0.03 | 9.5E-01 |
| <i>TMEM59</i>   | 1.7 | 3.2E-02 | 0.26  | 2.0E-01 | <i>GFER</i>      | -1.6 | 1.7E-02 | -0.22 | 4.9E-01 |
| <i>RRNAD1</i>   | 1.7 | 1.9E-02 | 0.42  | 4.8E-02 | <i>ANKRD40</i>   | -1.6 | 4.1E-02 | 0.21  | 4.9E-01 |
| <i>CCNG2</i>    | 1.7 | 4.3E-02 | 0.32  | 1.3E-01 | <i>FGF9</i>      | -1.6 | 3.1E-02 | 0.00  | 1.0E+00 |
| <i>IL1R1</i>    | 1.7 | 3.1E-02 | 0.40  | 5.7E-02 | <i>PDLIM1</i>    | -1.6 | 4.0E-03 | -0.01 | 9.7E-01 |
| <i>NOA1</i>     | 1.7 | 3.8E-02 | 0.43  | 4.3E-02 | <i>ECH1</i>      | -1.6 | 1.0E-03 | -0.28 | 3.5E-01 |
| <i>PIGG</i>     | 1.7 | 4.1E-02 | 0.44  | 4.1E-02 | <i>SLC22A23</i>  | -1.6 | 3.4E-02 | -0.26 | 3.8E-01 |
| <i>MEF2D</i>    | 1.7 | 3.5E-02 | 0.20  | 3.3E-01 | <i>EC11</i>      | -1.6 | 5.3E-03 | -0.04 | 9.1E-01 |
| <i>RPS7</i>     | 1.7 | 2.3E-02 | 0.03  | 8.8E-01 | <i>NOLAL</i>     | -1.6 | 5.5E-04 | 0.17  | 5.9E-01 |
| <i>ATRAID</i>   | 1.7 | 2.7E-02 | 0.28  | 1.7E-01 | <i>CMTM4</i>     | -1.6 | 1.9E-02 | -0.22 | 4.7E-01 |
| <i>ATP2C1</i>   | 1.7 | 2.4E-02 | 0.06  | 7.7E-01 | <i>RETREG2</i>   | -1.6 | 8.9E-04 | -0.05 | 9.0E-01 |
| <i>PTPN9</i>    | 1.7 | 2.7E-02 | 0.46  | 3.1E-02 | <i>MOB2</i>      | -1.6 | 2.2E-02 | -0.07 | 8.5E-01 |
| <i>CRLS1</i>    | 1.7 | 1.5E-02 | 0.24  | 2.3E-01 | <i>C10orf143</i> | -1.6 | 3.8E-02 | 0.19  | 5.3E-01 |
| <i>SAR1B</i>    | 1.7 | 1.7E-02 | 0.36  | 9.1E-02 | <i>TMEM9B</i>    | -1.6 | 3.0E-02 | -0.61 | 9.9E-03 |
| <i>AXIN1</i>    | 1.7 | 4.6E-02 | 0.24  | 2.4E-01 | <i>ZNF354B</i>   | -1.6 | 4.9E-02 | 0.26  | 3.8E-01 |
| <i>RPL19</i>    | 1.7 | 8.5E-03 | 0.03  | 9.0E-01 | <i>HECTD3</i>    | -1.6 | 9.8E-03 | -0.29 | 3.2E-01 |
| <i>PGM5</i>     | 1.7 | 4.7E-02 | 0.47  | 2.7E-02 | <i>43526</i>     | -1.6 | 3.3E-02 | -0.04 | 9.2E-01 |
| <i>MYL12A</i>   | 1.7 | 2.7E-02 | 0.36  | 9.1E-02 | <i>UNC5B</i>     | -1.6 | 3.4E-02 | 0.21  | 4.9E-01 |
| <i>SLCO2B1</i>  | 1.7 | 2.2E-02 | 0.45  | 3.5E-02 | <i>GNG12</i>     | -1.6 | 1.3E-02 | 0.52  | 3.2E-02 |
| <i>CMC2</i>     | 1.7 | 3.3E-02 | 0.51  | 1.5E-02 | <i>C19orf33</i>  | -1.6 | 3.3E-02 | -0.33 | 2.4E-01 |
| <i>MRPL11</i>   | 1.7 | 3.1E-02 | 0.06  | 7.8E-01 | <i>COX5B</i>     | -1.6 | 1.9E-02 | 0.01  | 9.8E-01 |
| <i>ARRDC2</i>   | 1.7 | 3.1E-02 | 0.31  | 1.5E-01 | <i>SLC35F2</i>   | -1.6 | 1.9E-02 | -0.08 | 8.3E-01 |
| <i>RPL7</i>     | 1.7 | 1.0E-02 | 0.15  | 4.7E-01 | <i>ACBD4</i>     | -1.6 | 2.7E-02 | 0.21  | 4.9E-01 |
| <i>HLA-DRA</i>  | 1.7 | 7.1E-03 | 0.33  | 1.2E-01 | <i>ZNF850</i>    | -1.6 | 5.5E-04 | 0.12  | 7.3E-01 |
| <i>EFTUD2</i>   | 1.7 | 1.9E-02 | 0.31  | 1.4E-01 | <i>FBXO48</i>    | -1.6 | 3.9E-02 | 0.09  | 8.0E-01 |
| <i>NSMF</i>     | 1.6 | 2.7E-02 | 0.32  | 1.3E-01 | <i>SPSB3</i>     | -1.6 | 3.3E-03 | -0.13 | 6.9E-01 |
| <i>NCKAP1</i>   | 1.6 | 2.7E-02 | 0.32  | 1.3E-01 | <i>GBA2</i>      | -1.6 | 2.9E-02 | -0.41 | 1.2E-01 |
| <i>PPP6R2</i>   | 1.6 | 1.7E-02 | -0.17 | 3.9E-01 | <i>FAM218A</i>   | -1.6 | 3.5E-02 | 0.08  | 8.3E-01 |
| <i>SLC44A1</i>  | 1.6 | 2.2E-02 | 0.28  | 1.8E-01 | <i>SYNPO</i>     | -1.6 | 3.0E-03 | 0.34  | 2.4E-01 |
| <i>HDAC5</i>    | 1.6 | 3.3E-02 | 0.22  | 2.7E-01 | <i>MAPK13</i>    | -1.6 | 4.7E-02 | -0.43 | 9.7E-02 |
| <i>ZNF227</i>   | 1.6 | 3.7E-02 | 0.28  | 1.8E-01 | <i>IMPA2</i>     | -1.6 | 1.7E-02 | 0.16  | 6.2E-01 |
| <i>UBE2Q1</i>   | 1.6 | 2.0E-02 | 0.35  | 9.6E-02 | <i>ETFB</i>      | -1.6 | 3.1E-02 | -0.27 | 3.6E-01 |

|                 |     |         |       |         |                 |      |         |       |         |
|-----------------|-----|---------|-------|---------|-----------------|------|---------|-------|---------|
| <i>RNF138</i>   | 1.6 | 3.8E-02 | -0.12 | 5.7E-01 | <i>RTL8A</i>    | -1.6 | 1.7E-02 | -0.14 | 6.7E-01 |
| <i>CD209</i>    | 1.6 | 3.3E-02 | 0.77  | 4.5E-05 | <i>FAM71E1</i>  | -1.6 | 2.6E-02 | -0.08 | 8.3E-01 |
| <i>SCARB2</i>   | 1.6 | 2.7E-02 | 0.52  | 1.5E-02 | <i>TPRG1L</i>   | -1.6 | 4.5E-04 | -0.16 | 6.2E-01 |
| <i>UBE2L6</i>   | 1.6 | 2.3E-02 | 0.61  | 3.1E-03 | <i>DHRS1</i>    | -1.6 | 6.8E-03 | -0.22 | 4.9E-01 |
| <i>TRIOBP</i>   | 1.6 | 3.3E-02 | 0.38  | 7.7E-02 | <i>ZKSCAN1</i>  | -1.6 | 1.1E-02 | -0.20 | 5.2E-01 |
| <i>43710</i>    | 1.6 | 2.8E-02 | 0.42  | 4.8E-02 | <i>VSIG10</i>   | -1.6 | 3.4E-02 | 0.20  | 5.2E-01 |
| <i>APPPBP2</i>  | 1.6 | 3.8E-02 | 0.29  | 1.6E-01 | <i>LUZP2</i>    | -1.6 | 7.8E-04 | 0.02  | 9.6E-01 |
| <i>ASH2L</i>    | 1.6 | 4.6E-02 | 0.45  | 3.4E-02 | <i>PMPCA</i>    | -1.6 | 5.6E-03 | 0.30  | 3.0E-01 |
| <i>BICRA</i>    | 1.6 | 2.8E-02 | 0.55  | 1.1E-02 | <i>FBXL15</i>   | -1.6 | 2.7E-02 | 0.10  | 7.8E-01 |
| <i>FYTTD1</i>   | 1.6 | 2.7E-02 | 0.38  | 7.0E-02 | <i>PSKH1</i>    | -1.6 | 2.8E-02 | -0.40 | 1.3E-01 |
| <i>TMEM41B</i>  | 1.6 | 1.9E-02 | 0.39  | 6.5E-02 | <i>LRRC57</i>   | -1.6 | 2.6E-02 | -0.04 | 9.2E-01 |
| <i>CDC42EP4</i> | 1.6 | 4.7E-02 | 0.41  | 5.4E-02 | <i>ZNF768</i>   | -1.6 | 1.9E-02 | 0.00  | 9.9E-01 |
| <i>SPARC</i>    | 1.6 | 3.2E-02 | 0.49  | 2.2E-02 | <i>SLC10A5</i>  | -1.6 | 2.1E-02 | -0.26 | 3.9E-01 |
| <i>LARP4B</i>   | 1.6 | 2.5E-02 | 0.28  | 1.8E-01 | <i>LANCL3</i>   | -1.6 | 5.2E-03 | 0.09  | 8.1E-01 |
| <i>THBD</i>     | 1.6 | 2.2E-02 | 0.43  | 4.2E-02 | <i>USH1C</i>    | -1.6 | 3.3E-02 | -0.03 | 9.3E-01 |
| <i>LRRC41</i>   | 1.6 | 2.8E-02 | 0.40  | 6.2E-02 | <i>SPON1</i>    | -1.6 | 4.6E-02 | -0.43 | 1.0E-01 |
| <i>C1GALT1</i>  | 1.6 | 2.4E-02 | 0.39  | 6.3E-02 | <i>TRIM45</i>   | -1.6 | 3.8E-02 | -0.16 | 6.2E-01 |
| <i>FGGY</i>     | 1.6 | 2.7E-02 | 0.24  | 2.3E-01 | <i>SCAP</i>     | -1.6 | 1.1E-02 | -0.14 | 6.8E-01 |
| <i>ESS2</i>     | 1.6 | 3.8E-02 | 0.22  | 2.8E-01 | <i>ABHD17C</i>  | -1.6 | 2.1E-02 | 0.06  | 8.7E-01 |
| <i>BAHD1</i>    | 1.6 | 3.7E-02 | 0.54  | 1.1E-02 | <i>KCNE2</i>    | -1.6 | 6.6E-03 | -0.08 | 8.4E-01 |
| <i>AP3S1</i>    | 1.6 | 4.6E-02 | 0.59  | 4.1E-03 | <i>CAT</i>      | -1.6 | 3.9E-04 | 0.48  | 5.3E-02 |
| <i>KHDC4</i>    | 1.6 | 3.8E-02 | 0.49  | 2.1E-02 | <i>KIAA1671</i> | -1.6 | 3.3E-03 | 0.27  | 3.6E-01 |
| <i>PPP1R2</i>   | 1.6 | 5.0E-02 | 0.16  | 4.3E-01 | <i>SRGAP1</i>   | -1.6 | 9.2E-03 | -0.40 | 1.4E-01 |
| <i>ARRDC1</i>   | 1.6 | 3.1E-02 | 0.31  | 1.4E-01 | <i>HSD17B11</i> | -1.6 | 4.2E-03 | -0.08 | 8.3E-01 |
| <i>MAPRE1</i>   | 1.6 | 3.6E-02 | 0.16  | 4.2E-01 | <i>PGM1</i>     | -1.6 | 1.3E-02 | 0.19  | 5.4E-01 |
| <i>EIF4A2</i>   | 1.6 | 2.7E-02 | 0.15  | 4.7E-01 | <i>PANK3</i>    | -1.6 | 3.3E-02 | 0.54  | 2.5E-02 |
| <i>FTL</i>      | 1.6 | 3.1E-02 | 0.50  | 2.0E-02 | <i>NR1H3</i>    | -1.6 | 3.5E-02 | 0.20  | 5.2E-01 |
| <i>INF2</i>     | 1.6 | 1.0E-02 | 0.48  | 2.3E-02 | <i>TFRC</i>     | -1.6 | 4.6E-02 | 0.29  | 3.2E-01 |
| <i>ADGRE5</i>   | 1.6 | 4.0E-02 | 0.14  | 5.1E-01 | <i>ZBED1</i>    | -1.6 | 2.6E-03 | 0.26  | 3.9E-01 |
| <i>KDM1A</i>    | 1.6 | 4.9E-02 | 0.35  | 9.6E-02 | <i>PET117</i>   | -1.6 | 1.1E-02 | 0.09  | 8.1E-01 |
| <i>AZIN1</i>    | 1.6 | 4.4E-02 | 0.39  | 6.6E-02 | <i>NME7</i>     | -1.6 | 2.2E-02 | -0.27 | 3.6E-01 |
| <i>UQCRH</i>    | 1.6 | 4.8E-02 | -0.01 | 9.7E-01 | <i>FOXN3</i>    | -1.6 | 9.5E-03 | 0.11  | 7.4E-01 |
| <i>ARNT</i>     | 1.6 | 5.0E-02 | 0.34  | 1.1E-01 | <i>NDUFA10</i>  | -1.6 | 2.1E-02 | 0.16  | 6.1E-01 |
| <i>ABR</i>      | 1.5 | 2.9E-02 | 0.25  | 2.1E-01 | <i>MUL1</i>     | -1.6 | 2.7E-02 | -0.10 | 7.8E-01 |
| <i>BCAR1</i>    | 1.5 | 4.3E-02 | -0.04 | 8.6E-01 | <i>TRAK2</i>    | -1.6 | 2.1E-03 | -0.01 | 9.8E-01 |
| <i>GHITM</i>    | 1.5 | 3.7E-02 | 0.43  | 4.4E-02 | <i>MAPK3</i>    | -1.6 | 3.5E-03 | 0.09  | 8.1E-01 |
| <i>NAGA</i>     | 1.5 | 3.1E-02 | 0.06  | 7.9E-01 | <i>SSUH2</i>    | -1.6 | 4.7E-02 | -0.24 | 4.2E-01 |
| <i>TM7SF3</i>   | 1.5 | 1.5E-02 | 0.14  | 5.0E-01 | <i>MT-CYB</i>   | -1.6 | 2.4E-02 | -0.41 | 1.2E-01 |
| <i>HNRNPA3</i>  | 1.5 | 4.2E-02 | 0.30  | 1.6E-01 | <i>PLPP1</i>    | -1.6 | 3.3E-02 | 0.53  | 2.7E-02 |
| <i>RPL38</i>    | 1.5 | 4.3E-03 | 0.23  | 2.6E-01 | <i>DAB2IP</i>   | -1.6 | 2.1E-02 | 0.41  | 1.2E-01 |
| <i>HMGNI</i>    | 1.5 | 1.6E-02 | 0.05  | 8.0E-01 | <i>RAD52</i>    | -1.6 | 4.0E-02 | -0.07 | 8.4E-01 |
| <i>PSMA1</i>    | 1.5 | 7.0E-03 | 0.29  | 1.6E-01 | <i>TDRD10</i>   | -1.6 | 2.2E-02 | -0.10 | 7.9E-01 |
| <i>RNF13</i>    | 1.5 | 1.9E-02 | 0.23  | 2.6E-01 | <i>THRA</i>     | -1.6 | 9.0E-04 | 0.31  | 3.0E-01 |
| <i>VCP1P1</i>   | 1.5 | 1.4E-02 | 0.21  | 3.1E-01 | <i>PRSS36</i>   | -1.6 | 1.3E-02 | -0.13 | 6.9E-01 |

|                 |      |         |       |         |                   |      |         |       |         |
|-----------------|------|---------|-------|---------|-------------------|------|---------|-------|---------|
| <i>MYRF</i>     | 1.5  | 8.0E-03 | 0.41  | 5.2E-02 | <i>DNAJC27</i>    | -1.6 | 1.8E-02 | -0.17 | 5.9E-01 |
| <i>YTHDF1</i>   | 1.5  | 4.9E-02 | 0.05  | 8.2E-01 | <i>GP2</i>        | -1.6 | 1.8E-03 | -0.28 | 3.3E-01 |
| <i>SPINT1</i>   | 1.5  | 2.3E-02 | 0.26  | 2.0E-01 | <i>GALNT12</i>    | -1.6 | 6.5E-03 | 0.05  | 9.0E-01 |
| <i>SPTSSA</i>   | 1.5  | 4.0E-02 | 0.18  | 3.8E-01 | <i>GNMT</i>       | -1.6 | 3.8E-02 | 0.01  | 9.8E-01 |
| <i>SRSF7</i>    | 1.5  | 5.0E-02 | 0.00  | 9.8E-01 | <i>RAD9A</i>      | -1.6 | 4.8E-03 | -0.05 | 9.0E-01 |
| <i>PFDN2</i>    | 1.5  | 4.4E-02 | 0.17  | 4.1E-01 | <i>GRB7</i>       | -1.6 | 2.9E-02 | 0.26  | 3.8E-01 |
| <i>GLS</i>      | 1.5  | 3.2E-02 | 0.38  | 7.4E-02 | <i>AAMDC</i>      | -1.6 | 4.6E-02 | -0.22 | 4.6E-01 |
| <i>ERGIC1</i>   | 1.5  | 3.9E-02 | 0.32  | 1.3E-01 | <i>LNPBK</i>      | -1.6 | 8.8E-03 | 0.18  | 5.7E-01 |
| <i>SLC35A1</i>  | 1.5  | 3.1E-02 | 0.09  | 6.5E-01 | <i>SLC25A20</i>   | -1.6 | 3.5E-02 | 0.22  | 4.8E-01 |
| <i>KRT18</i>    | -1.5 | 3.2E-02 | -0.51 | 1.7E-02 | <i>SCNN1A</i>     | -1.6 | 3.8E-02 | -0.06 | 8.8E-01 |
| <i>NAP1L4</i>   | -1.5 | 4.9E-03 | -0.49 | 2.1E-02 | <i>IQSEC2</i>     | -1.6 | 1.2E-02 | -0.15 | 6.4E-01 |
| <i>NEDD4L</i>   | -1.5 | 3.8E-02 | -0.67 | 1.0E-03 | <i>CLCN2</i>      | -1.6 | 3.8E-02 | -0.01 | 9.8E-01 |
| <i>AFDN</i>     | -1.5 | 1.9E-02 | -0.25 | 2.2E-01 | <i>RITA1</i>      | -1.6 | 3.4E-02 | 0.03  | 9.4E-01 |
| <i>MARVELD2</i> | -1.5 | 3.0E-02 | 0.12  | 5.6E-01 | <i>ABCD3</i>      | -1.6 | 3.7E-02 | 0.53  | 2.8E-02 |
| <i>DCAF8</i>    | -1.5 | 8.4E-03 | -0.26 | 2.0E-01 | <i>SDCBP2</i>     | -1.6 | 3.3E-02 | -0.10 | 7.8E-01 |
| <i>DENND4C</i>  | -1.5 | 4.3E-02 | -0.05 | 8.0E-01 | <i>NUBPL</i>      | -1.6 | 1.6E-02 | -0.36 | 2.1E-01 |
| <i>SRP68</i>    | -1.5 | 4.1E-02 | -0.22 | 2.8E-01 | <i>ATP5I</i>      | -1.7 | 3.8E-02 | -0.32 | 2.8E-01 |
| <i>FUBP3</i>    | -1.5 | 3.1E-02 | -0.36 | 9.1E-02 | <i>DDR1</i>       | -1.7 | 9.5E-03 | -0.07 | 8.4E-01 |
| <i>STT3B</i>    | -1.5 | 2.8E-02 | -0.05 | 8.3E-01 | <i>MLYCD</i>      | -1.7 | 4.0E-04 | -0.08 | 8.3E-01 |
| <i>USP42</i>    | -1.5 | 2.6E-02 | -0.09 | 6.6E-01 | <i>TBC1D3</i>     | -1.7 | 3.9E-02 | 0.00  | 9.9E-01 |
| <i>CHMP3</i>    | -1.5 | 5.4E-03 | -0.41 | 5.5E-02 | <i>CHP1</i>       | -1.7 | 3.2E-03 | 0.53  | 2.8E-02 |
| <i>SCO1</i>     | -1.5 | 2.1E-02 | 0.28  | 1.7E-01 | <i>TIMM13</i>     | -1.7 | 2.6E-02 | -0.29 | 3.2E-01 |
| <i>PPHLN1</i>   | -1.5 | 1.2E-02 | -0.08 | 6.9E-01 | <i>SLC1A7</i>     | -1.7 | 1.6E-04 | 0.41  | 1.2E-01 |
| <i>BRD9</i>     | -1.5 | 2.2E-02 | -0.46 | 3.2E-02 | <i>AUTS2</i>      | -1.7 | 5.1E-03 | -0.09 | 8.1E-01 |
| <i>DYNC1LI2</i> | -1.5 | 2.7E-02 | -0.16 | 4.4E-01 | <i>MSH1</i>       | -1.7 | 7.4E-03 | 0.18  | 5.7E-01 |
| <i>ZNF318</i>   | -1.5 | 4.3E-02 | -0.29 | 1.7E-01 | <i>ANKRD62</i>    | -1.7 | 1.6E-02 | -0.26 | 3.9E-01 |
| <i>SLTM</i>     | -1.5 | 3.8E-02 | -0.40 | 5.7E-02 | <i>GLYCTK</i>     | -1.7 | 4.1E-02 | 0.25  | 4.1E-01 |
| <i>PEAK1</i>    | -1.5 | 2.1E-02 | -0.15 | 4.7E-01 | <i>AC058822.1</i> | -1.7 | 3.2E-02 | -0.02 | 9.7E-01 |
| <i>BTBD7</i>    | -1.5 | 2.9E-02 | -0.31 | 1.4E-01 | <i>MAEL</i>       | -1.7 | 2.8E-02 | 0.25  | 4.0E-01 |
| <i>RAB8A</i>    | -1.5 | 2.3E-02 | -0.28 | 1.8E-01 | <i>COLEC11</i>    | -1.7 | 1.7E-02 | -0.06 | 8.8E-01 |
| <i>OLA1</i>     | -1.5 | 3.3E-02 | -0.37 | 8.3E-02 | <i>UQCRC1</i>     | -1.7 | 5.0E-02 | -0.19 | 5.3E-01 |
| <i>SUGT1</i>    | -1.5 | 3.3E-02 | -0.27 | 1.8E-01 | <i>IQGAP2</i>     | -1.7 | 1.7E-02 | 0.34  | 2.4E-01 |
| <i>SAP30BP</i>  | -1.5 | 1.2E-02 | -0.40 | 5.8E-02 | <i>MYRIP</i>      | -1.7 | 2.4E-02 | -0.19 | 5.4E-01 |
| <i>UBN1</i>     | -1.5 | 8.8E-03 | -0.33 | 1.2E-01 | <i>IDH3G</i>      | -1.7 | 2.1E-02 | -0.25 | 4.0E-01 |
| <i>TLK2</i>     | -1.5 | 8.5E-03 | -0.23 | 2.7E-01 | <i>TMCC3</i>      | -1.7 | 2.2E-02 | 0.26  | 3.9E-01 |
| <i>SRSF11</i>   | -1.5 | 1.3E-02 | -0.55 | 1.1E-02 | <i>HMGCL</i>      | -1.7 | 2.4E-02 | 0.41  | 1.2E-01 |
| <i>PSMC1</i>    | -1.5 | 4.0E-02 | -0.54 | 1.1E-02 | <i>AP3S2</i>      | -1.7 | 1.2E-02 | -0.08 | 8.3E-01 |
| <i>BRCC3</i>    | -1.5 | 3.2E-02 | -0.28 | 1.8E-01 | <i>KCNQ1</i>      | -1.7 | 8.8E-03 | -0.30 | 3.0E-01 |
| <i>ETFB</i>     | -1.5 | 4.7E-02 | -0.27 | 1.9E-01 | <i>TMEM120A</i>   | -1.7 | 4.2E-03 | -0.31 | 2.8E-01 |
| <i>STK39</i>    | -1.5 | 3.9E-02 | 0.18  | 3.8E-01 | <i>RNF223</i>     | -1.7 | 1.9E-02 | 0.03  | 9.3E-01 |
| <i>CALM1</i>    | -1.5 | 1.3E-02 | -0.26 | 2.1E-01 | <i>MAG11</i>      | -1.7 | 5.2E-05 | 0.39  | 1.4E-01 |
| <i>POLR2J3</i>  | -1.5 | 2.2E-02 | -0.10 | 6.1E-01 | <i>NRGN</i>       | -1.7 | 1.9E-02 | 0.27  | 3.7E-01 |
| <i>ZC3H18</i>   | -1.5 | 3.5E-02 | -0.18 | 3.7E-01 | <i>HIGD1A</i>     | -1.7 | 3.1E-02 | 0.00  | 9.9E-01 |
| <i>ZNF326</i>   | -1.6 | 2.6E-02 | -0.29 | 1.6E-01 | <i>CRYBB2</i>     | -1.7 | 2.9E-02 | -0.05 | 8.9E-01 |

|                 |      |         |       |         |                 |      |         |       |         |
|-----------------|------|---------|-------|---------|-----------------|------|---------|-------|---------|
| <i>GOLGA2</i>   | -1.6 | 4.1E-02 | -0.32 | 1.3E-01 | <i>C1orf115</i> | -1.7 | 1.5E-02 | 0.62  | 8.9E-03 |
| <i>CHCHD10</i>  | -1.6 | 2.4E-02 | -0.37 | 8.3E-02 | <i>TMEM82</i>   | -1.7 | 4.1E-02 | -0.13 | 7.1E-01 |
| <i>EIF4E2</i>   | -1.6 | 2.3E-02 | -0.39 | 6.3E-02 | <i>AP1M2</i>    | -1.7 | 4.3E-02 | 0.18  | 5.6E-01 |
| <i>TLN1</i>     | -1.6 | 3.2E-02 | -0.14 | 4.8E-01 | <i>ACKR2</i>    | -1.7 | 2.6E-03 | 0.05  | 9.0E-01 |
| <i>TAF15</i>    | -1.6 | 2.6E-02 | -0.50 | 1.8E-02 | <i>ERBB3</i>    | -1.7 | 2.6E-02 | 0.25  | 3.9E-01 |
| <i>BRD2</i>     | -1.6 | 2.8E-02 | -0.65 | 1.7E-03 | <i>RAB40C</i>   | -1.7 | 2.9E-02 | 0.07  | 8.4E-01 |
| <i>KRIT1</i>    | -1.6 | 5.7E-03 | -0.35 | 1.0E-01 | <i>TMEM63C</i>  | -1.7 | 9.5E-03 | -0.17 | 5.9E-01 |
| <i>TFCP2L1</i>  | -1.6 | 1.5E-02 | -0.67 | 1.0E-03 | <i>DENND4C</i>  | -1.7 | 1.5E-03 | -0.05 | 8.9E-01 |
| <i>ACOT11</i>   | -1.6 | 3.9E-02 | -0.32 | 1.3E-01 | <i>DDT</i>      | -1.7 | 2.5E-04 | -0.20 | 5.2E-01 |
| <i>CHCHD2</i>   | -1.6 | 2.3E-02 | -0.49 | 2.0E-02 | <i>ZDHHC23</i>  | -1.7 | 3.7E-02 | -0.14 | 6.6E-01 |
| <i>ABCF1</i>    | -1.6 | 1.4E-02 | -0.28 | 1.8E-01 | <i>FAM229A</i>  | -1.7 | 2.1E-02 | 0.17  | 5.8E-01 |
| <i>SH3GLB2</i>  | -1.6 | 3.8E-02 | -0.38 | 7.4E-02 | <i>C4orf19</i>  | -1.7 | 3.2E-02 | -0.05 | 9.0E-01 |
| <i>KIAA0141</i> | -1.6 | 4.2E-02 | -0.54 | 1.1E-02 | <i>GKN2</i>     | -1.7 | 4.9E-03 | -0.35 | 2.1E-01 |
| <i>EPM2AIP1</i> | -1.6 | 3.9E-02 | -0.26 | 2.0E-01 | <i>EIF4EBP2</i> | -1.7 | 2.4E-04 | 0.55  | 2.1E-02 |
| <i>SRRM1</i>    | -1.6 | 5.0E-02 | -0.26 | 2.1E-01 | <i>VDR</i>      | -1.7 | 1.5E-02 | -0.69 | 2.9E-03 |
| <i>RNF168</i>   | -1.6 | 4.6E-02 | -0.06 | 7.8E-01 | <i>ENDOD1</i>   | -1.7 | 4.1E-02 | -0.62 | 8.4E-03 |
| <i>CPSF2</i>    | -1.6 | 3.2E-02 | -0.13 | 5.2E-01 | <i>LAMTOR4</i>  | -1.7 | 1.9E-02 | -0.60 | 1.1E-02 |
| <i>SARS</i>     | -1.6 | 3.5E-02 | -0.46 | 3.2E-02 | <i>SERF1B</i>   | -1.7 | 5.6E-03 | -0.02 | 9.7E-01 |
| <i>NOP56</i>    | -1.6 | 2.3E-02 | -0.41 | 5.2E-02 | <i>PRADC1</i>   | -1.7 | 3.3E-02 | -0.19 | 5.3E-01 |
| <i>FBXW7</i>    | -1.6 | 1.2E-02 | -0.30 | 1.6E-01 | <i>ZNF677</i>   | -1.7 | 4.7E-02 | -0.23 | 4.4E-01 |
| <i>NCOR1</i>    | -1.6 | 3.7E-03 | -0.19 | 3.5E-01 | <i>GDE1</i>     | -1.7 | 3.9E-03 | 0.28  | 3.4E-01 |
| <i>ENAH</i>     | -1.6 | 2.0E-02 | -0.48 | 2.3E-02 | <i>FITM1</i>    | -1.7 | 3.3E-02 | -0.29 | 3.2E-01 |
| <i>OS9</i>      | -1.6 | 2.4E-02 | -0.27 | 1.8E-01 | <i>CCDC15</i>   | -1.7 | 3.7E-02 | 0.06  | 8.8E-01 |
| <i>ZCRB1</i>    | -1.6 | 8.1E-03 | -0.05 | 8.0E-01 | <i>COMMD9</i>   | -1.7 | 1.0E-03 | -0.17 | 5.9E-01 |
| <i>TTC1</i>     | -1.6 | 2.2E-02 | -0.35 | 1.0E-01 | <i>SFXN5</i>    | -1.7 | 3.2E-02 | -0.15 | 6.4E-01 |
| <i>CMTM6</i>    | -1.6 | 3.5E-02 | -0.27 | 1.8E-01 | <i>CXorf56</i>  | -1.7 | 2.4E-02 | 0.11  | 7.6E-01 |
| <i>PPIG</i>     | -1.6 | 2.2E-02 | -0.54 | 1.1E-02 | <i>ZNF525</i>   | -1.7 | 1.0E-02 | -0.22 | 4.7E-01 |
| <i>NEMF</i>     | -1.6 | 2.4E-02 | -0.27 | 1.9E-01 | <i>SLC19A1</i>  | -1.7 | 2.5E-03 | -0.21 | 5.0E-01 |
| <i>GGNBP2</i>   | -1.6 | 1.9E-02 | -0.47 | 2.6E-02 | <i>ECHS1</i>    | -1.7 | 6.9E-03 | 0.24  | 4.2E-01 |
| <i>CTR9</i>     | -1.6 | 1.2E-02 | -0.31 | 1.3E-01 | <i>EXD3</i>     | -1.7 | 4.1E-02 | -0.21 | 5.0E-01 |
| <i>FIP1L1</i>   | -1.6 | 2.4E-02 | -0.55 | 9.7E-03 | <i>BMP1</i>     | -1.7 | 2.8E-02 | -0.13 | 7.1E-01 |
| <i>SPOP</i>     | -1.6 | 1.7E-02 | -0.39 | 6.6E-02 | <i>MXI1</i>     | -1.7 | 4.3E-02 | 0.12  | 7.2E-01 |
| <i>BAZ2A</i>    | -1.6 | 1.0E-02 | -0.05 | 8.2E-01 | <i>HDHD3</i>    | -1.7 | 4.0E-02 | 0.47  | 5.8E-02 |
| <i>MCU</i>      | -1.6 | 4.3E-02 | -0.60 | 3.7E-03 | <i>ACO2</i>     | -1.7 | 2.5E-03 | 0.14  | 6.8E-01 |
| <i>TPRKB</i>    | -1.6 | 4.2E-02 | -0.29 | 1.6E-01 | <i>DDAHI</i>    | -1.7 | 6.4E-03 | -0.49 | 5.1E-02 |
| <i>COMMD1</i>   | -1.6 | 2.7E-02 | -0.21 | 2.9E-01 | <i>THG1L</i>    | -1.7 | 8.1E-03 | 0.04  | 9.1E-01 |
| <i>SLU7</i>     | -1.6 | 1.0E-02 | -0.40 | 6.0E-02 | <i>ARL6IP6</i>  | -1.7 | 1.5E-02 | 0.20  | 5.2E-01 |
| <i>SSRP1</i>    | -1.6 | 7.2E-03 | -0.40 | 6.0E-02 | <i>ATP9A</i>    | -1.7 | 5.2E-05 | 0.20  | 5.2E-01 |
| <i>EZR</i>      | -1.6 | 1.9E-02 | -0.20 | 3.3E-01 | <i>PCK2</i>     | -1.7 | 2.0E-02 | 0.11  | 7.6E-01 |
| <i>UBE2E1</i>   | -1.6 | 2.3E-02 | -0.51 | 1.6E-02 | <i>CBSL</i>     | -1.7 | 2.9E-02 | 0.09  | 8.0E-01 |
| <i>CLIP1</i>    | -1.6 | 4.2E-02 | -0.31 | 1.4E-01 | <i>PSMD3</i>    | -1.7 | 2.9E-02 | -0.21 | 5.0E-01 |
| <i>CALCOCO2</i> | -1.6 | 2.4E-02 | -0.32 | 1.2E-01 | <i>NOMO3</i>    | -1.7 | 3.6E-02 | -0.11 | 7.5E-01 |
| <i>NUPR1</i>    | -1.6 | 2.1E-02 | -0.62 | 2.9E-03 | <i>CACFD1</i>   | -1.7 | 1.7E-02 | -0.17 | 5.9E-01 |
| <i>ABHD15</i>   | -1.6 | 9.5E-03 | 0.21  | 3.0E-01 | <i>SUCLG1</i>   | -1.7 | 1.5E-02 | -0.22 | 4.7E-01 |

|                 |      |         |       |         |                 |      |         |       |         |
|-----------------|------|---------|-------|---------|-----------------|------|---------|-------|---------|
| <i>RPN2</i>     | -1.6 | 3.5E-02 | -0.38 | 7.6E-02 | <i>SORBS3</i>   | -1.7 | 4.4E-02 | 0.15  | 6.4E-01 |
| <i>FRG1</i>     | -1.6 | 2.0E-02 | -0.30 | 1.5E-01 | <i>PLXNA2</i>   | -1.7 | 2.3E-02 | 0.12  | 7.3E-01 |
| <i>ZC3H13</i>   | -1.6 | 4.0E-02 | -0.28 | 1.7E-01 | <i>GTPBP6</i>   | -1.7 | 3.6E-02 | -0.09 | 8.1E-01 |
| <i>YKT6</i>     | -1.6 | 2.2E-02 | -0.50 | 1.9E-02 | <i>AVP11</i>    | -1.7 | 9.7E-03 | 0.16  | 6.1E-01 |
| <i>ESF1</i>     | -1.6 | 9.4E-03 | -0.53 | 1.2E-02 | <i>AK3</i>      | -1.7 | 5.5E-04 | 0.24  | 4.2E-01 |
| <i>SRPK2</i>    | -1.6 | 2.4E-02 | -0.15 | 4.5E-01 | <i>CYTLL1</i>   | -1.7 | 1.1E-02 | 0.04  | 9.2E-01 |
| <i>CHD3</i>     | -1.6 | 8.5E-03 | -0.29 | 1.6E-01 | <i>PEX26</i>    | -1.7 | 1.1E-02 | -0.22 | 4.7E-01 |
| <i>ANKS4B</i>   | -1.6 | 3.0E-02 | -0.30 | 1.5E-01 | <i>PIGB</i>     | -1.7 | 3.0E-02 | 0.12  | 7.1E-01 |
| <i>TRPM7</i>    | -1.6 | 1.4E-02 | -0.02 | 9.4E-01 | <i>SFXN1</i>    | -1.7 | 8.2E-03 | 0.51  | 3.8E-02 |
| <i>CTBP2</i>    | -1.6 | 1.2E-02 | -0.32 | 1.3E-01 | <i>NDUFV1</i>   | -1.7 | 2.8E-02 | -0.33 | 2.5E-01 |
| <i>DYNC1I2</i>  | -1.6 | 1.5E-02 | -0.53 | 1.2E-02 | <i>HNF1B</i>    | -1.7 | 3.2E-02 | -0.11 | 7.6E-01 |
| <i>RWDD2B</i>   | -1.6 | 2.8E-02 | -0.12 | 5.7E-01 | <i>LRRN2</i>    | -1.7 | 4.3E-03 | 0.07  | 8.5E-01 |
| <i>RPS12</i>    | -1.6 | 4.2E-02 | -0.69 | 7.3E-04 | <i>METTLL7A</i> | -1.7 | 1.9E-02 | 0.22  | 4.7E-01 |
| <i>NMT1</i>     | -1.6 | 1.9E-02 | -0.44 | 3.8E-02 | <i>RAP1GAP</i>  | -1.7 | 4.7E-02 | -0.17 | 5.9E-01 |
| <i>SLC12A2</i>  | -1.6 | 2.7E-02 | -0.23 | 2.6E-01 | <i>AMN</i>      | -1.7 | 4.7E-02 | 0.02  | 9.6E-01 |
| <i>BRD4</i>     | -1.6 | 1.0E-02 | -0.12 | 5.5E-01 | <i>BDH1</i>     | -1.7 | 4.9E-03 | 0.08  | 8.3E-01 |
| <i>SFMBT1</i>   | -1.6 | 3.1E-02 | -0.29 | 1.6E-01 | <i>MT-CO1</i>   | -1.7 | 5.2E-05 | 0.36  | 2.0E-01 |
| <i>SRRT</i>     | -1.6 | 3.8E-02 | -0.71 | 5.0E-04 | <i>EPB41L1</i>  | -1.7 | 1.6E-02 | -0.07 | 8.6E-01 |
| <i>CEBPZOS</i>  | -1.6 | 8.5E-03 | -0.56 | 8.3E-03 | <i>MICAL3</i>   | -1.7 | 2.5E-02 | 0.23  | 4.4E-01 |
| <i>RETSAT</i>   | -1.6 | 2.2E-02 | -0.39 | 6.5E-02 | <i>MRPS33</i>   | -1.8 | 1.3E-04 | -0.07 | 8.4E-01 |
| <i>DDX46</i>    | -1.6 | 1.1E-02 | -0.56 | 8.5E-03 | <i>GNG4</i>     | -1.8 | 2.6E-02 | -0.28 | 3.5E-01 |
| <i>WDR3</i>     | -1.6 | 7.0E-03 | -0.29 | 1.6E-01 | <i>SLC25A10</i> | -1.8 | 4.3E-02 | 0.01  | 9.7E-01 |
| <i>ROCK2</i>    | -1.6 | 1.9E-02 | -0.13 | 5.3E-01 | <i>ZNF91</i>    | -1.8 | 1.5E-02 | -0.20 | 5.2E-01 |
| <i>DENND5B</i>  | -1.6 | 3.1E-02 | -0.02 | 9.4E-01 | <i>TMEM125</i>  | -1.8 | 2.0E-02 | -0.43 | 1.0E-01 |
| <i>CTNBL1</i>   | -1.6 | 1.4E-02 | -0.29 | 1.6E-01 | <i>PRDX6</i>    | -1.8 | 4.6E-02 | -0.57 | 1.6E-02 |
| <i>HCFC2</i>    | -1.6 | 2.1E-02 | -0.33 | 1.2E-01 | <i>ADGRA3</i>   | -1.8 | 2.9E-02 | -0.06 | 8.7E-01 |
| <i>UQCRB</i>    | -1.6 | 8.5E-03 | -0.64 | 2.2E-03 | <i>ANKMY2</i>   | -1.8 | 9.8E-03 | 0.02  | 9.7E-01 |
| <i>NUBPL</i>    | -1.6 | 3.7E-03 | -0.36 | 9.1E-02 | <i>SPATA18</i>  | -1.8 | 2.5E-03 | -0.05 | 8.9E-01 |
| <i>ZRSR2</i>    | -1.6 | 3.3E-02 | -0.48 | 2.3E-02 | <i>GPX3</i>     | -1.8 | 2.8E-02 | 0.16  | 6.1E-01 |
| <i>PUS7L</i>    | -1.6 | 2.9E-02 | -0.27 | 1.8E-01 | <i>LGALS4</i>   | -1.8 | 1.1E-02 | -0.40 | 1.3E-01 |
| <i>DDX21</i>    | -1.6 | 1.1E-02 | -0.43 | 4.4E-02 | <i>FAM13A</i>   | -1.8 | 5.8E-04 | 0.58  | 1.2E-02 |
| <i>SMARCA4</i>  | -1.6 | 4.2E-02 | -0.42 | 4.7E-02 | <i>ANO9</i>     | -1.8 | 4.4E-02 | -0.06 | 8.6E-01 |
| <i>DDAH1</i>    | -1.7 | 3.6E-02 | -0.49 | 2.3E-02 | <i>KDF1</i>     | -1.8 | 8.3E-03 | -0.05 | 8.9E-01 |
| <i>PARD3</i>    | -1.7 | 1.3E-02 | -0.11 | 6.0E-01 | <i>SRI</i>      | -1.8 | 5.7E-03 | 0.48  | 5.3E-02 |
| <i>NDUFA5</i>   | -1.7 | 9.2E-03 | -0.67 | 1.1E-03 | <i>ABHD11</i>   | -1.8 | 1.1E-02 | -0.33 | 2.4E-01 |
| <i>SETBP1</i>   | -1.7 | 4.3E-02 | -0.05 | 8.1E-01 | <i>LIPC</i>     | -1.8 | 1.1E-03 | -0.14 | 6.8E-01 |
| <i>IGF2BP2</i>  | -1.7 | 1.5E-02 | -0.09 | 6.7E-01 | <i>TMC4</i>     | -1.8 | 1.1E-02 | 0.25  | 4.1E-01 |
| <i>DCAF7</i>    | -1.7 | 3.9E-03 | -0.21 | 3.0E-01 | <i>NMT2</i>     | -1.8 | 2.0E-02 | -0.06 | 8.7E-01 |
| <i>C1orf131</i> | -1.7 | 2.3E-02 | -0.38 | 7.7E-02 | <i>PYGB</i>     | -1.8 | 1.9E-02 | 0.05  | 9.0E-01 |
| <i>ZMAT2</i>    | -1.7 | 1.8E-02 | -0.20 | 3.1E-01 | <i>SPIRE2</i>   | -1.8 | 2.3E-02 | 0.13  | 7.1E-01 |
| <i>URGCP</i>    | -1.7 | 1.2E-02 | -0.29 | 1.7E-01 | <i>TMEM98</i>   | -1.8 | 2.6E-03 | -0.53 | 2.8E-02 |
| <i>PSMD1</i>    | -1.7 | 4.0E-02 | -0.21 | 3.0E-01 | <i>SLC22A18</i> | -1.8 | 2.2E-02 | -0.24 | 4.2E-01 |
| <i>MON1B</i>    | -1.7 | 4.9E-03 | -0.24 | 2.3E-01 | <i>LRP12</i>    | -1.8 | 3.2E-02 | 0.48  | 5.1E-02 |
| <i>NDUFB9</i>   | -1.7 | 6.2E-03 | -0.63 | 2.3E-03 | <i>DTX4</i>     | -1.8 | 1.2E-02 | 0.03  | 9.5E-01 |

|                  |      |         |       |         |                 |      |         |       |         |
|------------------|------|---------|-------|---------|-----------------|------|---------|-------|---------|
| <i>TFG</i>       | -1.7 | 2.1E-03 | -0.37 | 8.3E-02 | <i>MYOT</i>     | -1.8 | 1.3E-02 | -0.35 | 2.2E-01 |
| <i>TPM4</i>      | -1.7 | 1.9E-02 | -0.24 | 2.4E-01 | <i>CPNE2</i>    | -1.8 | 4.0E-03 | 0.41  | 1.2E-01 |
| <i>CHD2</i>      | -1.7 | 3.7E-02 | -0.18 | 3.8E-01 | <i>CHCHD10</i>  | -1.8 | 1.3E-03 | -0.37 | 1.9E-01 |
| <i>TAF11</i>     | -1.7 | 9.0E-03 | -0.51 | 1.7E-02 | <i>GAL3ST4</i>  | -1.8 | 4.0E-02 | -0.53 | 2.9E-02 |
| <i>DR1</i>       | -1.7 | 4.9E-03 | -0.54 | 1.1E-02 | <i>NR2F6</i>    | -1.8 | 3.4E-03 | -0.29 | 3.2E-01 |
| <i>FAM114A1</i>  | -1.7 | 1.9E-02 | -0.16 | 4.2E-01 | <i>PTGR2</i>    | -1.8 | 2.2E-02 | -0.27 | 3.6E-01 |
| <i>PNISR</i>     | -1.7 | 2.9E-02 | -0.46 | 3.2E-02 | <i>GIPC2</i>    | -1.8 | 3.9E-02 | 0.24  | 4.2E-01 |
| <i>DDX24</i>     | -1.7 | 4.2E-03 | -0.15 | 4.6E-01 | <i>ACSS2</i>    | -1.8 | 3.1E-02 | -0.02 | 9.7E-01 |
| <i>CEP41</i>     | -1.7 | 4.9E-02 | -0.31 | 1.4E-01 | <i>PGAP3</i>    | -1.8 | 1.2E-02 | -0.09 | 8.1E-01 |
| <i>ZCCHC6</i>    | -1.7 | 2.4E-02 | -0.18 | 3.9E-01 | <i>EVI5L</i>    | -1.8 | 4.7E-02 | 0.08  | 8.3E-01 |
| <i>RRM1</i>      | -1.7 | 4.2E-02 | -0.39 | 6.5E-02 | <i>SREBF2</i>   | -1.8 | 3.4E-03 | -0.19 | 5.4E-01 |
| <i>HSP90AB1</i>  | -1.7 | 1.4E-02 | -0.26 | 2.0E-01 | <i>RRAS2</i>    | -1.8 | 7.2E-03 | 0.33  | 2.4E-01 |
| <i>TSC22D2</i>   | -1.7 | 1.8E-02 | -0.37 | 7.9E-02 | <i>SUCLG2</i>   | -1.8 | 4.5E-02 | 0.38  | 1.6E-01 |
| <i>PRPF6</i>     | -1.7 | 1.8E-02 | -0.53 | 1.2E-02 | <i>SFN</i>      | -1.8 | 4.1E-02 | -0.11 | 7.6E-01 |
| <i>YLPM1</i>     | -1.7 | 1.2E-02 | -0.35 | 9.8E-02 | <i>CLYBL</i>    | -1.8 | 6.2E-03 | 0.04  | 9.2E-01 |
| <i>PHACTR4</i>   | -1.7 | 1.0E-02 | -0.25 | 2.2E-01 | <i>BAX</i>      | -1.8 | 1.8E-03 | 0.02  | 9.7E-01 |
| <i>VTI1A</i>     | -1.7 | 1.6E-02 | -0.39 | 6.5E-02 | <i>CPE</i>      | -1.8 | 1.9E-02 | -0.20 | 5.2E-01 |
| <i>RTFDC1</i>    | -1.7 | 1.8E-02 | -0.53 | 1.2E-02 | <i>ZNF441</i>   | -1.8 | 2.8E-03 | -0.20 | 5.2E-01 |
| <i>LRRFIP1</i>   | -1.7 | 1.6E-02 | -0.29 | 1.6E-01 | <i>GTF2H2C</i>  | -1.8 | 2.5E-02 | -0.03 | 9.4E-01 |
| <i>SMARCA2</i>   | -1.7 | 2.4E-02 | -0.23 | 2.7E-01 | <i>AGPAT2</i>   | -1.8 | 3.5E-02 | 0.32  | 2.7E-01 |
| <i>LYRM2</i>     | -1.7 | 1.7E-02 | -0.40 | 6.2E-02 | <i>SMPDL3B</i>  | -1.8 | 3.5E-04 | -0.53 | 2.9E-02 |
| <i>HYI</i>       | -1.7 | 3.0E-02 | -0.26 | 2.0E-01 | <i>PTK6</i>     | -1.8 | 3.2E-02 | -0.02 | 9.7E-01 |
| <i>DNASE1</i>    | -1.7 | 4.5E-02 | -0.48 | 2.5E-02 | <i>LMBR1L</i>   | -1.8 | 3.2E-02 | 0.23  | 4.5E-01 |
| <i>PARD3B</i>    | -1.7 | 4.1E-02 | -0.15 | 4.6E-01 | <i>MT-ND1</i>   | -1.8 | 2.5E-03 | -0.13 | 7.1E-01 |
| <i>CHD6</i>      | -1.7 | 4.2E-02 | -0.25 | 2.1E-01 | <i>MIGA2</i>    | -1.8 | 5.0E-04 | 0.26  | 3.8E-01 |
| <i>CNOT11</i>    | -1.7 | 1.7E-02 | -0.59 | 4.5E-03 | <i>MT-ATP6</i>  | -1.8 | 6.9E-03 | -0.50 | 4.5E-02 |
| <i>C5orf63</i>   | -1.7 | 1.9E-02 | -0.10 | 6.1E-01 | <i>EHHADH</i>   | -1.8 | 5.3E-03 | 0.67  | 3.4E-03 |
| <i>DNAJC5</i>    | -1.7 | 8.5E-03 | -0.62 | 2.7E-03 | <i>ARF5</i>     | -1.8 | 4.0E-02 | 0.35  | 2.2E-01 |
| <i>CCDC43</i>    | -1.7 | 4.1E-02 | -0.39 | 6.5E-02 | <i>TRAF3IP2</i> | -1.8 | 9.0E-03 | 0.13  | 7.1E-01 |
| <i>RPL26</i>     | -1.7 | 1.6E-02 | -0.70 | 5.5E-04 | <i>EVPL</i>     | -1.8 | 7.3E-03 | -0.16 | 6.2E-01 |
| <i>POF1B</i>     | -1.7 | 4.2E-02 | -0.43 | 4.3E-02 | <i>SLC25A35</i> | -1.8 | 4.5E-03 | -0.15 | 6.6E-01 |
| <i>PA2G4</i>     | -1.7 | 1.8E-02 | -0.39 | 6.4E-02 | <i>ZNF219</i>   | -1.8 | 3.8E-04 | -0.41 | 1.2E-01 |
| <i>RBM33</i>     | -1.7 | 3.1E-03 | -0.36 | 9.1E-02 | <i>SERINC2</i>  | -1.8 | 7.3E-03 | -0.10 | 7.7E-01 |
| <i>INO80</i>     | -1.7 | 4.2E-03 | -0.30 | 1.5E-01 | <i>C4orf48</i>  | -1.8 | 9.7E-03 | 0.04  | 9.1E-01 |
| <i>MAN1A2</i>    | -1.7 | 3.0E-02 | -0.44 | 3.9E-02 | <i>PLCE1</i>    | -1.8 | 1.9E-02 | -0.07 | 8.5E-01 |
| <i>CEP63</i>     | -1.7 | 3.6E-02 | -0.29 | 1.6E-01 | <i>ANKRD9</i>   | -1.8 | 1.8E-02 | -0.11 | 7.7E-01 |
| <i>STT3A</i>     | -1.7 | 3.4E-02 | -0.29 | 1.7E-01 | <i>ADGRL3</i>   | -1.8 | 7.9E-05 | 0.16  | 6.2E-01 |
| <i>ARHGAP11A</i> | -1.7 | 3.2E-02 | -0.29 | 1.6E-01 | <i>ANO10</i>    | -1.8 | 2.2E-03 | 0.08  | 8.4E-01 |
| <i>KIAA0368</i>  | -1.7 | 4.3E-02 | -0.25 | 2.1E-01 | <i>RAPGEFL1</i> | -1.8 | 1.3E-02 | 0.23  | 4.5E-01 |
| <i>TMEM253</i>   | -1.7 | 2.0E-02 | -0.35 | 9.6E-02 | <i>XK</i>       | -1.8 | 4.0E-02 | 0.52  | 3.3E-02 |
| <i>PSMD7</i>     | -1.7 | 9.8E-03 | -0.46 | 3.0E-02 | <i>FAM234A</i>  | -1.8 | 1.4E-03 | 0.44  | 8.4E-02 |
| <i>LARP7</i>     | -1.7 | 2.7E-02 | -0.44 | 4.1E-02 | <i>MGAT4B</i>   | -1.8 | 1.6E-03 | -0.45 | 8.1E-02 |
| <i>ZNFX1</i>     | -1.7 | 3.2E-02 | -0.43 | 4.2E-02 | <i>CES1</i>     | -1.8 | 4.3E-02 | 0.37  | 1.9E-01 |
| <i>RBBP6</i>     | -1.7 | 1.4E-02 | -0.55 | 9.7E-03 | <i>CYP27A1</i>  | -1.8 | 1.8E-02 | -0.09 | 8.1E-01 |

|                 |      |         |       |         |                |      |         |       |         |
|-----------------|------|---------|-------|---------|----------------|------|---------|-------|---------|
| <i>HNRNPH1</i>  | -1.7 | 3.3E-02 | -0.33 | 1.2E-01 | <i>TLN2</i>    | -1.8 | 6.8E-04 | -0.32 | 2.8E-01 |
| <i>SCAPER</i>   | -1.7 | 3.4E-02 | -0.53 | 1.3E-02 | <i>SLC10A1</i> | -1.8 | 5.1E-03 | -0.01 | 9.8E-01 |
| <i>DSP</i>      | -1.7 | 4.1E-02 | -0.30 | 1.5E-01 | <i>BBIP1</i>   | -1.8 | 2.9E-02 | -0.03 | 9.4E-01 |
| <i>SLC30A9</i>  | -1.7 | 1.4E-02 | -0.52 | 1.5E-02 | <i>MT-ND3</i>  | -1.9 | 2.5E-04 | -0.20 | 5.2E-01 |
| <i>PPCS</i>     | -1.7 | 8.6E-03 | -0.27 | 1.8E-01 | <i>ABCA8</i>   | -1.9 | 1.4E-02 | 0.17  | 5.9E-01 |
| <i>SUPT16H</i>  | -1.7 | 6.2E-03 | -0.37 | 8.4E-02 | <i>SF3A2</i>   | -1.9 | 3.8E-02 | -0.10 | 8.0E-01 |
| <i>NIPBL</i>    | -1.7 | 3.3E-03 | -0.27 | 1.9E-01 | <i>MT-CO3</i>  | -1.9 | 7.6E-03 | 0.02  | 9.6E-01 |
| <i>SLC37A4</i>  | -1.7 | 6.5E-03 | -0.46 | 3.2E-02 | <i>POU5F1B</i> | -1.9 | 1.2E-02 | 0.10  | 7.9E-01 |
| <i>POLE3</i>    | -1.7 | 3.2E-02 | -0.70 | 5.5E-04 | <i>MLXIP</i>   | -1.9 | 7.3E-04 | 0.25  | 4.1E-01 |
| <i>C22orf46</i> | -1.7 | 1.6E-02 | -0.25 | 2.1E-01 | <i>ABHD5</i>   | -1.9 | 2.0E-02 | 0.32  | 2.8E-01 |
| <i>CEP78</i>    | -1.7 | 3.9E-02 | -0.34 | 1.1E-01 | <i>TFCP2L1</i> | -1.9 | 8.8E-03 | -0.67 | 3.4E-03 |
| <i>NASP</i>     | -1.7 | 7.6E-03 | -0.48 | 2.5E-02 | <i>RAVER2</i>  | -1.9 | 1.3E-02 | 0.16  | 6.2E-01 |
| <i>EIF5B</i>    | -1.7 | 4.9E-03 | -0.49 | 2.1E-02 | <i>GSTZ1</i>   | -1.9 | 4.0E-02 | -0.14 | 6.6E-01 |
| <i>KMT2B</i>    | -1.7 | 4.2E-02 | -0.32 | 1.3E-01 | <i>EMILIN3</i> | -1.9 | 2.0E-02 | -0.20 | 5.2E-01 |
| <i>CCDC82</i>   | -1.7 | 2.9E-02 | -0.32 | 1.3E-01 | <i>PHYH</i>    | -1.9 | 4.3E-03 | 0.24  | 4.2E-01 |
| <i>ARL11</i>    | -1.7 | 3.2E-02 | -0.13 | 5.3E-01 | <i>TMEM100</i> | -1.9 | 1.2E-02 | 0.38  | 1.7E-01 |
| <i>ARHGEF3</i>  | -1.7 | 1.1E-02 | -0.51 | 1.5E-02 | <i>FAM183A</i> | -1.9 | 4.0E-02 | -0.06 | 8.7E-01 |
| <i>ACADS</i>    | -1.8 | 3.9E-03 | -0.12 | 5.5E-01 | <i>THAP3</i>   | -1.9 | 2.5E-02 | -0.09 | 8.0E-01 |
| <i>PPP2R2A</i>  | -1.8 | 5.0E-03 | -0.32 | 1.3E-01 | <i>SH2D6</i>   | -1.9 | 4.1E-02 | -0.18 | 5.7E-01 |
| <i>RSRC1</i>    | -1.8 | 9.3E-03 | -0.59 | 4.6E-03 | <i>ACOT11</i>  | -1.9 | 4.7E-04 | -0.32 | 2.7E-01 |
| <i>MYLK</i>     | -1.8 | 2.1E-02 | -0.65 | 1.7E-03 | <i>BSG</i>     | -1.9 | 4.9E-02 | -0.14 | 6.7E-01 |
| <i>MFHAS1</i>   | -1.8 | 1.1E-02 | -0.48 | 2.3E-02 | <i>HOXB5</i>   | -1.9 | 3.9E-02 | 0.56  | 1.9E-02 |
| <i>NRP1</i>     | -1.8 | 4.3E-02 | -0.10 | 6.3E-01 | <i>MT-ND4L</i> | -1.9 | 1.7E-02 | -0.31 | 2.8E-01 |
| <i>MRE11</i>    | -1.8 | 2.5E-02 | -0.31 | 1.4E-01 | <i>FMO5</i>    | -1.9 | 3.4E-02 | -0.04 | 9.2E-01 |
| <i>METAP2</i>   | -1.8 | 4.8E-03 | -0.32 | 1.3E-01 | <i>GNA11</i>   | -1.9 | 1.5E-02 | 0.34  | 2.4E-01 |
| <i>PDE9A</i>    | -1.8 | 4.9E-02 | -0.10 | 6.4E-01 | <i>HSPB1</i>   | -1.9 | 3.6E-02 | 0.59  | 1.2E-02 |
| <i>CTCF</i>     | -1.8 | 1.5E-02 | -0.31 | 1.4E-01 | <i>BCAS1</i>   | -1.9 | 1.9E-02 | -0.55 | 2.3E-02 |
| <i>CDC37</i>    | -1.8 | 1.6E-02 | -0.50 | 2.0E-02 | <i>ODF3L1</i>  | -1.9 | 1.1E-02 | 0.06  | 8.8E-01 |
| <i>AUP1</i>     | -1.8 | 3.5E-02 | -0.73 | 2.8E-04 | <i>ETHE1</i>   | -1.9 | 8.3E-03 | -0.41 | 1.2E-01 |
| <i>PSMD4</i>    | -1.8 | 2.5E-02 | -0.53 | 1.1E-02 | <i>MAST2</i>   | -1.9 | 8.4E-05 | 0.28  | 3.3E-01 |
| <i>DSN1</i>     | -1.8 | 1.8E-02 | -0.26 | 2.0E-01 | <i>PLIN2</i>   | -1.9 | 2.6E-02 | 0.30  | 3.0E-01 |
| <i>CHD7</i>     | -1.8 | 1.6E-02 | -0.22 | 2.9E-01 | <i>NR5A2</i>   | -1.9 | 3.7E-02 | 0.03  | 9.5E-01 |
| <i>LTV1</i>     | -1.8 | 2.7E-02 | -0.33 | 1.2E-01 | <i>CRNN</i>    | -1.9 | 4.2E-02 | 0.29  | 3.2E-01 |
| <i>DGKA</i>     | -1.8 | 4.4E-02 | -0.39 | 6.4E-02 | <i>TTR</i>     | -1.9 | 2.5E-03 | -0.32 | 2.7E-01 |
| <i>PRRC2C</i>   | -1.8 | 2.4E-02 | -0.26 | 2.0E-01 | <i>ABHD15</i>  | -1.9 | 6.2E-04 | 0.21  | 5.0E-01 |
| <i>PNPO</i>     | -1.8 | 1.5E-02 | -0.44 | 4.1E-02 | <i>RAB17</i>   | -1.9 | 2.0E-03 | -0.17 | 5.8E-01 |
| <i>CCNA2</i>    | -1.8 | 1.7E-02 | -0.42 | 4.8E-02 | <i>CAMK2N1</i> | -1.9 | 3.0E-02 | -0.14 | 6.7E-01 |
| <i>ZNF219</i>   | -1.8 | 1.8E-02 | -0.41 | 5.5E-02 | <i>ZNF701</i>  | -1.9 | 1.3E-02 | 0.00  | 1.0E+00 |
| <i>FAM49B</i>   | -1.8 | 3.8E-02 | -0.28 | 1.7E-01 | <i>PRR26</i>   | -1.9 | 3.2E-04 | -0.23 | 4.5E-01 |
| <i>MFAP1</i>    | -1.8 | 3.9E-03 | -0.33 | 1.1E-01 | <i>ANKS4B</i>  | -1.9 | 2.2E-02 | -0.30 | 3.0E-01 |
| <i>CEP170B</i>  | -1.8 | 3.1E-02 | -0.60 | 3.6E-03 | <i>TTC38</i>   | -1.9 | 4.0E-02 | -0.25 | 4.0E-01 |
| <i>FAAP20</i>   | -1.8 | 4.0E-02 | -0.28 | 1.8E-01 | <i>ESPN</i>    | -1.9 | 4.0E-03 | 0.18  | 5.5E-01 |
| <i>EIF6</i>     | -1.8 | 3.3E-02 | -0.44 | 4.0E-02 | <i>CPEB3</i>   | -1.9 | 2.1E-03 | -0.07 | 8.5E-01 |
| <i>PSME2</i>    | -1.8 | 2.2E-02 | -0.35 | 9.3E-02 | <i>FAH</i>     | -1.9 | 1.8E-03 | -0.20 | 5.2E-01 |

|                  |      |         |       |         |                 |      |         |       |         |
|------------------|------|---------|-------|---------|-----------------|------|---------|-------|---------|
| <i>OPA3</i>      | -1.8 | 3.1E-02 | 0.01  | 9.6E-01 | <i>OPLAH</i>    | -1.9 | 2.0E-02 | 0.11  | 7.4E-01 |
| <i>ANKRD36</i>   | -1.8 | 4.0E-02 | -0.28 | 1.8E-01 | <i>SLC9A3R1</i> | -1.9 | 7.5E-04 | 0.24  | 4.3E-01 |
| <i>PSMC6</i>     | -1.8 | 8.1E-03 | -0.14 | 4.8E-01 | <i>MYO1D</i>    | -1.9 | 9.8E-03 | 0.24  | 4.2E-01 |
| <i>TCF25</i>     | -1.8 | 3.0E-03 | -0.32 | 1.2E-01 | <i>DIO3</i>     | -1.9 | 1.2E-02 | -0.58 | 1.3E-02 |
| <i>TNPO1</i>     | -1.8 | 3.3E-03 | -0.34 | 1.0E-01 | <i>CLDN3</i>    | -1.9 | 2.8E-02 | -0.15 | 6.6E-01 |
| <i>MPHOSPH9</i>  | -1.8 | 2.4E-02 | -0.42 | 4.8E-02 | <i>EFNA1</i>    | -1.9 | 2.4E-02 | 0.31  | 2.9E-01 |
| <i>DDX27</i>     | -1.8 | 4.2E-03 | -0.40 | 6.0E-02 | <i>AOC1</i>     | -1.9 | 1.4E-02 | 0.01  | 9.8E-01 |
| <i>RAB11FIP2</i> | -1.8 | 1.9E-02 | -0.26 | 2.0E-01 | <i>MT-ND4</i>   | -1.9 | 3.6E-04 | -0.52 | 3.1E-02 |
| <i>CDK16</i>     | -1.8 | 3.8E-02 | -0.02 | 9.4E-01 | <i>CHDH</i>     | -1.9 | 2.9E-03 | -0.30 | 3.1E-01 |
| <i>DROSHA</i>    | -1.8 | 4.2E-03 | -0.55 | 1.1E-02 | <i>PTGR1</i>    | -1.9 | 1.2E-03 | 0.40  | 1.3E-01 |
| <i>NEU3</i>      | -1.8 | 5.0E-02 | -0.03 | 9.0E-01 | <i>PNPLA2</i>   | -1.9 | 9.4E-04 | -0.08 | 8.3E-01 |
| <i>PPFIBP2</i>   | -1.8 | 1.3E-02 | -0.31 | 1.4E-01 | <i>GPRC5C</i>   | -1.9 | 1.9E-03 | 0.08  | 8.2E-01 |
| <i>HMGB2</i>     | -1.8 | 3.3E-02 | -0.28 | 1.8E-01 | <i>OSBPL1A</i>  | -2.0 | 2.5E-03 | 0.24  | 4.2E-01 |
| <i>KCNQ1</i>     | -1.8 | 1.5E-02 | -0.30 | 1.5E-01 | <i>TSPAN7</i>   | -2.0 | 3.4E-03 | 0.05  | 8.9E-01 |
| <i>PGRMC2</i>    | -1.8 | 6.4E-04 | -0.28 | 1.7E-01 | <i>MARVELD3</i> | -2.0 | 2.4E-03 | 0.39  | 1.5E-01 |
| <i>WSB2</i>      | -1.8 | 2.7E-02 | -0.19 | 3.6E-01 | <i>MGLL</i>     | -2.0 | 2.9E-03 | 0.49  | 4.9E-02 |
| <i>NOP14</i>     | -1.8 | 1.4E-02 | -0.30 | 1.6E-01 | <i>HHLA2</i>    | -2.0 | 2.6E-02 | -0.63 | 7.8E-03 |
| <i>GON4L</i>     | -1.8 | 5.0E-03 | -0.29 | 1.6E-01 | <i>EPHX2</i>    | -2.0 | 6.1E-03 | -0.09 | 8.1E-01 |
| <i>ZNF141</i>    | -1.8 | 3.4E-02 | 0.13  | 5.2E-01 | <i>VIL1</i>     | -2.0 | 2.5E-02 | -0.37 | 1.8E-01 |
| <i>SORD</i>      | -1.8 | 2.6E-02 | -0.32 | 1.3E-01 | <i>CXorf40A</i> | -2.0 | 1.7E-02 | -0.27 | 3.6E-01 |
| <i>WDR60</i>     | -1.8 | 3.0E-02 | -0.42 | 4.8E-02 | <i>TGFA</i>     | -2.0 | 1.5E-03 | 0.06  | 8.7E-01 |
| <i>WDR92</i>     | -1.8 | 2.7E-02 | -0.36 | 8.7E-02 | <i>PDCD4</i>    | -2.0 | 1.4E-02 | -0.05 | 8.9E-01 |
| <i>MEA1</i>      | -1.8 | 2.1E-02 | -0.57 | 6.8E-03 | <i>CPT1A</i>    | -2.0 | 1.3E-03 | 0.36  | 2.1E-01 |
| <i>SPTLC2</i>    | -1.8 | 2.3E-03 | -0.12 | 5.5E-01 | <i>ZNF341</i>   | -2.0 | 7.4E-03 | 0.15  | 6.4E-01 |
| <i>MYO1A</i>     | -1.8 | 4.5E-02 | -0.42 | 4.9E-02 | <i>ARHGAP44</i> | -2.0 | 3.7E-02 | 0.43  | 9.7E-02 |
| <i>RBM25</i>     | -1.8 | 1.7E-02 | -0.43 | 4.4E-02 | <i>ASAP3</i>    | -2.0 | 4.0E-02 | 0.65  | 5.6E-03 |
| <i>PRPF38B</i>   | -1.8 | 1.9E-02 | -0.54 | 1.1E-02 | <i>TSEN2</i>    | -2.0 | 9.1E-05 | -0.01 | 9.8E-01 |
| <i>DDX10</i>     | -1.8 | 4.1E-02 | -0.37 | 8.2E-02 | <i>CDIP1</i>    | -2.0 | 2.6E-02 | 0.24  | 4.2E-01 |
| <i>RPS27A</i>    | -1.8 | 1.7E-02 | -0.72 | 4.3E-04 | <i>ETNK1</i>    | -2.0 | 4.0E-02 | 0.70  | 2.9E-03 |
| <i>LRRC47</i>    | -1.8 | 2.7E-02 | -0.64 | 2.0E-03 | <i>HES5</i>     | -2.0 | 4.5E-02 | -0.18 | 5.7E-01 |
| <i>MMS19</i>     | -1.8 | 4.6E-02 | -0.58 | 5.7E-03 | <i>PXMP2</i>    | -2.0 | 7.4E-03 | 0.19  | 5.3E-01 |
| <i>WWP2</i>      | -1.8 | 4.9E-03 | -0.43 | 4.3E-02 | <i>USP30</i>    | -2.0 | 6.0E-03 | 0.38  | 1.6E-01 |
| <i>SREK1</i>     | -1.8 | 9.2E-03 | -0.45 | 3.6E-02 | <i>UGDH</i>     | -2.0 | 1.9E-02 | 0.10  | 7.7E-01 |
| <i>HSPA5</i>     | -1.8 | 2.7E-02 | -0.28 | 1.7E-01 | <i>PLCD3</i>    | -2.0 | 3.5E-02 | -0.40 | 1.3E-01 |
| <i>DEK</i>       | -1.8 | 8.5E-03 | -0.36 | 8.5E-02 | <i>GRAMD2A</i>  | -2.0 | 4.0E-02 | 0.24  | 4.2E-01 |
| <i>HYPK</i>      | -1.8 | 2.7E-02 | -0.27 | 1.9E-01 | <i>LETM1</i>    | -2.0 | 3.4E-03 | 0.07  | 8.4E-01 |
| <i>43719</i>     | -1.8 | 7.2E-03 | -0.16 | 4.4E-01 | <i>SLC25A42</i> | -2.0 | 4.8E-03 | 0.27  | 3.6E-01 |
| <i>DNASE2</i>    | -1.8 | 3.9E-02 | -0.10 | 6.4E-01 | <i>RNASE1</i>   | -2.0 | 3.2E-02 | -0.29 | 3.2E-01 |
| <i>SNRPD1</i>    | -1.8 | 1.9E-02 | -0.66 | 1.3E-03 | <i>CPT2</i>     | -2.0 | 9.8E-03 | 0.46  | 6.8E-02 |
| <i>JAGN1</i>     | -1.8 | 3.7E-03 | -0.35 | 1.0E-01 | <i>RNF152</i>   | -2.0 | 4.1E-02 | -0.53 | 2.9E-02 |
| <i>CKMT1A</i>    | -1.9 | 1.2E-02 | -0.40 | 5.7E-02 | <i>CDX2</i>     | -2.0 | 3.2E-02 | 0.30  | 3.0E-01 |
| <i>B3GNT2</i>    | -1.9 | 5.0E-02 | -0.39 | 6.4E-02 | <i>SLC22A5</i>  | -2.0 | 3.8E-02 | 0.26  | 3.9E-01 |
| <i>RPS24</i>     | -1.9 | 2.4E-02 | -0.66 | 1.3E-03 | <i>LONRF3</i>   | -2.0 | 2.9E-03 | 0.08  | 8.2E-01 |
| <i>BCAS1</i>     | -1.9 | 1.3E-02 | -0.55 | 1.0E-02 | <i>MPST</i>     | -2.0 | 1.4E-02 | 0.42  | 1.2E-01 |



|                 |      |         |       |         |                 |      |         |       |         |
|-----------------|------|---------|-------|---------|-----------------|------|---------|-------|---------|
| <i>USP48</i>    | -1.9 | 3.7E-03 | -0.37 | 8.2E-02 | <i>RCN3</i>     | -2.1 | 4.3E-02 | 0.15  | 6.6E-01 |
| <i>TOP2A</i>    | -1.9 | 2.8E-02 | -0.29 | 1.6E-01 | <i>NCKAP5</i>   | -2.1 | 1.5E-02 | 0.46  | 7.0E-02 |
| <i>SDAD1</i>    | -1.9 | 9.9E-03 | -0.43 | 4.4E-02 | <i>SH3BGRL2</i> | -2.1 | 8.4E-03 | 0.14  | 6.7E-01 |
| <i>TLCD2</i>    | -1.9 | 1.6E-02 | -0.33 | 1.2E-01 | <i>SERPINA6</i> | -2.1 | 3.5E-02 | -0.23 | 4.5E-01 |
| <i>RPP21</i>    | -1.9 | 4.4E-02 | -0.59 | 4.1E-03 | <i>EFCAB5</i>   | -2.1 | 2.0E-03 | -0.09 | 8.1E-01 |
| <i>NUCKS1</i>   | -1.9 | 5.7E-03 | -0.43 | 4.2E-02 | <i>OAF</i>      | -2.1 | 5.2E-05 | -0.30 | 3.1E-01 |
| <i>RBM34</i>    | -1.9 | 4.7E-02 | -0.37 | 7.7E-02 | <i>IL37</i>     | -2.1 | 8.6E-03 | -0.10 | 7.9E-01 |
| <i>DDAH2</i>    | -1.9 | 4.4E-02 | -0.12 | 5.7E-01 | <i>ADIRF</i>    | -2.1 | 4.9E-02 | 0.27  | 3.6E-01 |
| <i>PUM3</i>     | -1.9 | 3.5E-02 | -0.46 | 3.0E-02 | <i>TPRN</i>     | -2.1 | 1.5E-02 | -0.09 | 8.1E-01 |
| <i>BDP1</i>     | -1.9 | 3.1E-02 | -0.45 | 3.4E-02 | <i>MYZAP</i>    | -2.1 | 1.4E-04 | 0.26  | 3.9E-01 |
| <i>PRR11</i>    | -1.9 | 4.4E-02 | -0.10 | 6.4E-01 | <i>PLA2R1</i>   | -2.1 | 3.8E-02 | 0.26  | 3.8E-01 |
| <i>MYADM</i>    | -1.9 | 2.4E-02 | -0.43 | 4.4E-02 | <i>GJB1</i>     | -2.1 | 3.1E-03 | -0.39 | 1.4E-01 |
| <i>IL32</i>     | -1.9 | 2.2E-02 | -0.22 | 2.7E-01 | <i>TCTA</i>     | -2.1 | 1.5E-02 | -0.26 | 3.9E-01 |
| <i>CKAP4</i>    | -1.9 | 7.0E-03 | -0.69 | 7.3E-04 | <i>CLDN15</i>   | -2.1 | 1.1E-03 | -0.03 | 9.3E-01 |
| <i>ATF6B</i>    | -1.9 | 3.8E-02 | -0.41 | 5.5E-02 | <i>LCE2A</i>    | -2.1 | 1.8E-02 | -0.11 | 7.6E-01 |
| <i>MEPCE</i>    | -1.9 | 1.8E-02 | -0.49 | 2.3E-02 | <i>PRR15</i>    | -2.1 | 4.9E-03 | -0.11 | 7.6E-01 |
| <i>C6orf132</i> | -1.9 | 3.1E-02 | -0.39 | 6.4E-02 | <i>CYP4F12</i>  | -2.1 | 6.5E-03 | 0.00  | 1.0E+00 |
| <i>ZNF69</i>    | -1.9 | 4.5E-02 | -0.24 | 2.3E-01 | <i>P2RY1</i>    | -2.1 | 4.4E-02 | -0.58 | 1.3E-02 |
| <i>CCDC112</i>  | -1.9 | 1.6E-02 | -0.32 | 1.3E-01 | <i>MOGAT2</i>   | -2.1 | 1.5E-03 | -0.34 | 2.3E-01 |
| <i>CWC15</i>    | -1.9 | 3.3E-03 | -0.60 | 3.8E-03 | <i>PCOTH</i>    | -2.1 | 4.8E-02 | -0.32 | 2.8E-01 |
| <i>MRPL21</i>   | -1.9 | 3.5E-02 | -0.43 | 4.2E-02 | <i>GLOD5</i>    | -2.1 | 3.1E-02 | -0.19 | 5.3E-01 |
| <i>NDUFV3</i>   | -1.9 | 3.0E-02 | -0.45 | 3.4E-02 | <i>GLB1L2</i>   | -2.1 | 2.1E-02 | -0.21 | 4.9E-01 |
| <i>WDR43</i>    | -1.9 | 7.3E-03 | -0.48 | 2.4E-02 | <i>TM4SF5</i>   | -2.1 | 4.0E-02 | -0.10 | 7.8E-01 |
| <i>LGALS9</i>   | -1.9 | 3.2E-02 | -0.14 | 4.8E-01 | <i>TMEM177</i>  | -2.1 | 1.5E-02 | -0.40 | 1.3E-01 |
| <i>TNPO2</i>    | -1.9 | 2.7E-02 | -0.22 | 2.7E-01 | <i>KLF8</i>     | -2.1 | 1.4E-02 | 0.30  | 3.0E-01 |
| <i>EIF3CL</i>   | -1.9 | 3.8E-02 | -0.37 | 7.7E-02 | <i>FLVCR1</i>   | -2.1 | 4.4E-03 | 0.46  | 6.8E-02 |
| <i>NDRG2</i>    | -1.9 | 3.4E-02 | -0.57 | 6.7E-03 | <i>TMEM37</i>   | -2.1 | 3.1E-02 | 0.14  | 6.7E-01 |
| <i>COX16</i>    | -1.9 | 1.8E-02 | -0.35 | 9.3E-02 | <i>NETO2</i>    | -2.1 | 7.5E-03 | 0.42  | 1.2E-01 |
| <i>CWF19L2</i>  | -1.9 | 1.6E-02 | -0.54 | 1.1E-02 | <i>A1CF</i>     | -2.1 | 2.5E-02 | 0.11  | 7.7E-01 |
| <i>TAPBPL</i>   | -1.9 | 2.6E-02 | -0.36 | 8.7E-02 | <i>TMEM253</i>  | -2.2 | 2.0E-02 | -0.35 | 2.2E-01 |
| <i>EPB41L1</i>  | -1.9 | 3.8E-02 | -0.07 | 7.6E-01 | <i>EPB41LAB</i> | -2.2 | 8.8E-03 | 0.35  | 2.2E-01 |
| <i>BRCA1</i>    | -1.9 | 2.6E-02 | -0.27 | 1.8E-01 | <i>SLITRK6</i>  | -2.2 | 4.7E-02 | -0.08 | 8.3E-01 |
| <i>ANP32B</i>   | -1.9 | 4.0E-03 | -0.27 | 1.9E-01 | <i>ZBTB7C</i>   | -2.2 | 3.3E-02 | -0.20 | 5.2E-01 |
| <i>ZC3H15</i>   | -1.9 | 3.3E-03 | -0.43 | 4.3E-02 | <i>TRPM4</i>    | -2.2 | 5.0E-03 | -0.23 | 4.5E-01 |
| <i>PIK3R3</i>   | -1.9 | 2.1E-02 | -0.28 | 1.7E-01 | <i>CES2</i>     | -2.2 | 3.7E-03 | 0.02  | 9.6E-01 |
| <i>WDR76</i>    | -1.9 | 2.7E-02 | -0.20 | 3.3E-01 | <i>NDRG2</i>    | -2.2 | 2.8E-02 | -0.57 | 1.4E-02 |
| <i>SPAG7</i>    | -2.0 | 2.7E-02 | -0.71 | 5.0E-04 | <i>ACAA1</i>    | -2.2 | 6.2E-05 | -0.30 | 3.0E-01 |
| <i>AP2B1</i>    | -2.0 | 3.1E-02 | -0.64 | 2.2E-03 | <i>MAOA</i>     | -2.2 | 1.6E-02 | -0.24 | 4.2E-01 |
| <i>ATAD2</i>    | -2.0 | 1.7E-02 | -0.51 | 1.7E-02 | <i>FXYD3</i>    | -2.2 | 5.3E-05 | -0.16 | 6.0E-01 |
| <i>EBP</i>      | -2.0 | 2.6E-02 | -0.49 | 2.0E-02 | <i>SEMA5A</i>   | -2.2 | 2.3E-02 | 0.10  | 7.9E-01 |
| <i>MRPS18B</i>  | -2.0 | 3.7E-03 | -0.32 | 1.3E-01 | <i>CDKN2B</i>   | -2.2 | 6.6E-03 | 0.06  | 8.8E-01 |
| <i>FAM193A</i>  | -2.0 | 3.0E-02 | -0.16 | 4.3E-01 | <i>PDK4</i>     | -2.2 | 2.3E-02 | 0.20  | 5.2E-01 |
| <i>FAM208B</i>  | -2.0 | 4.0E-02 | -0.24 | 2.4E-01 | <i>NICN1</i>    | -2.2 | 1.7E-03 | 0.13  | 7.1E-01 |
| <i>THOC5</i>    | -2.0 | 2.7E-02 | -0.30 | 1.5E-01 | <i>CMBL</i>     | -2.2 | 2.7E-03 | 0.59  | 1.1E-02 |

|                 |      |         |       |         |                   |      |         |       |         |
|-----------------|------|---------|-------|---------|-------------------|------|---------|-------|---------|
| <i>PKP4</i>     | -2.0 | 1.2E-03 | -0.39 | 6.8E-02 | <i>UFSP1</i>      | -2.3 | 3.2E-03 | 0.04  | 9.0E-01 |
| <i>CEP104</i>   | -2.0 | 9.2E-03 | -0.46 | 3.3E-02 | <i>PDSS1</i>      | -2.3 | 4.4E-02 | 0.12  | 7.3E-01 |
| <i>APOBEC3C</i> | -2.0 | 1.7E-02 | -0.63 | 2.3E-03 | <i>HOXB8</i>      | -2.3 | 2.6E-02 | 0.34  | 2.4E-01 |
| <i>GNL2</i>     | -2.0 | 4.2E-02 | -0.57 | 7.0E-03 | <i>AGFG2</i>      | -2.3 | 1.9E-03 | 0.34  | 2.4E-01 |
| <i>PPP1R10</i>  | -2.0 | 1.5E-02 | -0.26 | 2.0E-01 | <i>DDAH2</i>      | -2.3 | 5.2E-05 | -0.12 | 7.4E-01 |
| <i>CEP152</i>   | -2.0 | 1.1E-02 | -0.11 | 5.7E-01 | <i>TMEM56</i>     | -2.3 | 1.1E-02 | 0.46  | 6.7E-02 |
| <i>NOMO1</i>    | -2.0 | 1.7E-02 | -0.29 | 1.7E-01 | <i>ALKAL2</i>     | -2.3 | 5.5E-04 | 0.07  | 8.4E-01 |
| <i>PSMG3</i>    | -2.0 | 3.3E-02 | -0.56 | 8.5E-03 | <i>ARSE</i>       | -2.3 | 6.2E-03 | -0.24 | 4.3E-01 |
| <i>ENDOD1</i>   | -2.0 | 1.2E-02 | -0.62 | 2.5E-03 | <i>AHCYL2</i>     | -2.3 | 1.5E-03 | -0.13 | 7.1E-01 |
| <i>TRA2A</i>    | -2.0 | 1.1E-02 | -0.36 | 9.1E-02 | <i>RHOU</i>       | -2.3 | 1.7E-03 | 0.04  | 9.2E-01 |
| <i>KMT5A</i>    | -2.0 | 1.4E-02 | -0.25 | 2.2E-01 | <i>FAM213A</i>    | -2.3 | 1.2E-03 | 0.18  | 5.7E-01 |
| <i>LYAR</i>     | -2.0 | 4.2E-02 | -0.42 | 4.8E-02 | <i>TINAG</i>      | -2.3 | 3.8E-02 | -0.47 | 6.2E-02 |
| <i>ZFP62</i>    | -2.0 | 2.1E-02 | -0.46 | 3.2E-02 | <i>MAP7D2</i>     | -2.3 | 2.9E-02 | -0.58 | 1.3E-02 |
| <i>TRAPP6A</i>  | -2.0 | 2.4E-02 | -0.24 | 2.4E-01 | <i>SLC19A3</i>    | -2.3 | 1.0E-02 | 0.21  | 4.9E-01 |
| <i>MYH14</i>    | -2.0 | 4.5E-02 | -0.01 | 9.4E-01 | <i>TBX10</i>      | -2.3 | 3.5E-02 | -0.23 | 4.4E-01 |
| <i>TMEM125</i>  | -2.0 | 1.3E-02 | -0.43 | 4.5E-02 | <i>BMP5</i>       | -2.3 | 6.9E-03 | 0.60  | 1.1E-02 |
| <i>HAUS6</i>    | -2.0 | 7.0E-03 | -0.31 | 1.4E-01 | <i>FOXO4</i>      | -2.3 | 2.9E-02 | 0.06  | 8.8E-01 |
| <i>DHRS7B</i>   | -2.0 | 1.9E-02 | -0.44 | 4.1E-02 | <i>SLC4A10</i>    | -2.3 | 1.5E-02 | 0.22  | 4.6E-01 |
| <i>CCDC47</i>   | -2.1 | 4.2E-03 | -0.18 | 3.9E-01 | <i>MACROD1</i>    | -2.3 | 2.3E-02 | 0.17  | 5.8E-01 |
| <i>HSF2</i>     | -2.1 | 3.5E-02 | -0.32 | 1.3E-01 | <i>CA12</i>       | -2.4 | 2.4E-03 | 0.33  | 2.4E-01 |
| <i>CDT1</i>     | -2.1 | 3.9E-02 | -0.30 | 1.5E-01 | <i>AC092587.1</i> | -2.4 | 5.0E-02 | -0.10 | 7.8E-01 |
| <i>CPSF3</i>    | -2.1 | 3.7E-03 | -0.42 | 4.8E-02 | <i>SLC27A4</i>    | -2.4 | 2.5E-02 | 0.28  | 3.5E-01 |
| <i>FAM32A</i>   | -2.1 | 7.6E-03 | -0.61 | 3.1E-03 | <i>NUDT4P1</i>    | -2.4 | 8.6E-03 | 0.05  | 8.9E-01 |
| <i>SYTL4</i>    | -2.1 | 3.1E-02 | -0.60 | 3.8E-03 | <i>TST</i>        | -2.4 | 1.5E-03 | -0.02 | 9.6E-01 |
| <i>SRFBP1</i>   | -2.1 | 4.8E-02 | -0.29 | 1.6E-01 | <i>CCDC153</i>    | -2.4 | 1.0E-02 | -0.36 | 2.1E-01 |
| <i>DTX3L</i>    | -2.1 | 3.4E-02 | -0.05 | 8.2E-01 | <i>PMM1</i>       | -2.4 | 1.3E-03 | 0.10  | 7.8E-01 |
| <i>GRIPAP1</i>  | -2.1 | 6.2E-03 | -0.21 | 3.0E-01 | <i>TMUB1</i>      | -2.4 | 8.5E-03 | 0.18  | 5.7E-01 |
| <i>GTSE1</i>    | -2.1 | 2.4E-02 | -0.32 | 1.3E-01 | <i>SLC13A2</i>    | -2.4 | 2.6E-02 | -0.60 | 1.1E-02 |
| <i>AURKA</i>    | -2.1 | 3.7E-03 | -0.45 | 3.6E-02 | <i>PPP2R5D</i>    | -2.4 | 2.5E-02 | 0.01  | 9.8E-01 |
| <i>TANGO2</i>   | -2.1 | 3.5E-02 | -0.28 | 1.8E-01 | <i>NAT8</i>       | -2.4 | 1.7E-02 | -0.08 | 8.3E-01 |
| <i>GPI</i>      | -2.1 | 1.0E-02 | -0.47 | 2.9E-02 | <i>AMACR</i>      | -2.4 | 1.5E-02 | -0.34 | 2.3E-01 |
| <i>HDAC7</i>    | -2.1 | 2.3E-03 | -0.42 | 4.7E-02 | <i>DHRS11</i>     | -2.4 | 3.2E-03 | 0.53  | 2.7E-02 |
| <i>ADRM1</i>    | -2.1 | 4.8E-02 | -0.54 | 1.1E-02 | <i>METTL7B</i>    | -2.4 | 4.2E-02 | 0.44  | 9.0E-02 |
| <i>NDST1</i>    | -2.1 | 4.3E-02 | -0.38 | 7.7E-02 | <i>PLA2G12B</i>   | -2.4 | 2.2E-02 | -0.34 | 2.4E-01 |
| <i>UPF3B</i>    | -2.1 | 9.0E-03 | -0.46 | 3.2E-02 | <i>ACOT4</i>      | -2.4 | 1.3E-02 | 0.15  | 6.6E-01 |
| <i>STAU2</i>    | -2.1 | 6.2E-03 | -0.24 | 2.3E-01 | <i>INPP5J</i>     | -2.5 | 5.8E-03 | 0.07  | 8.4E-01 |
| <i>CENPL</i>    | -2.1 | 1.4E-02 | -0.48 | 2.4E-02 | <i>MEP1A</i>      | -2.5 | 2.2E-02 | 0.40  | 1.3E-01 |
| <i>PPDPF</i>    | -2.1 | 4.2E-03 | -0.19 | 3.5E-01 | <i>AC007906.2</i> | -2.5 | 1.8E-02 | -0.07 | 8.4E-01 |
| <i>EEF1D</i>    | -2.1 | 1.5E-02 | -0.61 | 3.1E-03 | <i>ACADS</i>      | -2.5 | 1.7E-03 | -0.12 | 7.2E-01 |
| <i>GJB1</i>     | -2.1 | 2.5E-02 | -0.39 | 6.5E-02 | <i>ADH1C</i>      | -2.5 | 3.9E-02 | 0.40  | 1.3E-01 |
| <i>SLC39A11</i> | -2.1 | 2.1E-02 | -0.59 | 4.3E-03 | <i>HR</i>         | -2.5 | 1.7E-03 | -0.48 | 5.2E-02 |
| <i>USP28</i>    | -2.1 | 2.4E-02 | -0.20 | 3.3E-01 | <i>PDXP</i>       | -2.5 | 4.2E-02 | -0.22 | 4.7E-01 |
| <i>GPR89B</i>   | -2.1 | 3.5E-02 | -0.44 | 4.1E-02 | <i>PDK2</i>       | -2.5 | 2.3E-03 | -0.02 | 9.7E-01 |
| <i>RNF214</i>   | -2.1 | 3.7E-02 | -0.40 | 5.7E-02 | <i>IQCM</i>       | -2.5 | 3.6E-02 | -0.19 | 5.4E-01 |

|                  |      |         |       |         |                   |      |         |       |         |
|------------------|------|---------|-------|---------|-------------------|------|---------|-------|---------|
| <i>KIF15</i>     | -2.1 | 4.6E-02 | -0.42 | 4.8E-02 | <i>MUC20</i>      | -2.5 | 1.3E-02 | -0.09 | 8.1E-01 |
| <i>PES1</i>      | -2.1 | 3.1E-02 | -0.14 | 4.8E-01 | <i>SYCP3</i>      | -2.5 | 3.4E-04 | -0.35 | 2.3E-01 |
| <i>SAALI</i>     | -2.1 | 6.2E-03 | -0.28 | 1.8E-01 | <i>MTRNR2L12</i>  | -2.5 | 3.2E-02 | -0.15 | 6.5E-01 |
| <i>MKI67</i>     | -2.1 | 1.7E-02 | -0.37 | 8.2E-02 | <i>FCGRT</i>      | -2.5 | 2.4E-04 | 0.10  | 7.8E-01 |
| <i>TNFAIP8L1</i> | -2.2 | 3.7E-03 | -0.23 | 2.7E-01 | <i>LTK</i>        | -2.5 | 4.2E-03 | 0.21  | 5.0E-01 |
| <i>CMIP</i>      | -2.2 | 1.3E-02 | -0.26 | 2.0E-01 | <i>SGK2</i>       | -2.5 | 3.7E-03 | 0.07  | 8.4E-01 |
| <i>SYCP3</i>     | -2.2 | 8.5E-03 | -0.35 | 1.0E-01 | <i>SLC16A1</i>    | -2.5 | 1.7E-03 | 0.31  | 2.9E-01 |
| <i>KHSRP</i>     | -2.2 | 1.8E-02 | -0.17 | 4.0E-01 | <i>CDK3</i>       | -2.5 | 1.5E-03 | -0.11 | 7.6E-01 |
| <i>DYNC1H1</i>   | -2.2 | 3.2E-03 | -0.44 | 3.7E-02 | <i>NDRG1</i>      | -2.6 | 6.7E-05 | 0.41  | 1.3E-01 |
| <i>TRIAP1</i>    | -2.2 | 1.3E-02 | -0.52 | 1.5E-02 | <i>NUDT14</i>     | -2.6 | 5.9E-03 | 0.11  | 7.6E-01 |
| <i>RAD9A</i>     | -2.2 | 8.5E-03 | -0.05 | 8.3E-01 | <i>ANK3</i>       | -2.6 | 9.1E-04 | 0.11  | 7.5E-01 |
| <i>SIRT6</i>     | -2.2 | 8.4E-03 | -0.39 | 6.3E-02 | <i>WSCD1</i>      | -2.6 | 2.8E-02 | -0.02 | 9.7E-01 |
| <i>TTK</i>       | -2.2 | 2.2E-02 | -0.37 | 7.7E-02 | <i>PDE6A</i>      | -2.6 | 2.8E-02 | 0.20  | 5.2E-01 |
| <i>SLC39A7</i>   | -2.2 | 1.2E-02 | -0.49 | 2.0E-02 | <i>RETSAT</i>     | -2.6 | 1.5E-04 | -0.39 | 1.4E-01 |
| <i>AQP1</i>      | -2.2 | 3.3E-02 | -0.54 | 1.1E-02 | <i>SCIN</i>       | -2.6 | 2.5E-02 | 0.19  | 5.4E-01 |
| <i>SDHAF2</i>    | -2.2 | 1.0E-02 | -0.46 | 3.2E-02 | <i>RAB6B</i>      | -2.6 | 5.2E-03 | 0.47  | 6.0E-02 |
| <i>NCL</i>       | -2.3 | 4.9E-03 | -0.51 | 1.6E-02 | <i>FABP1</i>      | -2.6 | 6.8E-03 | 0.19  | 5.4E-01 |
| <i>PCDH1</i>     | -2.3 | 3.2E-02 | -0.31 | 1.5E-01 | <i>NEURLIB</i>    | -2.6 | 3.1E-03 | -0.21 | 5.1E-01 |
| <i>STRN3</i>     | -2.3 | 1.1E-02 | -0.39 | 6.6E-02 | <i>SAMD13</i>     | -2.6 | 8.7E-04 | -0.13 | 7.1E-01 |
| <i>MPHOSPH6</i>  | -2.3 | 3.3E-03 | -0.45 | 3.4E-02 | <i>HSD17B2</i>    | -2.6 | 9.2E-03 | 0.66  | 4.8E-03 |
| <i>ZFC3H1</i>    | -2.3 | 1.5E-02 | -0.26 | 2.0E-01 | <i>SLC22A18AS</i> | -2.6 | 1.2E-03 | -0.20 | 5.2E-01 |
| <i>SMC1A</i>     | -2.3 | 3.3E-03 | -0.42 | 4.8E-02 | <i>LDHD</i>       | -2.7 | 1.8E-02 | -0.07 | 8.5E-01 |
| <i>FUBP1</i>     | -2.3 | 6.3E-03 | -0.38 | 7.7E-02 | <i>WDR78</i>      | -2.7 | 1.8E-02 | 0.30  | 3.1E-01 |
| <i>PPP3R1</i>    | -2.3 | 6.2E-03 | -0.39 | 6.5E-02 | <i>ACSF2</i>      | -2.7 | 3.1E-02 | 0.29  | 3.3E-01 |
| <i>CKAP2L</i>    | -2.3 | 3.3E-02 | -0.51 | 1.6E-02 | <i>ACOX1</i>      | -2.7 | 4.2E-04 | 0.27  | 3.6E-01 |
| <i>MUC3A</i>     | -2.3 | 3.1E-02 | -0.19 | 3.5E-01 | <i>SELENBP1</i>   | -2.7 | 4.4E-02 | -0.41 | 1.2E-01 |
| <i>TTI1</i>      | -2.3 | 1.1E-02 | -0.44 | 3.7E-02 | <i>MYLPF</i>      | -2.7 | 5.0E-03 | -0.14 | 6.7E-01 |
| <i>DCAKD</i>     | -2.3 | 4.0E-02 | -0.42 | 4.6E-02 | <i>NEURL3</i>     | -2.7 | 2.0E-02 | -0.04 | 9.1E-01 |
| <i>GPT2</i>      | -2.4 | 2.0E-02 | -0.05 | 8.0E-01 | <i>KRT12</i>      | -2.7 | 3.0E-02 | 0.30  | 3.0E-01 |
| <i>THOP1</i>     | -2.4 | 1.8E-02 | -0.54 | 1.1E-02 | <i>SOWAHA</i>     | -2.7 | 6.9E-03 | 0.43  | 9.7E-02 |
| <i>CNTLN</i>     | -2.4 | 4.5E-02 | -0.30 | 1.5E-01 | <i>C2orf54</i>    | -2.8 | 3.7E-03 | -0.08 | 8.3E-01 |
| <i>PTMA</i>      | -2.4 | 4.3E-03 | -0.39 | 6.4E-02 | <i>SLC38A4</i>    | -2.8 | 2.0E-02 | 0.58  | 1.3E-02 |
| <i>TUBA1C</i>    | -2.4 | 2.2E-02 | -0.54 | 1.1E-02 | <i>NHEJ1</i>      | -2.8 | 6.1E-03 | -0.50 | 4.0E-02 |
| <i>HYOU1</i>     | -2.4 | 1.1E-02 | 0.00  | 9.9E-01 | <i>PHGR1</i>      | -2.8 | 4.1E-03 | -0.30 | 3.0E-01 |
| <i>ARHGEF11</i>  | -2.4 | 3.1E-02 | -0.09 | 6.5E-01 | <i>IGSF9</i>      | -2.8 | 2.3E-02 | -0.35 | 2.2E-01 |
| <i>NCAPG</i>     | -2.4 | 3.8E-02 | -0.48 | 2.3E-02 | <i>GXYLT2</i>     | -2.9 | 3.5E-02 | 0.48  | 5.2E-02 |
| <i>NDUFS2</i>    | -2.4 | 1.5E-02 | -0.53 | 1.3E-02 | <i>ENTPD5</i>     | -2.9 | 1.0E-03 | 0.29  | 3.2E-01 |
| <i>ATP5EP2</i>   | -2.4 | 8.1E-03 | -0.44 | 4.0E-02 | <i>VIPR1</i>      | -2.9 | 9.5E-05 | -0.24 | 4.2E-01 |
| <i>FER1L6</i>    | -2.5 | 4.1E-02 | -0.27 | 1.8E-01 | <i>BMP3</i>       | -2.9 | 2.0E-02 | -0.06 | 8.8E-01 |
| <i>HHLA2</i>     | -2.5 | 2.6E-02 | -0.63 | 2.4E-03 | <i>SLC20A1</i>    | -3.0 | 3.3E-03 | 0.59  | 1.2E-02 |
| <i>HMGNS</i>     | -2.5 | 1.2E-02 | -0.39 | 6.5E-02 | <i>PLCD1</i>      | -3.0 | 4.0E-03 | 0.42  | 1.1E-01 |
| <i>PADI2</i>     | -2.5 | 9.2E-03 | -0.22 | 2.7E-01 | <i>PIGZ</i>       | -3.0 | 1.1E-02 | -0.38 | 1.7E-01 |
| <i>PSMC3</i>     | -2.5 | 4.1E-03 | -0.50 | 1.9E-02 | <i>SLC39A5</i>    | -3.0 | 4.2E-02 | 0.13  | 6.9E-01 |
| <i>IL2RA</i>     | -2.5 | 2.2E-02 | -0.17 | 4.1E-01 | <i>CCNJL</i>      | -3.1 | 4.1E-03 | 0.31  | 3.0E-01 |

|                   |       |         |       |         |                 |       |         |       |         |
|-------------------|-------|---------|-------|---------|-----------------|-------|---------|-------|---------|
| <i>SMARCB1</i>    | -2.5  | 1.1E-02 | -0.60 | 3.8E-03 | <i>CYP2B6</i>   | -3.1  | 1.3E-02 | 0.50  | 4.3E-02 |
| <i>SI00A13</i>    | -2.6  | 1.3E-02 | -0.52 | 1.5E-02 | <i>TIGD6</i>    | -3.1  | 8.8E-04 | 0.04  | 9.2E-01 |
| <i>TRMT11</i>     | -2.6  | 1.1E-02 | -0.19 | 3.5E-01 | <i>CHP2</i>     | -3.2  | 1.6E-02 | -0.52 | 3.0E-02 |
| <i>MND1</i>       | -2.6  | 4.4E-02 | -0.35 | 1.0E-01 | <i>SLC23A3</i>  | -3.2  | 4.2E-03 | 0.61  | 9.9E-03 |
| <i>SWI5</i>       | -2.6  | 4.2E-02 | -0.35 | 9.4E-02 | <i>DISP2</i>    | -3.3  | 9.2E-05 | -0.02 | 9.7E-01 |
| <i>ZNF625</i>     | -2.6  | 4.2E-02 | -0.30 | 1.6E-01 | <i>SULT1A2</i>  | -3.4  | 1.1E-02 | 0.02  | 9.7E-01 |
| <i>B3GNT7</i>     | -2.6  | 9.0E-03 | -0.66 | 1.3E-03 | <i>BEST2</i>    | -3.4  | 4.2E-02 | -0.50 | 4.5E-02 |
| <i>DONSON</i>     | -2.7  | 2.4E-02 | -0.32 | 1.3E-01 | <i>PRKG2</i>    | -3.4  | 3.3E-03 | -0.33 | 2.5E-01 |
| <i>NCDN</i>       | -2.7  | 2.7E-02 | -0.45 | 3.5E-02 | <i>ABCG2</i>    | -3.5  | 3.4E-02 | 0.25  | 4.0E-01 |
| <i>CETN3</i>      | -2.8  | 3.7E-03 | -0.41 | 5.4E-02 | <i>SLC17A4</i>  | -3.5  | 3.0E-03 | 0.29  | 3.3E-01 |
| <i>VNN2</i>       | -2.8  | 2.9E-02 | -0.40 | 6.2E-02 | <i>SLC16A9</i>  | -3.5  | 4.3E-02 | -0.12 | 7.4E-01 |
| <i>IL11RA</i>     | -2.8  | 9.9E-03 | -0.40 | 5.7E-02 | <i>OTOP2</i>    | -3.6  | 2.7E-02 | -0.32 | 2.7E-01 |
| <i>PYCR1</i>      | -2.9  | 4.6E-02 | -0.29 | 1.6E-01 | <i>TMIGD1</i>   | -3.6  | 4.6E-02 | -0.58 | 1.2E-02 |
| <i>POCIA</i>      | -2.9  | 3.7E-03 | -0.29 | 1.6E-01 | <i>CKB</i>      | -3.7  | 1.2E-02 | -0.54 | 2.6E-02 |
| <i>SFN</i>        | -2.9  | 9.2E-03 | -0.11 | 5.9E-01 | <i>DEFB1</i>    | -3.7  | 9.8E-05 | 0.49  | 4.6E-02 |
| <i>PAK1IP1</i>    | -3.8  | 2.0E-02 | -0.52 | 1.5E-02 | <i>LYPD8</i>    | -3.7  | 4.2E-02 | 0.27  | 3.7E-01 |
| <i>PLTP</i>       | -3.9  | 3.1E-02 | -0.35 | 9.8E-02 | <i>MEP1B</i>    | -3.9  | 8.5E-03 | 0.46  | 6.8E-02 |
| <i>NOX1</i>       | -4.3  | 2.3E-02 | -0.63 | 2.3E-03 | <i>PITX2</i>    | -3.9  | 4.2E-02 | 0.60  | 1.0E-02 |
| <i>EME1</i>       | -6.2  | 1.1E-02 | -0.28 | 1.7E-01 | <i>AQP7</i>     | -4.0  | 1.2E-04 | -0.02 | 9.7E-01 |
| <i>AC073610.2</i> | -8.4  | 1.1E-02 | -0.07 | 7.4E-01 | <i>FRMD1</i>    | -4.1  | 2.0E-03 | -0.19 | 5.4E-01 |
| <i>NME7</i>       | -9.5  | 1.8E-03 | -0.27 | 1.8E-01 | <i>SLC51A</i>   | -4.1  | 2.4E-04 | 0.54  | 2.5E-02 |
| <i>DND1</i>       | -13.6 | 3.2E-03 | -0.36 | 8.7E-02 | <i>B4GALNT2</i> | -4.3  | 3.5E-02 | 0.54  | 2.5E-02 |
| <i>SULT1A4</i>    | -13.9 | 3.1E-04 | -0.51 | 1.6E-02 | <i>PADI2</i>    | -4.3  | 9.3E-04 | -0.22 | 4.7E-01 |
|                   |       |         |       |         | <i>ZG16</i>     | -4.4  | 4.9E-02 | -0.24 | 4.3E-01 |
|                   |       |         |       |         | <i>PCK1</i>     | -4.6  | 1.9E-02 | 0.03  | 9.5E-01 |
|                   |       |         |       |         | <i>GSTA1</i>    | -4.7  | 2.6E-02 | -0.20 | 5.2E-01 |
|                   |       |         |       |         | <i>TNNC2</i>    | -4.8  | 2.7E-03 | -0.04 | 9.2E-01 |
|                   |       |         |       |         | <i>SLC26A2</i>  | -4.8  | 3.3E-02 | -0.05 | 8.9E-01 |
|                   |       |         |       |         | <i>SULT1A4</i>  | -4.8  | 1.3E-02 | -0.51 | 3.7E-02 |
|                   |       |         |       |         | <i>GUCA2B</i>   | -5.5  | 3.8E-02 | -0.52 | 3.1E-02 |
|                   |       |         |       |         | <i>HMGCS2</i>   | -7.5  | 9.1E-03 | 0.52  | 3.0E-02 |
|                   |       |         |       |         | <i>AQP8</i>     | -13.8 | 2.2E-02 | 0.26  | 3.9E-01 |

CD, Crohn disease; EoC, eosinophilic colitis; FC, fold change; NL, normal.

**Supplementary Table 6.** Summary of UC transcriptomic datasets

| No | Study                          | Year | Accession | Tissue | Sites of biopsies        | Age group | No. of UC cases | No. of controls | References (PMID) |
|----|--------------------------------|------|-----------|--------|--------------------------|-----------|-----------------|-----------------|-------------------|
| 1  | Olsen <i>et al.</i>            | 2007 | GSE9452   | Colon  | Descending or sigmoid    | Adults    | 8               | 5               | 19177426          |
| 2  | Wu <i>et al.</i>               | 2007 | GSE6731   | Colon  | Affected area or sigmoid | Adults    | 5               | 4               | 17262812          |
| 3  | Galamb <i>et al.</i>           | 2008 | GSE10714  | Colon  | Affected area            | Adults    | 3               | 3               | 18843029          |
| 4  | Ahrens <i>et al.</i>           | 2008 | GSE10191  | Colon  | Affected area            | Children  | 8               | 11              | 18981162          |
| 5  | Bjerrum <i>et al.</i>          | 2009 | GSE13367  | Colon  | Descending               | Adults    | 8               | 10              | 19834973          |
| 6  | Kugathasan <i>et al.</i>       | 2009 | GSE10616  | Colon  | Ascending                | Children  | 10              | 11              | 18758464          |
| 7  | Arijs <i>et al.</i>            | 2010 | GSE14580  | Colon  | Rectum                   | Adults    | 24              | 6               | 19700435          |
| 8  | Planell <i>et al.</i>          | 2012 | GSE38713  | Colon  | Sigmoid or rectum        | Adults    | 15              | 13              | 23135761          |
| 9  | Montero-Meléndez <i>et al.</i> | 2013 | GSE36807  | Colon  | Ascending                | Adults    | 15              | 7               | 24155895          |
| 10 | Bjerrum <i>et al.</i>          | 2014 | GSE47908  | Colon  | Descending               | Adults    | 20              | 15              | 25358065          |
| 11 | Vanhove <i>et al.</i>          | 2015 | GSE59071  | Colon  | Sigmoid or rectum        | Adults    | 74              | 11              | 26313692          |
| 12 | Li <i>et al.</i>               | 2018 | GSE87473  | Colon  | Sigmoid                  | Adults    | 27              | 21              | 29401083          |
| 13 | Li <i>et al.</i>               | 2018 | GSE87473  | Colon  | Ascending                | Children  | 13              | 21              | 29401083          |
| 14 | Haberman <i>et al.</i>         | 2019 | GSE109142 | Colon  | Rectum                   | Children  | 206             | 20              | 30604764          |

UC, ulcerative colitis; GSE, genomic spatial event.

**Supplementary Table 7.** List of genes in the EoC transcriptome overlapped with EoE and EoG transcriptomes

| Upregulated genes in the EoC transcriptome |                       |                                       |                       | Downregulated genes in the EoC transcriptome |                       |                                         |                       |
|--------------------------------------------|-----------------------|---------------------------------------|-----------------------|----------------------------------------------|-----------------------|-----------------------------------------|-----------------------|
| Overlapped with EoE upregulated genes      |                       | Overlapped with EoG upregulated genes |                       | Overlapped with EoE downregulated genes      |                       | Overlapped with EoG downregulated genes |                       |
| Gene Symbol                                | FC (Active EoC vs NL) | Gene Symbol                           | FC (Active EoC vs NL) | Gene Symbol                                  | FC (Active EoC vs NL) | Gene Symbol                             | FC (Active EoC vs NL) |
| <i>CLC</i>                                 | 10.2                  | <i>CLC</i>                            | 10.2                  | <i>PPDPF</i>                                 | -2.1                  | <i>NUPR1</i>                            | -1.6                  |
| <i>IFITM1</i>                              | 8.3                   | <i>GAPT</i>                           | 3.9                   | <i>C6orf132</i>                              | -1.9                  |                                         |                       |
| <i>F13A1</i>                               | 4.7                   | <i>CD9</i>                            | 3.8                   | <i>TSC22D2</i>                               | -1.7                  |                                         |                       |
| <i>IFNGR1</i>                              | 4.6                   | <i>CXCL1</i>                          | 3.6                   | <i>DDAH1</i>                                 | -1.7                  |                                         |                       |
| <i>CLDN23</i>                              | 4.4                   | <i>MMP12</i>                          | 3.2                   | <i>ACOT11</i>                                | -1.6                  |                                         |                       |
| <i>GAPT</i>                                | 3.9                   | <i>NCF2</i>                           | 3.1                   |                                              |                       |                                         |                       |
| <i>CD9</i>                                 | 3.8                   | <i>CEBPE</i>                          | 3.0                   |                                              |                       |                                         |                       |
| <i>CXCL1</i>                               | 3.6                   | <i>CSF2RB</i>                         | 2.3                   |                                              |                       |                                         |                       |
| <i>TRIM21</i>                              | 3.6                   | <i>CLDN7</i>                          | 2.2                   |                                              |                       |                                         |                       |
| <i>CD300A</i>                              | 3.4                   | <i>TMIGD3</i>                         | 2.2                   |                                              |                       |                                         |                       |
| <i>MMP12</i>                               | 3.2                   | <i>C15orf48</i>                       | 2.2                   |                                              |                       |                                         |                       |
| <i>NCF2</i>                                | 3.1                   | <i>LST1</i>                           | 2.2                   |                                              |                       |                                         |                       |
| <i>LY96</i>                                | 3.1                   | <i>CCL11</i>                          | 2.1                   |                                              |                       |                                         |                       |
| <i>CD53</i>                                | 3.1                   | <i>ADAMDE</i>                         | 2.1                   |                                              |                       |                                         |                       |
|                                            |                       | <i>CI</i>                             | 2.1                   |                                              |                       |                                         |                       |
| <i>SERPINF1</i>                            | 2.7                   | <i>PLCG2</i>                          | 2.1                   |                                              |                       |                                         |                       |
| <i>GCHI</i>                                | 2.6                   | <i>FPR1</i>                           | 1.9                   |                                              |                       |                                         |                       |
| <i>ITM2C</i>                               | 2.6                   | <i>SOCS1</i>                          | 1.7                   |                                              |                       |                                         |                       |
| <i>GLRX</i>                                | 2.5                   | <i>ALOX5AP</i>                        | 1.7                   |                                              |                       |                                         |                       |
| <i>HLA-F</i>                               | 2.5                   | <i>CD209</i>                          | 1.6                   |                                              |                       |                                         |                       |
| <i>LIPA</i>                                | 2.4                   |                                       |                       |                                              |                       |                                         |                       |
| <i>PRIM2</i>                               | 2.4                   |                                       |                       |                                              |                       |                                         |                       |
| <i>KLRB1</i>                               | 2.4                   |                                       |                       |                                              |                       |                                         |                       |
| <i>LUM</i>                                 | 2.3                   |                                       |                       |                                              |                       |                                         |                       |
| <i>B2M</i>                                 | 2.3                   |                                       |                       |                                              |                       |                                         |                       |
| <i>HLA-B</i>                               | 2.3                   |                                       |                       |                                              |                       |                                         |                       |
| <i>IL15RA</i>                              | 2.3                   |                                       |                       |                                              |                       |                                         |                       |
| <i>CSF2RB</i>                              | 2.3                   |                                       |                       |                                              |                       |                                         |                       |
| <i>RDH10</i>                               | 2.2                   |                                       |                       |                                              |                       |                                         |                       |
| <i>AMY2B</i>                               | 2.2                   |                                       |                       |                                              |                       |                                         |                       |
| <i>SIRPA</i>                               | 2.2                   |                                       |                       |                                              |                       |                                         |                       |
| <i>VIM</i>                                 | 2.1                   |                                       |                       |                                              |                       |                                         |                       |
| <i>COL3A1</i>                              | 2.1                   |                                       |                       |                                              |                       |                                         |                       |
| <i>PLAU</i>                                | 2.1                   |                                       |                       |                                              |                       |                                         |                       |
| <i>CHEK2</i>                               | 2.1                   |                                       |                       |                                              |                       |                                         |                       |
| <i>C2</i>                                  | 2.1                   |                                       |                       |                                              |                       |                                         |                       |
| <i>SLC38A9</i>                             | 2.0                   |                                       |                       |                                              |                       |                                         |                       |
| <i>LTA4H</i>                               | 2.0                   |                                       |                       |                                              |                       |                                         |                       |
| <i>CTSC</i>                                | 2.0                   |                                       |                       |                                              |                       |                                         |                       |
| <i>HIGD2A</i>                              | 1.9                   |                                       |                       |                                              |                       |                                         |                       |
| <i>ANXA4</i>                               | 1.9                   |                                       |                       |                                              |                       |                                         |                       |
| <i>GATA2</i>                               | 1.9                   |                                       |                       |                                              |                       |                                         |                       |
| <i>PSMB8</i>                               | 1.9                   |                                       |                       |                                              |                       |                                         |                       |
| <i>COTL1</i>                               | 1.8                   |                                       |                       |                                              |                       |                                         |                       |
| <i>LASP1</i>                               | 1.8                   |                                       |                       |                                              |                       |                                         |                       |
| <i>SOCS1</i>                               | 1.7                   |                                       |                       |                                              |                       |                                         |                       |
| <i>ALOX5AP</i>                             | 1.7                   |                                       |                       |                                              |                       |                                         |                       |
| <i>PTPN9</i>                               | 1.7                   |                                       |                       |                                              |                       |                                         |                       |
| <i>UBE2L6</i>                              | 1.6                   |                                       |                       |                                              |                       |                                         |                       |
| <i>THBD</i>                                | 1.6                   |                                       |                       |                                              |                       |                                         |                       |

EoC, eosinophilic colitis; EoE, eosinophilic esophagitis; EoG, eosinophilic gastritis; FC, fold change; NL, normal.

**Supplementary Table 8.** Functional annotation enrichment of the EoC transcriptome

|                               | ID         | Name                                                              | Source                 | P value | FDR B&H | Genes from Input | Genes in Annotation |
|-------------------------------|------------|-------------------------------------------------------------------|------------------------|---------|---------|------------------|---------------------|
| <b>327 Upregulated genes</b>  |            |                                                                   |                        |         |         |                  |                     |
| <b>GO: Molecular Function</b> |            |                                                                   |                        |         |         |                  |                     |
| 1                             | GO:0015932 | nucleobase-containing compound transmembrane transporter activity | GO: Molecular Function | 4.3E-05 | 3.4E-02 | 8                | 45                  |
| 2                             | GO:0008234 | cysteine-type peptidase activity                                  | GO: Molecular Function | 6.6E-05 | 3.4E-02 | 40               | 711                 |
| 3                             | GO:0004464 | leukotriene-C4 synthase activity                                  | GO: Molecular Function | 9.8E-05 | 3.4E-02 | 3                | 4                   |
| 4                             | GO:0003735 | structural constituent of ribosome                                | GO: Molecular Function | 1.2E-04 | 3.4E-02 | 17               | 205                 |
| 5                             | GO:0003723 | RNA binding                                                       | GO: Molecular Function | 1.8E-04 | 4.1E-02 | 85               | 1973                |
| 6                             | GO:0015165 | pyrimidine nucleotide-sugar transmembrane transporter activity    | GO: Molecular Function | 3.0E-04 | 4.9E-02 | 4                | 12                  |
| 7                             | GO:0004865 | protein serine/threonine phosphatase inhibitor activity           | GO: Molecular Function | 3.0E-04 | 4.9E-02 | 4                | 12                  |
| <b>GO: Biological Process</b> |            |                                                                   |                        |         |         |                  |                     |
| 1                             | GO:0044265 | cellular macromolecule catabolic process                          | GO: Biological Process | 2.0E-09 | 1.2E-05 | 71               | 1201                |
| 2                             | GO:0043299 | leukocyte degranulation                                           | GO: Biological Process | 3.8E-09 | 1.2E-05 | 42               | 546                 |
| 3                             | GO:0002275 | myeloid cell activation involved in immune response               | GO: Biological Process | 6.8E-09 | 1.4E-05 | 42               | 557                 |
| 4                             | GO:0009057 | macromolecule catabolic process                                   | GO: Biological Process | 9.8E-09 | 1.5E-05 | 79               | 1453                |
| 5                             | GO:0002444 | myeloid leukocyte mediated immunity                               | GO: Biological Process | 1.2E-08 | 1.5E-05 | 42               | 568                 |
| 6                             | GO:0042119 | neutrophil activation                                             | GO: Biological Process | 3.3E-08 | 2.7E-05 | 38               | 502                 |
| 7                             | GO:0006614 | SRP-dependent cotranslational protein targeting to membrane       | GO: Biological Process | 3.7E-08 | 2.7E-05 | 16               | 105                 |
| 8                             | GO:0002446 | neutrophil mediated immunity                                      | GO: Biological Process | 4.1E-08 | 2.7E-05 | 38               | 506                 |
| 9                             | GO:0045047 | protein targeting to ER                                           | GO: Biological Process | 4.2E-08 | 2.7E-05 | 17               | 120                 |
| 10                            | GO:0036230 | granulocyte activation                                            | GO: Biological Process | 4.5E-08 | 2.7E-05 | 38               | 508                 |

|    |            |                                                                |                        |         |         |    |      |
|----|------------|----------------------------------------------------------------|------------------------|---------|---------|----|------|
| 11 | GO:0043312 | neutrophil degranulation                                       | GO: Biological Process | 4.8E-08 | 2.7E-05 | 37 | 488  |
| 12 | GO:0002283 | neutrophil activation involved in immune response              | GO: Biological Process | 5.6E-08 | 2.9E-05 | 37 | 491  |
| 13 | GO:0006613 | cotranslational protein targeting to membrane                  | GO: Biological Process | 6.3E-08 | 3.0E-05 | 16 | 109  |
| 14 | GO:0072599 | establishment of protein localization to endoplasmic reticulum | GO: Biological Process | 6.9E-08 | 3.0E-05 | 17 | 124  |
| 15 | GO:0006402 | mRNA catabolic process                                         | GO: Biological Process | 1.0E-07 | 4.1E-05 | 31 | 377  |
| 16 | GO:0016032 | viral process                                                  | GO: Biological Process | 1.3E-07 | 5.1E-05 | 52 | 853  |
| 17 | GO:0045055 | regulated exocytosis                                           | GO: Biological Process | 1.8E-07 | 6.3E-05 | 51 | 837  |
| 18 | GO:0044403 | symbiotic process                                              | GO: Biological Process | 1.8E-07 | 6.3E-05 | 54 | 911  |
| 19 | GO:0070972 | protein localization to endoplasmic reticulum                  | GO: Biological Process | 2.0E-07 | 6.4E-05 | 18 | 149  |
| 20 | GO:0080134 | regulation of response to stress                               | GO: Biological Process | 2.1E-07 | 6.4E-05 | 83 | 1671 |
| 21 | GO:0016071 | mRNA metabolic process                                         | GO: Biological Process | 7.1E-07 | 1.7E-04 | 52 | 901  |
| 22 | GO:0002274 | myeloid leukocyte activation                                   | GO: Biological Process | 7.3E-07 | 1.7E-04 | 43 | 683  |
| 23 | GO:0002237 | response to molecule of bacterial origin                       | GO: Biological Process | 7.5E-07 | 1.7E-04 | 29 | 371  |
| 24 | GO:0001775 | cell activation                                                | GO: Biological Process | 7.5E-07 | 1.7E-04 | 77 | 1558 |
| 25 | GO:0006887 | exocytosis                                                     | GO: Biological Process | 7.6E-07 | 1.7E-04 | 54 | 953  |

#### GO: Cellular Component

|   |            |                                                               |                        |         |         |    |      |
|---|------------|---------------------------------------------------------------|------------------------|---------|---------|----|------|
| 1 | GO:0005764 | lysosome                                                      | GO: Cellular Component | 1.3E-09 | 5.2E-07 | 51 | 735  |
| 2 | GO:0000323 | lytic vacuole                                                 | GO: Cellular Component | 1.4E-09 | 5.2E-07 | 51 | 736  |
| 3 | GO:0005774 | vacuolar membrane                                             | GO: Cellular Component | 5.2E-09 | 9.1E-07 | 35 | 417  |
| 4 | GO:0005765 | lysosomal membrane                                            | GO: Cellular Component | 5.6E-09 | 9.1E-07 | 32 | 359  |
| 5 | GO:0098852 | lytic vacuole membrane                                        | GO: Cellular Component | 6.0E-09 | 9.1E-07 | 32 | 360  |
| 6 | GO:0005739 | mitochondrion                                                 | GO: Cellular Component | 8.5E-08 | 1.1E-05 | 90 | 1866 |
| 7 | GO:0005789 | endoplasmic reticulum membrane                                | GO: Cellular Component | 1.1E-07 | 1.2E-05 | 61 | 1093 |
| 8 | GO:0042175 | nuclear outer membrane-endoplasmic reticulum membrane network | GO: Cellular Component | 2.3E-07 | 2.2E-05 | 61 | 1116 |



|    |            |                                        |                        |         |         |    |      |
|----|------------|----------------------------------------|------------------------|---------|---------|----|------|
| 9  | GO:0042611 | MHC protein complex                    | GO: Cellular Component | 3.1E-07 | 2.6E-05 | 8  | 26   |
| 10 | GO:0005925 | focal adhesion                         | GO: Cellular Component | 4.3E-07 | 3.2E-05 | 31 | 411  |
| 11 | GO:0030055 | cell-substrate junction                | GO: Cellular Component | 7.2E-07 | 4.9E-05 | 31 | 421  |
| 12 | GO:0022626 | cytosolic ribosome                     | GO: Cellular Component | 8.6E-07 | 5.4E-05 | 16 | 134  |
| 13 | GO:0005768 | endosome                               | GO: Cellular Component | 9.9E-07 | 5.7E-05 | 53 | 956  |
| 14 | GO:0031967 | organelle envelope                     | GO: Cellular Component | 1.2E-06 | 6.0E-05 | 65 | 1279 |
| 15 | GO:0031975 | envelope                               | GO: Cellular Component | 1.2E-06 | 6.0E-05 | 65 | 1280 |
| 16 | GO:0005794 | Golgi apparatus                        | GO: Cellular Component | 1.3E-06 | 6.2E-05 | 78 | 1643 |
| 17 | GO:0000139 | Golgi membrane                         | GO: Cellular Component | 1.7E-06 | 7.3E-05 | 45 | 770  |
| 18 | GO:1990234 | transferase complex                    | GO: Cellular Component | 1.8E-06 | 7.3E-05 | 47 | 821  |
| 19 | GO:1902494 | catalytic complex                      | GO: Cellular Component | 2.9E-06 | 1.1E-04 | 73 | 1536 |
| 20 | GO:0012506 | vesicle membrane                       | GO: Cellular Component | 4.1E-06 | 1.6E-04 | 46 | 822  |
| 21 | GO:0005740 | mitochondrial envelope                 | GO: Cellular Component | 4.6E-06 | 1.6E-04 | 45 | 800  |
| 22 | GO:0030659 | cytoplasmic vesicle membrane           | GO: Cellular Component | 4.6E-06 | 1.6E-04 | 45 | 800  |
| 23 | GO:0030141 | secretory granule                      | GO: Cellular Component | 5.7E-06 | 1.9E-04 | 48 | 884  |
| 24 | GO:0005912 | adherens junction                      | GO: Cellular Component | 5.9E-06 | 1.9E-04 | 35 | 560  |
| 25 | GO:0012507 | ER to Golgi transport vesicle membrane | GO: Cellular Component | 6.7E-06 | 2.0E-04 | 10 | 62   |

#### Pathway

|   |         |                                                             |                      |         |         |    |      |
|---|---------|-------------------------------------------------------------|----------------------|---------|---------|----|------|
| 1 | 1268689 | SRP-dependent cotranslational protein targeting to membrane | BioSystems: REACTOME | 2.4E-08 | 2.4E-05 | 18 | 116  |
| 2 | 1268678 | Translation                                                 | BioSystems: REACTOME | 5.8E-08 | 2.9E-05 | 21 | 165  |
| 3 | 1269203 | Innate Immune System                                        | BioSystems: REACTOME | 2.5E-07 | 8.6E-05 | 75 | 1312 |
| 4 | 1457780 | Neutrophil degranulation                                    | BioSystems: REACTOME | 9.7E-07 | 2.1E-04 | 37 | 492  |
| 5 | 1268854 | Disease                                                     | BioSystems: REACTOME | 1.3E-06 | 2.1E-04 | 54 | 867  |
| 6 | 1268691 | Peptide chain elongation                                    | BioSystems: REACTOME | 1.3E-06 | 2.1E-04 | 14 | 93   |
| 7 | 1268690 | Eukaryotic Translation Elongation                           | BioSystems: REACTOME | 2.4E-06 | 3.5E-04 | 14 | 98   |

|    |         |                                                                              |                      |         |         |    |     |
|----|---------|------------------------------------------------------------------------------|----------------------|---------|---------|----|-----|
| 8  | 1269056 | Infectious disease                                                           | BioSystems: REACTOME | 2.9E-06 | 3.7E-04 | 31 | 393 |
| 9  | 1268686 | GTP hydrolysis and joining of the 60S ribosomal subunit                      | BioSystems: REACTOME | 5.2E-06 | 4.8E-04 | 15 | 119 |
| 10 | 1268688 | L13a-mediated translational silencing of Ceruloplasmin expression            | BioSystems: REACTOME | 5.2E-06 | 4.8E-04 | 15 | 119 |
| 11 | 1269716 | Nonsense-Mediated Decay (NMD)                                                | BioSystems: REACTOME | 6.4E-06 | 4.8E-04 | 15 | 121 |
| 12 | 1269717 | Nonsense Mediated Decay (NMD) enhanced by the Exon Junction Complex (EJC)    | BioSystems: REACTOME | 6.4E-06 | 4.8E-04 | 15 | 121 |
| 13 | 1268681 | Formation of a pool of free 40S subunits                                     | BioSystems: REACTOME | 6.9E-06 | 4.8E-04 | 14 | 107 |
| 14 | 1269941 | Transport of nucleotide sugars                                               | BioSystems: REACTOME | 6.9E-06 | 4.8E-04 | 5  | 10  |
| 15 | 1269120 | Viral mRNA Translation                                                       | BioSystems: REACTOME | 7.1E-06 | 4.8E-04 | 13 | 93  |
| 16 | 1339156 | Selenocysteine synthesis                                                     | BioSystems: REACTOME | 1.0E-05 | 6.3E-04 | 13 | 96  |
| 17 | 1268692 | Eukaryotic Translation Termination                                           | BioSystems: REACTOME | 1.1E-05 | 6.3E-04 | 13 | 97  |
| 18 | 1268680 | Cap-dependent Translation Initiation                                         | BioSystems: REACTOME | 1.2E-05 | 6.3E-04 | 15 | 127 |
| 19 | 1268679 | Eukaryotic Translation Initiation                                            | BioSystems: REACTOME | 1.2E-05 | 6.3E-04 | 15 | 127 |
| 20 | 1269718 | Nonsense Mediated Decay (NMD) independent of the Exon Junction Complex (EJC) | BioSystems: REACTOME | 1.6E-05 | 8.0E-04 | 13 | 100 |
| 21 | 1269109 | Influenza Life Cycle                                                         | BioSystems: REACTOME | 1.7E-05 | 8.3E-04 | 16 | 147 |
| 22 | 1269195 | Antigen processing-Cross presentation                                        | BioSystems: REACTOME | 2.2E-05 | 1.0E-03 | 13 | 103 |
| 23 | 1269311 | Interferon Signaling                                                         | BioSystems: REACTOME | 2.3E-05 | 1.0E-03 | 19 | 202 |
| 24 | 1269115 | Influenza Viral RNA Transcription and Replication                            | BioSystems: REACTOME | 3.2E-05 | 1.3E-03 | 15 | 138 |
| 25 | 1269310 | Cytokine Signaling in Immune system                                          | BioSystems: REACTOME | 4.1E-05 | 1.6E-03 | 45 | 763 |

### 310 Downregulated genes

| GO: Molecular Function |            |                                       |                        |          |          |     |      |
|------------------------|------------|---------------------------------------|------------------------|----------|----------|-----|------|
| 1                      | GO:0003723 | RNA binding                           | GO: Molecular Function | 3.40E-26 | 2.99E-23 | 117 | 1973 |
| 2                      | GO:0042393 | histone binding                       | GO: Molecular Function | 6.28E-08 | 2.76E-05 | 19  | 203  |
| 3                      | GO:0008301 | DNA binding, bending                  | GO: Molecular Function | 1.13E-05 | 3.32E-03 | 17  | 236  |
| 4                      | GO:0070577 | lysine-acetylated histone binding     | GO: Molecular Function | 3.67E-05 | 6.45E-03 | 5   | 19   |
| 5                      | GO:0140033 | acetylation-dependent protein binding | GO: Molecular Function | 3.67E-05 | 6.45E-03 | 5   | 19   |
| 6                      | GO:0016887 | ATPase activity                       | GO: Molecular Function | 6.91E-05 | 1.01E-02 | 28  | 596  |

|    |            |                                                                                |                        |          |          |    |     |
|----|------------|--------------------------------------------------------------------------------|------------------------|----------|----------|----|-----|
| 7  | GO:0004386 | helicase activity                                                              | GO: Molecular Function | 9.93E-05 | 1.25E-02 | 13 | 177 |
| 8  | GO:0003682 | chromatin binding                                                              | GO: Molecular Function | 1.71E-04 | 1.88E-02 | 28 | 629 |
| 9  | GO:0004843 | thiol-dependent ubiquitin-specific protease activity                           | GO: Molecular Function | 4.08E-04 | 2.81E-02 | 16 | 287 |
| 10 | GO:0043022 | ribosome binding                                                               | GO: Molecular Function | 4.22E-04 | 2.81E-02 | 7  | 65  |
| 11 | GO:0101005 | ubiquitinyl hydrolase activity                                                 | GO: Molecular Function | 4.40E-04 | 2.81E-02 | 16 | 289 |
| 12 | GO:0016403 | dimethylargininase activity                                                    | GO: Molecular Function | 4.51E-04 | 2.81E-02 | 2  | 2   |
| 13 | GO:0043021 | ribonucleoprotein complex binding                                              | GO: Molecular Function | 4.76E-04 | 2.81E-02 | 11 | 156 |
| 14 | GO:0001164 | RNA polymerase I core promoter sequence-specific DNA binding                   | GO: Molecular Function | 4.79E-04 | 2.81E-02 | 3  | 8   |
| 15 | GO:0001163 | RNA polymerase I transcription regulatory region sequence-specific DNA binding | GO: Molecular Function | 4.79E-04 | 2.81E-02 | 3  | 8   |
| 16 | GO:0045296 | cadherin binding                                                               | GO: Molecular Function | 8.71E-04 | 4.79E-02 | 17 | 338 |

#### GO: Biological Process

|    |            |                                                   |                        |          |          |    |      |
|----|------------|---------------------------------------------------|------------------------|----------|----------|----|------|
| 1  | GO:0007049 | cell cycle                                        | GO: Biological Process | 1.04E-12 | 4.98E-09 | 87 | 1971 |
| 2  | GO:0016071 | mRNA metabolic process                            | GO: Biological Process | 6.78E-12 | 1.63E-08 | 52 | 901  |
| 3  | GO:0006325 | chromatin organization                            | GO: Biological Process | 6.96E-11 | 5.67E-08 | 48 | 841  |
| 4  | GO:0000278 | mitotic cell cycle                                | GO: Biological Process | 7.08E-11 | 5.67E-08 | 56 | 1083 |
| 5  | GO:0140014 | mitotic nuclear division                          | GO: Biological Process | 7.08E-11 | 5.67E-08 | 56 | 1083 |
| 6  | GO:1903047 | mitotic cell cycle process                        | GO: Biological Process | 7.08E-11 | 5.67E-08 | 56 | 1083 |
| 7  | GO:0051276 | chromosome organization                           | GO: Biological Process | 1.09E-10 | 7.50E-08 | 62 | 1287 |
| 8  | GO:0031570 | DNA integrity checkpoint                          | GO: Biological Process | 8.50E-10 | 5.03E-07 | 19 | 164  |
| 9  | GO:0022402 | cell cycle process                                | GO: Biological Process | 9.43E-10 | 5.03E-07 | 70 | 1632 |
| 10 | GO:0010564 | regulation of cell cycle process                  | GO: Biological Process | 2.05E-09 | 9.36E-07 | 45 | 839  |
| 11 | GO:0000280 | nuclear division                                  | GO: Biological Process | 2.31E-09 | 9.36E-07 | 58 | 1256 |
| 12 | GO:0044839 | cell cycle G2/M phase transition                  | GO: Biological Process | 2.43E-09 | 9.36E-07 | 24 | 279  |
| 13 | GO:0042254 | ribosome biogenesis                               | GO: Biological Process | 2.65E-09 | 9.36E-07 | 25 | 303  |
| 14 | GO:0051726 | regulation of cell cycle                          | GO: Biological Process | 2.73E-09 | 9.36E-07 | 59 | 1295 |
| 15 | GO:1901987 | regulation of cell cycle phase transition         | GO: Biological Process | 3.47E-09 | 1.11E-06 | 33 | 508  |
| 16 | GO:0022613 | ribonucleoprotein complex biogenesis              | GO: Biological Process | 4.21E-09 | 1.26E-06 | 33 | 512  |
| 17 | GO:1902749 | regulation of cell cycle G2/M phase transition    | GO: Biological Process | 4.96E-09 | 1.40E-06 | 21 | 223  |
| 18 | GO:0071824 | protein-DNA complex subunit organization          | GO: Biological Process | 7.27E-09 | 1.87E-06 | 27 | 367  |
| 19 | GO:1901990 | regulation of mitotic cell cycle phase transition | GO: Biological Process | 7.38E-09 | 1.87E-06 | 31 | 470  |

|    |            |                                       |                        |          |          |    |      |
|----|------------|---------------------------------------|------------------------|----------|----------|----|------|
| 20 | GO:0048285 | organelle fission                     | GO: Biological Process | 8.32E-09 | 1.93E-06 | 58 | 1301 |
| 21 | GO:0044770 | cell cycle phase transition           | GO: Biological Process | 8.42E-09 | 1.93E-06 | 38 | 668  |
| 22 | GO:0008380 | RNA splicing                          | GO: Biological Process | 9.93E-09 | 2.17E-06 | 31 | 476  |
| 23 | GO:0000077 | DNA damage checkpoint                 | GO: Biological Process | 1.14E-08 | 2.37E-06 | 17 | 152  |
| 24 | GO:0044772 | mitotic cell cycle phase transition   | GO: Biological Process | 1.37E-08 | 2.73E-06 | 36 | 622  |
| 25 | GO:0000086 | G2/M transition of mitotic cell cycle | GO: Biological Process | 1.53E-08 | 2.86E-06 | 22 | 260  |

**GO: Cellular Component**

|    |            |                                                 |                        |          |          |    |      |
|----|------------|-------------------------------------------------|------------------------|----------|----------|----|------|
| 1  | GO:1902494 | catalytic complex                               | GO: Cellular Component | 1.80E-14 | 1.29E-11 | 77 | 1536 |
| 2  | GO:0005730 | nucleolus                                       | GO: Cellular Component | 1.17E-09 | 4.17E-07 | 65 | 1495 |
| 3  | GO:0022624 | proteasome accessory complex                    | GO: Cellular Component | 1.69E-08 | 4.04E-06 | 8  | 25   |
| 4  | GO:0005838 | proteasome regulatory particle                  | GO: Cellular Component | 1.43E-07 | 2.56E-05 | 7  | 22   |
| 5  | GO:0016604 | nuclear body                                    | GO: Cellular Component | 5.26E-07 | 7.53E-05 | 38 | 799  |
| 6  | GO:0008540 | proteasome regulatory particle, base subcomplex | GO: Cellular Component | 2.03E-06 | 2.43E-04 | 5  | 12   |
| 7  | GO:0005681 | spliceosomal complex                            | GO: Cellular Component | 4.40E-06 | 4.50E-04 | 15 | 186  |
| 8  | GO:0005814 | centriole                                       | GO: Cellular Component | 5.23E-06 | 4.68E-04 | 29 | 583  |
| 9  | GO:0000502 | proteasome complex                              | GO: Cellular Component | 6.31E-06 | 5.02E-04 | 9  | 67   |
| 10 | GO:1905369 | endopeptidase complex                           | GO: Cellular Component | 7.15E-06 | 5.12E-04 | 9  | 68   |
| 11 | GO:0005815 | microtubule organizing center                   | GO: Cellular Component | 1.80E-05 | 1.17E-03 | 33 | 756  |
| 12 | GO:0016607 | nuclear speck                                   | GO: Cellular Component | 2.01E-05 | 1.20E-03 | 22 | 406  |
| 13 | GO:0005813 | centrosome                                      | GO: Cellular Component | 2.19E-05 | 1.21E-03 | 26 | 532  |
| 14 | GO:0000922 | spindle pole                                    | GO: Cellular Component | 2.95E-05 | 1.51E-03 | 13 | 168  |
| 15 | GO:0005819 | spindle                                         | GO: Cellular Component | 3.24E-05 | 1.55E-03 | 20 | 359  |
| 16 | GO:0015630 | microtubule cytoskeleton                        | GO: Cellular Component | 3.57E-05 | 1.60E-03 | 49 | 1368 |
| 17 | GO:0000775 | chromosome, centromeric region                  | GO: Cellular Component | 4.98E-05 | 2.10E-03 | 14 | 202  |
| 18 | GO:0000793 | condensed chromosome                            | GO: Cellular Component | 7.29E-05 | 2.90E-03 | 15 | 236  |
| 19 | GO:1905368 | peptidase complex                               | GO: Cellular Component | 9.05E-05 | 3.41E-03 | 9  | 93   |
| 20 | GO:1990234 | transferase complex                             | GO: Cellular Component | 2.00E-04 | 7.15E-03 | 32 | 821  |
| 21 | GO:0098687 | chromosomal region                              | GO: Cellular Component | 3.25E-04 | 1.11E-02 | 18 | 362  |
| 22 | GO:0005682 | U5 snRNP                                        | GO: Cellular Component | 3.88E-04 | 1.23E-02 | 10 | 137  |
| 23 | GO:1990565 | HSP90-CDC37 chaperone complex                   | GO: Cellular Component | 3.94E-04 | 1.23E-02 | 2  | 2    |
| 24 | GO:0016514 | SWI/SNF complex                                 | GO: Cellular Component | 4.53E-04 | 1.35E-02 | 4  | 19   |
| 25 | GO:0000974 | Prp19 complex                                   | GO: Cellular Component | 5.34E-04 | 1.53E-02 | 8  | 94   |

| Pathway |         |                                                                                                          |                      |          |          |    |      |  |
|---------|---------|----------------------------------------------------------------------------------------------------------|----------------------|----------|----------|----|------|--|
| 1       | 1269741 | Cell Cycle                                                                                               | BioSystems: REACTOME | 1.44E-10 | 1.21E-07 | 41 | 624  |  |
| 2       | 1269799 | G2/M Transition                                                                                          | BioSystems: REACTOME | 4.47E-10 | 1.53E-07 | 21 | 184  |  |
| 3       | 1269797 | Mitotic G2-G2/M phases                                                                                   | BioSystems: REACTOME | 5.47E-10 | 1.53E-07 | 21 | 186  |  |
| 4       | 1269649 | Gene Expression                                                                                          | BioSystems: REACTOME | 2.99E-09 | 6.26E-07 | 77 | 1844 |  |
| 5       | 1269763 | Cell Cycle, Mitotic                                                                                      | BioSystems: REACTOME | 2.21E-08 | 3.69E-06 | 33 | 517  |  |
| 6       | 1383017 | The role of GTSE1 in G2/M progression after G2 checkpoint                                                | BioSystems: REACTOME | 8.66E-07 | 1.21E-04 | 10 | 63   |  |
| 7       | 1269742 | Cell Cycle Checkpoints                                                                                   | BioSystems: REACTOME | 2.03E-06 | 2.34E-04 | 17 | 204  |  |
| 8       | 1269837 | Regulation of mitotic cell cycle                                                                         | BioSystems: REACTOME | 3.18E-06 | 2.34E-04 | 11 | 89   |  |
| 9       | 1269838 | APC/C-mediated degradation of cell cycle proteins                                                        | BioSystems: REACTOME | 3.18E-06 | 2.34E-04 | 11 | 89   |  |
| 10      | 1457807 | FBXL7 down-regulates AURKA during mitotic entry and in early mitosis                                     | BioSystems: REACTOME | 3.75E-06 | 2.34E-04 | 9  | 58   |  |
| 11      | 1269781 | Switching of origins to a post-replicative state                                                         | BioSystems: REACTOME | 3.95E-06 | 2.34E-04 | 10 | 74   |  |
| 12      | 1269782 | Orc1 removal from chromatin                                                                              | BioSystems: REACTOME | 3.95E-06 | 2.34E-04 | 10 | 74   |  |
| 13      | 1269851 | APC/C:Cdh1 mediated degradation of Cdc20 and other APC/C:Cdh1 targeted proteins in late mitosis/early G1 | BioSystems: REACTOME | 4.47E-06 | 2.34E-04 | 10 | 75   |  |
| 14      | 1269846 | Cdc20:Phospho-APC/C mediated degradation of Cyclin A                                                     | BioSystems: REACTOME | 4.47E-06 | 2.34E-04 | 10 | 75   |  |
| 15      | 1269753 | G2/M Checkpoints                                                                                         | BioSystems: REACTOME | 4.68E-06 | 2.34E-04 | 15 | 172  |  |
| 16      | 1268928 | Hh mutants that don't undergo autocatalytic processing are degraded by ERAD                              | BioSystems: REACTOME | 5.02E-06 | 2.34E-04 | 9  | 60   |  |
| 17      | 1269796 | Removal of licensing factors from origins                                                                | BioSystems: REACTOME | 5.05E-06 | 2.34E-04 | 10 | 76   |  |
| 18      | 1269845 | APC:Cdc20 mediated degradation of cell cycle proteins prior to satisfaction of the cell cycle checkpoint | BioSystems: REACTOME | 5.05E-06 | 2.34E-04 | 10 | 76   |  |
| 19      | 1269689 | mRNA Splicing                                                                                            | BioSystems: REACTOME | 5.31E-06 | 2.34E-04 | 16 | 196  |  |
| 20      | 1269844 | APC/C:Cdc20 mediated degradation of mitotic proteins                                                     | BioSystems: REACTOME | 6.41E-06 | 2.51E-04 | 10 | 78   |  |
| 21      | 1268927 | Hh mutants abrogate ligand secretion                                                                     | BioSystems: REACTOME | 6.63E-06 | 2.51E-04 | 9  | 62   |  |
| 22      | 1269836 | CDT1 association with the CDC6:ORC:origin complex                                                        | BioSystems: REACTOME | 6.63E-06 | 2.51E-04 | 9  | 62   |  |
| 23      | 1269794 | Regulation of DNA replication                                                                            | BioSystems: REACTOME | 7.20E-06 | 2.51E-04 | 10 | 79   |  |
| 24      | 1269842 | Activation of APC/C and APC/C:Cdc20 mediated degradation of mitotic proteins                             | BioSystems: REACTOME | 7.20E-06 | 2.51E-04 | 10 | 79   |  |
| 25      | 1269770 | SCF(Skp2)-mediated degradation of p27/p21                                                                | BioSystems: REACTOME | 7.59E-06 | 2.54E-04 | 9  | 63   |  |

B&H, Benjamini and Hochberg; EoC, eosinophilic colitis; FDR, false discovery rate; GO, gene ontology.

**Supplementary Table 9.** Biological processes enriched in histo-molecular correlation for EoC

| ID                                                    | Name                                                                      | P value | FDR B&H | Genes from Input | Genes in Annotation |
|-------------------------------------------------------|---------------------------------------------------------------------------|---------|---------|------------------|---------------------|
| <b>Overall eosinophilic inflammation</b>              |                                                                           |         |         |                  |                     |
| 1                                                     | GO:0009206 purine ribonucleoside triphosphate biosynthetic process        | 2.8E-07 | 5.3E-04 | 13               | 204                 |
| 2                                                     | GO:0009145 purine nucleoside triphosphate biosynthetic process            | 3.0E-07 | 5.3E-04 | 13               | 205                 |
| 3                                                     | GO:0009201 ribonucleoside triphosphate biosynthetic process               | 4.0E-07 | 5.3E-04 | 13               | 210                 |
| 4                                                     | GO:0009205 purine ribonucleoside triphosphate metabolic process           | 6.1E-07 | 5.3E-04 | 13               | 218                 |
| 5                                                     | GO:0009142 nucleoside triphosphate biosynthetic process                   | 6.7E-07 | 5.3E-04 | 13               | 220                 |
| 6                                                     | GO:0009199 ribonucleoside triphosphate metabolic process                  | 8.7E-07 | 5.3E-04 | 13               | 225                 |
| 7                                                     | GO:0009144 purine nucleoside triphosphate metabolic process               | 9.6E-07 | 5.3E-04 | 13               | 227                 |
| 8                                                     | GO:0006754 ATP biosynthetic process                                       | 1.0E-06 | 5.3E-04 | 12               | 192                 |
| 9                                                     | GO:0009152 purine ribonucleotide biosynthetic process                     | 1.4E-06 | 5.7E-04 | 15               | 314                 |
| 10                                                    | GO:0042775 mitochondrial ATP synthesis coupled electron transport         | 1.4E-06 | 5.7E-04 | 9                | 102                 |
| <b>Pericryptal circumferential eosinophil collars</b> |                                                                           |         |         |                  |                     |
| 1                                                     | GO:0007005 mitochondrion organization                                     | 3.2E-07 | 9.7E-04 | 15               | 599                 |
| <b>Lamina propria eosinophil sheets</b>               |                                                                           |         |         |                  |                     |
| 1                                                     | GO:0045047 protein targeting to ER                                        | 8.6E-06 | 3.0E-03 | 5                | 123                 |
| 2                                                     | GO:0043604 amide biosynthetic process                                     | 6.4E-06 | 3.0E-03 | 11               | 943                 |
| 3                                                     | GO:0006518 peptide metabolic process                                      | 8.8E-06 | 3.0E-03 | 11               | 975                 |
| 4                                                     | GO:0043043 peptide biosynthetic process                                   | 9.9E-06 | 3.0E-03 | 10               | 799                 |
| 5                                                     | GO:0072599 establishment of protein localization to endoplasmic reticulum | 1.0E-05 | 3.0E-03 | 5                | 127                 |
| 6                                                     | GO:0043603 cellular amide metabolic process                               | 2.0E-05 | 4.9E-03 | 12               | 1276                |
| 7                                                     | GO:0070972 protein localization to endoplasmic reticulum                  | 2.6E-05 | 5.6E-03 | 5                | 155                 |
| 8                                                     | GO:0006414 translational elongation                                       | 5.0E-05 | 8.2E-03 | 9                | 770                 |
| 9                                                     | GO:0006412 translation                                                    | 5.0E-05 | 8.2E-03 | 9                | 770                 |
| 10                                                    | GO:0006413 translational initiation                                       | 8.7E-05 | 1.3E-02 | 5                | 199                 |

B&H, Benjamini and Hochberg; EoC, eosinophilic colitis; FDR, false discovery rate; GO, gene ontology.

**Supplementary Table 10.** Gene list for EoC-IBD differential score

| <b>Gene symbol</b> | <b>P value<br/>Active EoC vs<br/>UC (High eos)</b> | <b>Fold<br/>Change</b> | <b>Regulation</b> | <b>P value<br/>Active EoC vs<br/>CD (High eos)</b> | <b>Fold<br/>Change</b> | <b>Regulation</b> |
|--------------------|----------------------------------------------------|------------------------|-------------------|----------------------------------------------------|------------------------|-------------------|
| <i>CAPN12</i>      | 1.0E-20                                            | 46.6                   | up                | 8.6E-04                                            | 1.9                    | up                |
| <i>CD9</i>         | 9.8E-11                                            | 2.1                    | up                | 2.0E-07                                            | 5.0                    | up                |
| <i>COMMD6</i>      | 3.2E-07                                            | 2.9                    | up                | 1.8E-04                                            | 5.5                    | up                |
| <i>F13A1</i>       | 2.1E-04                                            | 2.4                    | up                | 1.5E-04                                            | 5.5                    | up                |
| <i>IFITM1</i>      | 4.5E-02                                            | 1.4                    | up                | 1.9E-03                                            | 5.3                    | up                |
| <i>MGST3</i>       | 8.6E-05                                            | 1.6                    | up                | 8.1E-06                                            | 5.1                    | up                |
| <i>MT1H</i>        | 2.3E-14                                            | 59.3                   | up                | 2.7E-04                                            | 15.8                   | up                |
| <i>MTIX</i>        | 3.6E-03                                            | 2.1                    | up                | 1.4E-04                                            | 10.9                   | up                |
| <i>PHLPP2</i>      | 3.6E-12                                            | 3.9                    | up                | 2.9E-06                                            | 6.9                    | up                |
| <i>SLC51B</i>      | 7.5E-06                                            | 2.3                    | up                | 1.1E-04                                            | 7.2                    | up                |
| <i>TMEM171</i>     | 1.2E-12                                            | 4.4                    | up                | 1.0E-04                                            | 8.3                    | up                |
| <i>TMEM251</i>     | 4.4E-04                                            | 1.5                    | up                | 1.2E-05                                            | 5.2                    | up                |
| <i>ZFAND3</i>      | 2.7E-05                                            | 1.9                    | up                | 9.8E-06                                            | 5.0                    | up                |
| <i>EEF1D</i>       | 3.9E-21                                            | -10.6                  | down              | 1.6E-04                                            | -2.6                   | down              |
| <i>HYOU1</i>       | 2.0E-28                                            | -20.5                  | down              | 3.0E-04                                            | -2.5                   | down              |
| <i>STT3A</i>       | 2.8E-27                                            | -12.6                  | down              | 4.3E-04                                            | -2.4                   | down              |
| <i>VNN2</i>        | 5.8E-07                                            | -3.5                   | down              | 7.2E-05                                            | -5.3                   | down              |

EoC, eosinophilic colitis; IBD, inflammatory bowel disease; UC, ulcerative colitis; CD, Crohn disease.

**List of participants in CEGIR**

| <b>Given Name</b> | <b>Surname</b> |
|-------------------|----------------|
| J. Pablo          | Abonia         |
| Seema             | Aceves         |
| Samuel            | Almonte        |
| Rachel            | Andrews        |
| Sara              | Anvari         |
| Ashley            | Arrington      |
| Nicoleta          | Arva           |
| Fred              | Atkins         |
| Dominique         | Bailey         |
| Alexis            | Berry          |
| Bridget           | Besl           |
| Scott             | Bolton         |
| Peter             | Bonis          |
| Wendy             | Book           |
| Kimberly          | Bray           |
| Teresa            | Brown          |
| Cassandra         | Burger         |
| Deirdre           | Burke          |
| Jonathon          | Cahoon         |
| Kelley            | Capocelli      |
| Mirna             | Chehade        |
| Eric              | Chiou          |
| Margaret          | Collins        |
| Carla             | Davis          |
| Evan              | Dellon         |
| Maureen           | DeMarshall     |
| Lauren            | DiTommaso      |
| Ranjan            | Dohil          |
| Michael           | Eby            |
| Gary              | Falk           |
| David             | Fleischer      |
| Heather           | Foote          |
| Kelci             | Foss           |
| Joel              | Friedlander    |
| Patricia          | Fulkerson      |
| Glenn             | Furuta         |
| Debra             | Geno           |
| Nirmala           | Gonsalves      |
| Thomas            | Greuter        |
| Sandeep           | Gupta          |
| Frank             | Hamilton       |
| Kirk              | Harris         |
| Jennifer          | Harris         |



|                      |                |
|----------------------|----------------|
| Ikuo                 | Hirano         |
| Girish               | Hiremath       |
| Nicole               | Holland-Thomas |
| Lea                  | Jacinto        |
| Amir                 | Kagalwalla     |
| Timothy              | Kaseta         |
| David                | Katzka         |
| Kaitlin              | Keeley         |
| Emad                 | Khosh-Hemmat   |
| Paneez               | Khoury         |
| Eileen               | King           |
| Kara                 | Kliewer        |
| Amy                  | Klion          |
| Jennifer             | Knowles        |
| Kendra               | Kocher         |
| Ellyn                | Kodroff        |
| Jeffrey              | Krischer       |
| Shay                 | Kyle           |
| John                 | Leung          |
| Meredith             | Levy           |
| Chris                | Liacouras      |
| Denise               | Mack           |
| Lisa                 | Martin         |
| Ellen                | Martin         |
| Talaya               | McCright-Gill  |
| Paul                 | Menard-Katcher |
| Calies               | Menard-Katcher |
| Gabriela             | Mendoza        |
| Melissa              | Mingler        |
| Mike                 | Minnicozzi     |
| Amanda               | Muir           |
| Vincent              | Mukkada        |
| Cristin              | Murray-Petzold |
| Robert               | Newbury        |
| Quan                 | Nhu            |
| Anthony              | Olive          |
| Oghenekpaobor (Joel) | Oyibo          |
| Allisa               | Paliana        |
| Zhaoxing             | Pan            |
| Robbie               | Pesek          |
| Kathryn              | Peterson       |
| Heidi                | Poppendeck     |
| Philip               | Putnam         |
| Fabian               | Rivera         |
| Marc                 | Rothenberg     |

|           |                |
|-----------|----------------|
| Amanda    | Rudman Spergel |
| Kathleen  | Sable          |
| Alain     | Schoepfer      |
| Melissa   | Scott          |
| Rachel    | Sheridan       |
| Selma     | Sinanovic      |
| Jonathan  | Spergel        |
| Mary Jo   | Strobel        |
| Kiki      | Sun            |
| Amy       | Tasco          |
| Crystal   | Tholen         |
| Katherine | Thompson       |
| Tiffany   | Tomkinson      |
| Daisy     | Tran           |
| Alexandra | Tylicki        |
| Tiina     | Urv            |
| Mei-Lun   | Wang           |
| Joshua    | Wechsler       |
| Barry     | Wershil        |
| Lisa      | Wheatley       |
| Leah      | Wilkey         |
| Guang-Yu  | Yang           |
| Angelika  | Zalewski       |
| Amy       | Zicarelli      |

---
